# Supplementary material for: MTSv: rapid alignment-based taxonomic classification and high-confidence metagenomic analysis
Source: PeerJ. 2022 Nov 8;10:e14292. doi: 10.7717/peerj.14292 (PMC9651046; doi:10.7717/peerj.14292)
Supplement: Supplemental Information 1 — The first index included sequences from the Bacillus genus: 116 genomes from B. anthracis (287 sequences), and one genome each from B. cereus, B. subtilis, B. thuringiensis. The second index contained 961 sequences from Staphylococcus aureus (1, 863 sequences) and one genome from S. epidermidis. The highlighted genomes were used to simulate the reads. [file peerj-10-14292-s001.xlsx]

## Sheet: Toy Index Ref Seqs
Supplementary Table 1. List of sequences included in the toy indices when comparing MTSv and traditional read aligners. The first index included sequences from the Bacillus genus: 116 genomes from B. anthracis (287 sequences), and one genome each from B. cereus, B. subtilis, B. thuringiensis. The second index contained 961 sequences from Staphylococcus aureus (1, 863 sequences) and one genome fro…
Species	Assembly	Accession	Description
Staphylococcus epidermidis	GCA_002085695.1_ASM208569v1	NZ_CP020463.1	Staphylococcus epidermidis strain 1457 chromosome, complete genome
Staphylococcus aureus	GCF_000009005.1_ASM900v1	NC_007622.1	Staphylococcus aureus RF122, complete sequence
Staphylococcus aureus	GCF_000009585.1_ASM958v1	NC_017333.1	Staphylococcus aureus subsp. aureus ST398, complete sequence
Staphylococcus aureus	GCF_000009585.1_ASM958v1	NC_017334.1	Staphylococcus aureus subsp. aureus ST398 plasmid pS0385-1, complete sequence
Staphylococcus aureus	GCF_000009585.1_ASM958v1	NC_017335.1	Staphylococcus aureus subsp. aureus ST398 plasmid pS0385-2, complete sequence
Staphylococcus aureus	GCF_000009585.1_ASM958v1	NC_017336.1	Staphylococcus aureus subsp. aureus ST398 plasmid pS0385-3, complete sequence
Staphylococcus aureus	GCF_000009645.1_ASM964v1	NC_002745.2	Staphylococcus aureus subsp. aureus N315, complete sequence
Staphylococcus aureus	GCF_000009645.1_ASM964v1	NC_003140.1	Staphylococcus aureus subsp. aureus N315 plasmid pN315, complete sequence
Staphylococcus aureus	GCF_000009665.1_ASM966v1	NC_002758.2	Staphylococcus aureus subsp. aureus Mu50, complete sequence
Staphylococcus aureus	GCF_000009665.1_ASM966v1	NC_002774.1	Staphylococcus aureus subsp. aureus Mu50 plasmid VRSAp, complete sequence
Staphylococcus aureus	GCF_000010445.1_ASM1044v1	NC_009782.1	Staphylococcus aureus subsp. aureus Mu3, complete sequence
Staphylococcus aureus	GCF_000010465.1_ASM1046v1	NC_009641.1	Staphylococcus aureus subsp. aureus str. Newman, complete sequence
Staphylococcus aureus	GCF_000011265.1_ASM1126v1	NC_003923.1	Staphylococcus aureus subsp. aureus MW2, complete sequence
Staphylococcus aureus	GCF_000011505.1_ASM1150v1	NC_002952.2	Staphylococcus aureus subsp. aureus MRSA252, complete sequence
Staphylococcus aureus	GCF_000011525.1_ASM1152v1	NC_002953.3	Staphylococcus aureus subsp. aureus MSSA476, complete sequence
Staphylococcus aureus	GCF_000011525.1_ASM1152v1	NC_005951.1	Staphylococcus aureus subsp. aureus MSSA476 plasmid pSAS, complete sequence
Staphylococcus aureus	GCF_000012045.1_ASM1204v1	NC_002951.2	Staphylococcus aureus subsp. aureus COL, complete sequence
Staphylococcus aureus	GCF_000012045.1_ASM1204v1	NC_006629.2	Staphylococcus aureus subsp. aureus COL plasmid pT181, complete sequence
Staphylococcus aureus	GCF_000013425.1_ASM1342v1	NC_007795.1	Staphylococcus aureus subsp. aureus NCTC 8325 chromosome, complete genome
Staphylococcus aureus	GCF_000013465.1_ASM1346v1	NC_007793.1	Staphylococcus aureus subsp. aureus USA300_FPR3757, complete sequence
Staphylococcus aureus	GCF_000013465.1_ASM1346v1	NC_007790.1	Staphylococcus aureus subsp. aureus USA300_FPR3757 plasmid pUSA01, complete sequence
Staphylococcus aureus	GCF_000013465.1_ASM1346v1	NC_007791.1	Staphylococcus aureus subsp. aureus USA300_FPR3757 plasmid pUSA02, complete sequence
Staphylococcus aureus	GCF_000013465.1_ASM1346v1	NC_007792.1	Staphylococcus aureus subsp. aureus USA300_FPR3757 plasmid pUSA03, complete sequence
Staphylococcus aureus	GCF_000016805.1_ASM1680v1	NC_009487.1	Staphylococcus aureus subsp. aureus JH9, complete sequence
Staphylococcus aureus	GCF_000016805.1_ASM1680v1	NC_009477.1	Staphylococcus aureus subsp. aureus JH9 plasmid pSJH901, complete sequence
Staphylococcus aureus	GCF_000017085.1_ASM1708v1	NC_010079.1	Staphylococcus aureus subsp. aureus USA300_TCH1516, complete sequence
Staphylococcus aureus	GCF_000017085.1_ASM1708v1	NC_012417.1	Staphylococcus aureus subsp. aureus USA300_TCH1516 plasmid pUSA01-HOU, complete sequence
Staphylococcus aureus	GCF_000017085.1_ASM1708v1	NC_010063.1	Staphylococcus aureus subsp. aureus USA300_TCH1516 plasmid pUSA300HOUMR, complete sequence
Staphylococcus aureus	GCF_000024585.1_ASM2458v1	NC_013450.1	Staphylococcus aureus subsp. aureus ED98, complete sequence
Staphylococcus aureus	GCF_000024585.1_ASM2458v1	NC_013453.1	Staphylococcus aureus subsp. aureus ED98 plasmid pAVX, complete sequence
Staphylococcus aureus	GCF_000024585.1_ASM2458v1	NC_013451.1	Staphylococcus aureus subsp. aureus ED98 plasmid pAVY, complete sequence
Staphylococcus aureus	GCF_000024585.1_ASM2458v1	NC_013452.1	Staphylococcus aureus subsp. aureus ED98 plasmid pT181, complete sequence
Staphylococcus aureus	GCF_000025145.1_ASM2514v1	NC_017340.1	Staphylococcus aureus 04-02981, complete sequence
Staphylococcus aureus	GCF_000027045.1_ASM2704v1	NC_017331.1	Staphylococcus aureus subsp. aureus TW20, complete sequence
Staphylococcus aureus	GCF_000027045.1_ASM2704v1	NC_017352.1	Staphylococcus aureus subsp. aureus TW20 plasmid pTW20_1, complete sequence
Staphylococcus aureus	GCF_000027045.1_ASM2704v1	NC_017332.1	Staphylococcus aureus subsp. aureus TW20 plasmid pTW20_2, complete sequence
Staphylococcus aureus	GCF_000144955.1_ASM14495v1	NC_017338.1	Staphylococcus aureus subsp. aureus JKD6159, complete sequence
Staphylococcus aureus	GCF_000144955.1_ASM14495v1	NC_017339.1	Staphylococcus aureus subsp. aureus JKD6159 plasmid pSaa6159, complete sequence
Staphylococcus aureus	GCF_000145595.1_ASM14559v1	NC_017341.1	Staphylococcus aureus subsp. aureus str. JKD6008, complete sequence
Staphylococcus aureus	GCF_000159535.2_ASM15953v2	NC_017342.1	Staphylococcus aureus subsp. aureus TCH60, complete sequence
Staphylococcus aureus	GCF_000159535.2_ASM15953v2	NC_017345.1	Staphylococcus aureus subsp. aureus TCH60 plasmid unnamed, complete sequence
Staphylococcus aureus	GCF_000160195.1_ASM16019v1	NZ_CM000952.1	Staphylococcus aureus subsp. aureus MN8 chromosome, whole genome shotgun sequence
Staphylococcus aureus	GCF_000160335.2_ASM16033v2	NC_022113.1	Staphylococcus aureus subsp. aureus 55/2053, complete sequence
Staphylococcus aureus	GCF_000160335.2_ASM16033v2	NC_022126.1	Staphylococcus aureus subsp. aureus 55/2053 plasmid unnamed, complete sequence
Staphylococcus aureus	GCF_000189455.2_ASM18945v3	NZ_CP025395.1	Staphylococcus aureus O46 chromosome, complete genome
Staphylococcus aureus	GCF_000204665.1_ASM20466v1	NC_017347.1	Staphylococcus aureus subsp. aureus T0131, complete sequence
Staphylococcus aureus	GCF_000210315.1_ASM21031v1	NC_017337.1	Staphylococcus aureus subsp. aureus ED133, complete sequence
Staphylococcus aureus	GCF_000237125.2_ASM23712v3	NC_016928.2	Staphylococcus aureus subsp. aureus M013, complete sequence
Staphylococcus aureus	GCF_000237125.2_ASM23712v3	NZ_CP039996.1	Staphylococcus aureus subsp. aureus M013 plasmid pM013, complete sequence
Staphylococcus aureus	GCF_000237265.1_ASM23726v1	NC_017349.1	Staphylococcus aureus subsp. aureus LGA251, complete sequence
Staphylococcus aureus	GCF_000237265.1_ASM23726v1	NC_017348.1	Staphylococcus aureus subsp. aureus LGA251 plasmid pLGA251, complete sequence
Staphylococcus aureus	GCF_000239235.1_ASM23923v1	NC_017351.1	Staphylococcus aureus subsp. aureus 11819-97, complete sequence
Staphylococcus aureus	GCF_000239235.1_ASM23923v1	NC_017350.1	Staphylococcus aureus subsp. aureus 11819-97 plasmid p11819-97, complete sequence
Staphylococcus aureus	GCF_000245495.1_ASM24549v1	NC_016912.1	Staphylococcus aureus subsp. aureus VC40, complete sequence
Staphylococcus aureus	GCF_000253135.1_ASM25313v1	NC_017343.1	Staphylococcus aureus subsp. aureus ECT-R 2, complete sequence
Staphylococcus aureus	GCF_000253135.1_ASM25313v1	NC_017346.1	Staphylococcus aureus subsp. aureus ECT-R 2 plasmid pLUH01, complete sequence
Staphylococcus aureus	GCF_000253135.1_ASM25313v1	NC_017344.1	Staphylococcus aureus subsp. aureus ECT-R 2 plasmid pLUH02, complete sequence
Staphylococcus aureus	GCF_000258685.1_ASM25868v1	NC_017673.1	Staphylococcus aureus subsp. aureus 71193, complete sequence
Staphylococcus aureus	GCF_000284535.1_ASM28453v1	NC_017763.1	Staphylococcus aureus subsp. aureus HO 5096 0412, complete sequence
Staphylococcus aureus	GCF_000296595.1_ASM29659v1	NC_018608.1	Staphylococcus aureus 08BA02176, complete sequence
Staphylococcus aureus	GCF_000367745.1_ASM36774v1	NC_021059.1	Staphylococcus aureus M1, complete sequence
Staphylococcus aureus	GCF_000367745.1_ASM36774v1	NC_021060.1	Staphylococcus aureus M1 plasmid pSK67-M1, complete sequence
Staphylococcus aureus	GCF_000382965.1_ASM38296v1	NC_020533.1	Staphylococcus aureus subsp. aureus ST228, complete sequence
Staphylococcus aureus	GCF_000382965.1_ASM38296v1	NC_020534.1	Staphylococcus aureus subsp. aureus ST228 plasmid pI4T8, complete sequence
Staphylococcus aureus	GCF_000382985.1_ASM38298v1	NC_020566.1	Staphylococcus aureus subsp. aureus ST228, complete sequence
Staphylococcus aureus	GCF_000382985.1_ASM38298v1	NC_020535.1	Staphylococcus aureus subsp. aureus ST228 plasmid pI5S5, complete sequence
Staphylococcus aureus	GCF_000383005.1_ASM38300v1	NC_020568.1	Staphylococcus aureus subsp. aureus ST228, complete sequence
Staphylococcus aureus	GCF_000383005.1_ASM38300v1	NC_020539.1	Staphylococcus aureus subsp. aureus ST228 plasmid pI8T7, complete sequence
Staphylococcus aureus	GCF_000412775.1_ASM41277v1	NC_021554.1	Staphylococcus aureus CA-347, complete sequence
Staphylococcus aureus	GCF_000412775.1_ASM41277v1	NC_021552.1	Staphylococcus aureus CA-347 plasmid unnamed, complete sequence
Staphylococcus aureus	GCF_000418345.1_ASM41834v1	NC_021670.1	Staphylococcus aureus, complete sequence
Staphylococcus aureus	GCF_000418345.1_ASM41834v1	NC_021657.1	Staphylococcus aureus plasmid pBmb9393, complete sequence
Staphylococcus aureus	GCF_000452385.2_ASM45238v2	NZ_CP012409.1	Staphylococcus aureus subsp. aureus Tager 104 chromosome, complete genome
Staphylococcus aureus	GCF_000462955.1_ASM46295v1	NC_022222.1	Staphylococcus aureus subsp. aureus 6850, complete sequence
Staphylococcus aureus	GCF_000463055.1_ASM46305v1	NC_022226.1	Staphylococcus aureus subsp. aureus CN1, complete sequence
Staphylococcus aureus	GCF_000463055.1_ASM46305v1	NC_022227.1	Staphylococcus aureus subsp. aureus CN1 plasmid unnamed, complete sequence
Staphylococcus aureus	GCF_000463055.1_ASM46305v1	NC_022228.1	Staphylococcus aureus subsp. aureus CN1 plasmid unnamed2, complete sequence
Staphylococcus aureus	GCF_000470845.1_ASM47084v1	NC_022442.1	Staphylococcus aureus subsp. aureus SA957, complete sequence
Staphylococcus aureus	GCF_000470865.1_ASM47086v1	NC_022443.1	Staphylococcus aureus subsp. aureus SA40, complete sequence
Staphylococcus aureus	GCF_000485885.1_ASM48588v1	NC_022604.1	Staphylococcus aureus subsp. aureus Z172, complete sequence
Staphylococcus aureus	GCF_000485885.1_ASM48588v1	NC_022610.1	Staphylococcus aureus subsp. aureus Z172 plasmid pZ172_1, complete sequence
Staphylococcus aureus	GCF_000485885.1_ASM48588v1	NC_022605.1	Staphylococcus aureus subsp. aureus Z172 plasmid pZ172_2, complete sequence
Staphylococcus aureus	GCF_000568455.1_ASM56845v1	NZ_CP007176.1	Staphylococcus aureus USA300-ISMMS1 chromosome, complete genome
Staphylococcus aureus	GCF_000568455.1_ASM56845v1	NZ_CP007177.1	Staphylococcus aureus USA300-ISMMS1 plasmid pUSA01-ISMMS, complete sequence
Staphylococcus aureus	GCF_000568455.1_ASM56845v1	NZ_CP007178.1	Staphylococcus aureus USA300-ISMMS1 plasmid pUSA02-ISMMS, complete sequence
Staphylococcus aureus	GCF_000597965.1_ASM59796v1	NZ_CP007454.1	Staphylococcus aureus strain 502A isolate RN6607 chromosome, complete genome
Staphylococcus aureus	GCF_000597965.1_ASM59796v1	NZ_CP007455.1	Staphylococcus aureus strain 502A isolate RN6607 plasmid unnamed, complete sequence
Staphylococcus aureus	GCF_000626615.2_ASM62661v3	NZ_CP007539.2	Staphylococcus aureus strain FDAARGOS_5 chromosome, complete genome
Staphylococcus aureus	GCF_000695215.1_ASM69521v1	NZ_CP007659.1	Staphylococcus aureus strain H-EMRSA-15 chromosome, complete genome
Staphylococcus aureus	GCF_000695875.1_ASM69587v1	NZ_CP007690.1	Staphylococcus aureus strain UA-S391_USA300 isolate abscess/wound isolate chromosome, complete genome
Staphylococcus aureus	GCF_000737615.1_ASM73761v1	NZ_CP006630.1	Staphylococcus aureus subsp. aureus SA268 chromosome, complete genome
Staphylococcus aureus	GCF_000746505.1_ASM74650v1	NZ_CP007499.1	Staphylococcus aureus strain 2395 USA500 chromosome, complete genome
Staphylococcus aureus	GCF_000746505.1_ASM74650v1	NZ_CP007500.1	Staphylococcus aureus strain 2395 USA500 plasmid pUSA500, complete sequence
Staphylococcus aureus	GCF_000756205.1_ASM75620v1	NZ_CP009361.1	Staphylococcus aureus strain ATCC 25923 chromosome, complete genome
Staphylococcus aureus	GCF_000756205.1_ASM75620v1	NZ_CP009362.1	Staphylococcus aureus strain ATCC 25923 plasmid pS1945, complete sequence
Staphylococcus aureus	GCF_000769575.1_ASM76957v1	NZ_CP009681.1	Staphylococcus aureus strain Gv69 chromosome, complete genome
Staphylococcus aureus	GCF_000772025.1_ASM77202v1	NZ_CP009554.1	Staphylococcus aureus strain FORC_001 chromosome, complete genome
Staphylococcus aureus	GCF_000815045.1_ASM81504v1	NZ_CP010295.1	Staphylococcus aureus strain ATCC BAA1680 chromosome, complete genome
Staphylococcus aureus	GCF_000815085.1_ASM81508v1	NZ_CP010296.1	Staphylococcus aureus strain ATCC BAA1680 chromosome, complete genome
Staphylococcus aureus	GCF_000815125.1_ASM81512v1	NZ_CP010297.1	Staphylococcus aureus strain ATCC BAA1680 chromosome, complete genome
Staphylococcus aureus	GCF_000815165.1_ASM81516v1	NZ_CP010298.1	Staphylococcus aureus strain ATCC BAA1680 chromosome, complete genome
Staphylococcus aureus	GCF_000815205.1_ASM81520v1	NZ_CP010299.1	Staphylococcus aureus strain ATCC BAA1680 chromosome, complete genome
Staphylococcus aureus	GCF_000815245.1_ASM81524v1	NZ_CP010300.1	Staphylococcus aureus strain ATCC BAA1680 chromosome, complete genome
Staphylococcus aureus	GCF_000828035.1_ASM82803v1	NZ_CP010526.1	Staphylococcus aureus subsp. aureus ST772-MRSA-V strain DAR4145 chromosome, complete genome
Staphylococcus aureus	GCF_000953255.1_Staphylococcus_aureus_Sa_ILRI_217	NZ_LN626917.1	Staphylococcus aureus strain ILRI_Eymole1/1 isolate Staphylococcus aureus isolate ILRI_Eymole1/1 chromosome I, complete sequence
Staphylococcus aureus	GCF_000967325.1_ASM96732v1	NC_020529.1	Staphylococcus aureus subsp. aureus ST228, complete sequence
Staphylococcus aureus	GCF_000967325.1_ASM96732v1	NC_020530.1	Staphylococcus aureus subsp. aureus ST228 plasmid pI1T1, complete sequence
Staphylococcus aureus	GCF_000967345.1_ASM96734v1	NC_020564.1	Staphylococcus aureus subsp. aureus ST228, complete sequence
Staphylococcus aureus	GCF_000967345.1_ASM96734v1	NC_020531.1	Staphylococcus aureus subsp. aureus ST228 plasmid pI2T2, complete sequence
Staphylococcus aureus	GCF_000967365.1_ASM96736v1	NC_020532.1	Staphylococcus aureus subsp. aureus ST228, complete sequence
Staphylococcus aureus	GCF_000967365.1_ASM96736v1	NC_020565.1	Staphylococcus aureus subsp. aureus ST228 plasmid pI3T3, complete sequence
Staphylococcus aureus	GCF_000967385.1_ASM96738v1	NC_020536.1	Staphylococcus aureus subsp. aureus ST228, complete sequence
Staphylococcus aureus	GCF_000967385.1_ASM96738v1	NC_020567.1	Staphylococcus aureus subsp. aureus ST228 plasmid pI6T6, complete sequence
Staphylococcus aureus	GCF_000967405.1_ASM96740v1	NC_020537.1	Staphylococcus aureus subsp. aureus ST228, complete sequence
Staphylococcus aureus	GCF_000967405.1_ASM96740v1	NC_020538.1	Staphylococcus aureus subsp. aureus ST228 plasmid pI7S6, complete sequence
Staphylococcus aureus	GCF_000969225.1_ASM96922v1	NZ_CP011147.1	Staphylococcus aureus strain FCFHV36 chromosome, complete genome
Staphylococcus aureus	GCF_001018645.2_ASM101864v2	NZ_CP026964.1	Staphylococcus aureus strain FDAARGOS_2 chromosome, complete genome
Staphylococcus aureus	GCF_001018645.2_ASM101864v2	NZ_CP026965.1	Staphylococcus aureus strain FDAARGOS_2 plasmid unnamed1
Staphylococcus aureus	GCF_001018645.2_ASM101864v2	NZ_CP026966.1	Staphylococcus aureus strain FDAARGOS_2 plasmid unnamed2
Staphylococcus aureus	GCF_001018645.2_ASM101864v2	NZ_CP026967.1	Staphylococcus aureus strain FDAARGOS_2 plasmid unnamed3
Staphylococcus aureus	GCF_001018655.2_ASM101865v2	NZ_CP026962.1	Staphylococcus aureus strain FDAARGOS_6 chromosome, complete genome
Staphylococcus aureus	GCF_001018655.2_ASM101865v2	NZ_CP026963.1	Staphylococcus aureus strain FDAARGOS_6 plasmid unnamed1
Staphylococcus aureus	GCF_001018685.2_ASM101868v2	NZ_CP026076.1	Staphylococcus aureus strain FDAARGOS_4 chromosome, complete genome
Staphylococcus aureus	GCF_001018725.2_ASM101872v2	NZ_CP026961.1	Staphylococcus aureus strain FDAARGOS_10 chromosome, complete genome
Staphylococcus aureus	GCF_001018735.2_ASM101873v2	NZ_CP026080.1	Staphylococcus aureus strain FDAARGOS_12 chromosome, complete genome
Staphylococcus aureus	GCF_001018735.2_ASM101873v2	NZ_CP026081.1	Staphylococcus aureus strain FDAARGOS_12 plasmid unnamed
Staphylococcus aureus	GCF_001018775.2_ASM101877v2	NZ_CP026063.1	Staphylococcus aureus strain FDAARGOS_14 chromosome, complete genome
Staphylococcus aureus	GCF_001018805.1_ASM101880v2	NZ_CP026960.1	Staphylococcus aureus strain FDAARGOS_15 chromosome, complete genome
Staphylococcus aureus	GCF_001018835.2_ASM101883v2	NZ_CP026064.1	Staphylococcus aureus strain FDAARGOS_19 chromosome, complete genome
Staphylococcus aureus	GCF_001018835.2_ASM101883v2	NZ_CP026065.1	Staphylococcus aureus strain FDAARGOS_19 plasmid unnamed
Staphylococcus aureus	GCF_001018845.2_ASM101884v2	NZ_CP026067.1	Staphylococcus aureus strain FDAARGOS_21 chromosome, complete genome
Staphylococcus aureus	GCF_001018915.2_ASM101891v2	NZ_CP026070.1	Staphylococcus aureus strain FDAARGOS_27 chromosome, complete genome
Staphylococcus aureus	GCF_001018975.2_ASM101897v2	NZ_CP026071.1	Staphylococcus aureus strain FDAARGOS_30 chromosome, complete genome
Staphylococcus aureus	GCF_001019125.2_ASM101912v2	NZ_CP026957.1	Staphylococcus aureus strain FDAARGOS_43 chromosome, complete genome
Staphylococcus aureus	GCF_001019205.2_ASM101920v2	NZ_CP026953.1	Staphylococcus aureus strain FDAARGOS_48 chromosome, complete genome
Staphylococcus aureus	GCF_001019205.2_ASM101920v2	NZ_CP026954.1	Staphylococcus aureus strain FDAARGOS_48 plasmid unnamed1
Staphylococcus aureus	GCF_001019205.2_ASM101920v2	NZ_CP026955.1	Staphylococcus aureus strain FDAARGOS_48 plasmid unnamed2
Staphylococcus aureus	GCF_001019205.2_ASM101920v2	NZ_CP026956.1	Staphylococcus aureus strain FDAARGOS_48 plasmid unnamed3
Staphylococcus aureus	GCF_001019255.2_ASM101925v2	NZ_CP026968.1	Staphylococcus aureus strain FDAARGOS_1 chromosome, complete genome
Staphylococcus aureus	GCF_001019255.2_ASM101925v2	NZ_CP026969.1	Staphylococcus aureus strain FDAARGOS_1 plasmid unnamed1
Staphylococcus aureus	GCF_001019255.2_ASM101925v2	NZ_CP026970.1	Staphylococcus aureus strain FDAARGOS_1 plasmid unnamed2
Staphylococcus aureus	GCF_001019255.2_ASM101925v2	NZ_CP026971.1	Staphylococcus aureus strain FDAARGOS_1 plasmid unnamed3
Staphylococcus aureus	GCF_001019255.2_ASM101925v2	NZ_CP026972.1	Staphylococcus aureus strain FDAARGOS_1 plasmid unnamed4
Staphylococcus aureus	GCF_001019275.2_ASM101927v2	NZ_CP026077.1	Staphylococcus aureus strain FDAARGOS_7 chromosome, complete genome
Staphylococcus aureus	GCF_001019275.2_ASM101927v2	NZ_CP026078.1	Staphylococcus aureus strain FDAARGOS_7 plasmid unnamed
Staphylococcus aureus	GCF_001019305.2_ASM101930v2	NZ_CP026079.1	Staphylococcus aureus strain FDAARGOS_9 chromosome, complete genome
Staphylococcus aureus	GCF_001019395.2_ASM101939v2	NZ_CP026066.1	Staphylococcus aureus strain FDAARGOS_20 chromosome, complete genome
Staphylococcus aureus	GCF_001019415.2_ASM101941v2	NZ_CP026068.1	Staphylococcus aureus strain FDAARGOS_24 chromosome, complete genome
Staphylococcus aureus	GCF_001019435.2_ASM101943v2	NZ_CP026069.1	Staphylococcus aureus strain FDAARGOS_25 chromosome, complete genome
Staphylococcus aureus	GCF_001019485.2_ASM101948v2	NZ_CP026072.1	Staphylococcus aureus strain FDAARGOS_35 chromosome, complete genome
Staphylococcus aureus	GCF_001019495.2_ASM101949v2	NZ_CP026958.1	Staphylococcus aureus strain FDAARGOS_40 chromosome, complete genome
Staphylococcus aureus	GCF_001019495.2_ASM101949v2	NZ_CP026959.1	Staphylococcus aureus strain FDAARGOS_40 plasmid unnamed1
Staphylococcus aureus	GCF_001019535.2_ASM101953v2	NZ_CP026073.1	Staphylococcus aureus strain FDAARGOS_42 chromosome, complete genome
Staphylococcus aureus	GCF_001019575.2_ASM101957v2	NZ_CP026074.1	Staphylococcus aureus strain FDAARGOS_47 chromosome, complete genome
Staphylococcus aureus	GCF_001019575.2_ASM101957v2	NZ_CP026075.1	Staphylococcus aureus strain FDAARGOS_47 plasmid unnamed
Staphylococcus aureus	GCF_001021875.1_ASM102187v1	NZ_CP007670.1	Staphylococcus aureus strain M121 chromosome, complete genome
Staphylococcus aureus	GCF_001021875.1_ASM102187v1	NZ_CP007671.1	Staphylococcus aureus strain M121 plasmid pM121, complete sequence
Staphylococcus aureus	GCF_001021895.1_ASM102189v1	NZ_CP007674.1	Staphylococcus aureus strain CA15 chromosome, complete genome
Staphylococcus aureus	GCF_001021895.1_ASM102189v1	NZ_CP007675.1	Staphylococcus aureus strain CA15 plasmid pCA15, complete sequence
Staphylococcus aureus	GCF_001027045.1_ASM102704v1	NZ_CP011528.1	Staphylococcus aureus strain RKI4 chromosome, complete genome
Staphylococcus aureus	GCF_001027045.1_ASM102704v1	NZ_CP011529.1	Staphylococcus aureus strain RKI4 plasmid unnamed, complete sequence
Staphylococcus aureus	GCF_001027105.1_ASM102710v1	NZ_CP011526.1	Staphylococcus aureus strain DSM 20231 chromosome, complete genome
Staphylococcus aureus	GCF_001027105.1_ASM102710v1	NZ_CP011527.1	Staphylococcus aureus strain DSM 20231 plasmid unnamed, complete sequence
Staphylococcus aureus	GCF_001045795.2_ASM104579v2	NZ_CP007672.1	Staphylococcus aureus strain CA12 chromosome, complete genome
Staphylococcus aureus	GCF_001045795.2_ASM104579v2	NZ_CP007673.1	Staphylococcus aureus strain CA12 plasmid pCA12, complete sequence
Staphylococcus aureus	GCF_001045995.2_ASM104599v2	NZ_CP007676.1	Staphylococcus aureus strain HUV05 chromosome, complete genome
Staphylococcus aureus	GCF_001045995.2_ASM104599v2	NZ_CP007677.1	Staphylococcus aureus strain HUV05 plasmid pHUV05-01, complete sequence
Staphylococcus aureus	GCF_001045995.2_ASM104599v2	NZ_CP007678.1	Staphylococcus aureus strain HUV05 plasmid pHUV05-02, complete sequence
Staphylococcus aureus	GCF_001045995.2_ASM104599v2	NZ_CP007679.1	Staphylococcus aureus strain HUV05 plasmid pHUV05-03, complete sequence
Staphylococcus aureus	GCF_001046095.2_ASM104609v2	NZ_CP007657.1	Staphylococcus aureus strain V2200 chromosome, complete genome
Staphylococcus aureus	GCF_001046095.2_ASM104609v2	NZ_CP007658.1	Staphylococcus aureus strain V2200 plasmid pV2200, complete sequence
Staphylococcus aureus	GCF_001183705.3_ASM118370v3	NZ_CP012119.2	Staphylococcus aureus strain USA300_2014.C01 chromosome, complete genome
Staphylococcus aureus	GCF_001183705.3_ASM118370v3	NZ_CP012118.2	Staphylococcus aureus strain USA300_2014.C01 plasmid pC01, complete sequence
Staphylococcus aureus	GCF_001183705.3_ASM118370v3	NZ_CP025490.1	Staphylococcus aureus strain USA300_2014.C01 plasmid pC01a, complete sequence
Staphylococcus aureus	GCF_001183725.2_ASM118372v2	NZ_CP012120.2	Staphylococcus aureus strain USA300_2014.C02 chromosome, complete genome
Staphylococcus aureus	GCF_001183725.2_ASM118372v2	NZ_CP012121.2	Staphylococcus aureus strain USA300_2014.C02 plasmid pC02, complete sequence
Staphylococcus aureus	GCF_001183725.2_ASM118372v2	NZ_CP025489.1	Staphylococcus aureus strain USA300_2014.C02 plasmid pC02a, complete sequence
Staphylococcus aureus	GCF_001278745.1_ASM127874v1	NZ_CP012593.1	Staphylococcus aureus strain HOU1444-VR chromosome, complete genome
Staphylococcus aureus	GCF_001278745.1_ASM127874v1	NZ_CP012594.1	Staphylococcus aureus strain HOU1444-VR plasmid pVR-MSSA_01, complete sequence
Staphylococcus aureus	GCF_001278745.1_ASM127874v1	NZ_CP012595.1	Staphylococcus aureus strain HOU1444-VR plasmid pVR-MSSA_02, complete sequence
Staphylococcus aureus	GCF_001278745.1_ASM127874v1	NZ_CP012596.1	Staphylococcus aureus strain HOU1444-VR plasmid pVR-MSSA_03, complete sequence
Staphylococcus aureus	GCF_001281145.1_ASM128114v1	NZ_CP010890.1	Staphylococcus aureus strain SA564 chromosome, complete genome
Staphylococcus aureus	GCF_001281145.1_ASM128114v1	NZ_CP010891.1	Staphylococcus aureus strain SA564 plasmid pSA564, complete sequence
Staphylococcus aureus	GCF_001296985.1_ASM129698v1	NZ_CP010402.1	Staphylococcus aureus strain GR2 chromosome, complete genome
Staphylococcus aureus	GCF_001296985.1_ASM129698v1	NZ_CP010403.1	Staphylococcus aureus strain GR2 plasmid pGR2A, complete sequence
Staphylococcus aureus	GCF_001296985.1_ASM129698v1	NZ_CP010404.1	Staphylococcus aureus strain GR2 plasmid pGR2B, complete sequence
Staphylococcus aureus	GCF_001298325.2_ASM129832v2	NZ_CP019945.1	Staphylococcus aureus strain BA01611 chromosome, complete genome
Staphylococcus aureus	GCF_001307235.1_ASM130723v1	NZ_CP012756.1	Staphylococcus aureus strain JS395 chromosome, complete genome
Staphylococcus aureus	GCF_001307235.1_ASM130723v1	NZ_CP012757.1	Staphylococcus aureus strain JS395 plasmid unnamed, complete sequence
Staphylococcus aureus	GCF_001444345.1_ASM144434v1	NZ_CP013137.1	Staphylococcus aureus strain XQ chromosome, complete genome
Staphylococcus aureus	GCF_001456215.1_ASM145621v1	NZ_CP009828.1	Staphylococcus aureus strain MS4 chromosome, complete genome
Staphylococcus aureus	GCF_001457495.1_NCTC13435	NZ_LN831036.1	Staphylococcus aureus strain NCTC13435 chromosome 1, complete sequence
Staphylococcus aureus	GCF_001457495.1_NCTC13435	NZ_LN831037.1	Staphylococcus aureus strain NCTC13435 plasmid 2, complete sequence
Staphylococcus aureus	GCF_001457495.1_NCTC13435	NZ_LN831038.1	Staphylococcus aureus strain NCTC13435 plasmid 3, complete sequence
Staphylococcus aureus	GCF_001465635.1_ASM146563v1	NZ_CP013616.1	Staphylococcus aureus strain RIVM1295 chromosome, complete genome
Staphylococcus aureus	GCF_001465635.1_ASM146563v1	NZ_CP013617.1	Staphylococcus aureus strain RIVM1295 plasmid pRIVM1295-1, complete sequence
Staphylococcus aureus	GCF_001465635.1_ASM146563v1	NZ_CP013618.1	Staphylococcus aureus strain RIVM1295 plasmid pRIVM1295-2, complete sequence
Staphylococcus aureus	GCF_001465675.1_ASM146567v1	NZ_CP013619.1	Staphylococcus aureus strain RIVM1607 chromosome, complete genome
Staphylococcus aureus	GCF_001465675.1_ASM146567v1	NZ_CP013620.1	Staphylococcus aureus strain RIVM1607 plasmid pRIVM1607, complete sequence
Staphylococcus aureus	GCF_001465755.1_ASM146575v1	NZ_CP013621.1	Staphylococcus aureus strain RIVM3897 chromosome, complete genome
Staphylococcus aureus	GCF_001471715.2_ASM147171v2	NZ_CP027101.1	Staphylococcus aureus strain FDAARGOS_140 chromosome, complete genome
Staphylococcus aureus	GCF_001471715.2_ASM147171v2	NZ_CP027099.1	Staphylococcus aureus strain FDAARGOS_140 plasmid unnamed map unlocalized
Staphylococcus aureus	GCF_001471715.2_ASM147171v2	NZ_CP027100.1	Staphylococcus aureus strain FDAARGOS_140 plasmid unnamed map unlocalized
Staphylococcus aureus	GCF_001471715.2_ASM147171v2	NZ_CP027102.1	Staphylococcus aureus strain FDAARGOS_140 plasmid unnamed map unlocalized
Staphylococcus aureus	GCF_001515665.1_ASM151566v1	NZ_CP012015.1	Staphylococcus aureus strain Gv51 chromosome, complete genome
Staphylococcus aureus	GCF_001515665.1_ASM151566v1	NZ_CP012016.1	Staphylococcus aureus strain Gv51 plasmid pGv51, complete sequence
Staphylococcus aureus	GCF_001515685.1_ASM151568v1	NZ_CP012013.1	Staphylococcus aureus strain Be62 chromosome, complete genome
Staphylococcus aureus	GCF_001515685.1_ASM151568v1	NZ_CP012014.1	Staphylococcus aureus strain Be62 plasmid pBe62, complete sequence
Staphylococcus aureus	GCF_001515705.1_ASM151570v1	NZ_CP012018.1	Staphylococcus aureus strain Gv88 chromosome, complete genome
Staphylococcus aureus	GCF_001515705.1_ASM151570v1	NZ_CP012017.1	Staphylococcus aureus strain Gv88 plasmid pGv88, complete sequence
Staphylococcus aureus	GCF_001515745.1_ASM151574v1	NZ_CP012011.1	Staphylococcus aureus strain HC1340 chromosome, complete genome
Staphylococcus aureus	GCF_001515765.1_ASM151576v1	NZ_CP012012.1	Staphylococcus aureus strain HC1335 chromosome, complete genome
Staphylococcus aureus	GCF_001548295.1_ASM154829v1	NZ_AP014942.1	Staphylococcus aureus strain FDA209P chromosome, complete genome
Staphylococcus aureus	GCF_001548295.1_ASM154829v1	NZ_AP014943.1	Staphylococcus aureus strain FDA209P plasmid pFDA209P, complete sequence
Staphylococcus aureus	GCF_001548415.1_ASM154841v1	NZ_AP017320.1	Staphylococcus aureus strain MI chromosome, complete genome
Staphylococcus aureus	GCF_001548415.1_ASM154841v1	NZ_AP017321.1	Staphylococcus aureus strain MI plasmid pMI, complete sequence
Staphylococcus aureus	GCF_001549655.1_ASM154965v1	NZ_AP014652.1	Staphylococcus aureus strain TMUS2126 chromosome, complete genome
Staphylococcus aureus	GCF_001549675.1_ASM154967v1	NZ_AP014653.1	Staphylococcus aureus strain TMUS2134 chromosome, complete genome
Staphylococcus aureus	GCF_001558795.2_ASM155879v2	NZ_CP014064.2	Staphylococcus aureus strain FDAARGOS_159 chromosome, complete genome
Staphylococcus aureus	GCF_001558795.2_ASM155879v2	NZ_CP014063.1	Staphylococcus aureus strain FDAARGOS_159 plasmid unnamed, complete sequence
Staphylococcus aureus	GCF_001580495.1_ASM158049v1	NZ_CP010998.1	Staphylococcus aureus strain FORC_012 isolate human sputum chromosome, complete genome
Staphylococcus aureus	GCF_001580515.1_ASM158051v1	NZ_CP013231.1	Staphylococcus aureus strain UTSW MRSA 55 chromosome, complete genome
Staphylococcus aureus	GCF_001580515.1_ASM158051v1	NZ_CP013227.1	Staphylococcus aureus strain UTSW MRSA 55 plasmid UTSW55_1, complete sequence
Staphylococcus aureus	GCF_001580515.1_ASM158051v1	NZ_CP013228.1	UNVERIFIED_ASMBLY: Staphylococcus aureus strain UTSW MRSA 55 plasmid UTSW55_2, complete sequence
Staphylococcus aureus	GCF_001580515.1_ASM158051v1	NZ_CP013229.1	Staphylococcus aureus strain UTSW MRSA 55 plasmid UTSW55_3, complete sequence
Staphylococcus aureus	GCF_001580515.1_ASM158051v1	NZ_CP013230.1	Staphylococcus aureus strain UTSW MRSA 55 plasmid UTSW55_4, complete sequence
Staphylococcus aureus	GCF_001594205.1_ASM159420v1	NZ_CP014791.1	Staphylococcus aureus strain MCRF184 chromosome, complete genome
Staphylococcus aureus	GCF_001611325.1_ASM161132v1	NZ_CP012979.1	Staphylococcus aureus strain ST20130940 chromosome, complete genome
Staphylococcus aureus	GCF_001611325.1_ASM161132v1	NZ_CP012980.1	Staphylococcus aureus strain ST20130940 plasmid pST20130940, complete sequence
Staphylococcus aureus	GCF_001611345.1_ASM161134v1	NZ_CP012978.1	Staphylococcus aureus strain ST20130941 chromosome, complete genome
Staphylococcus aureus	GCF_001611365.1_ASM161136v1	NZ_CP012976.1	Staphylococcus aureus strain ST20130942 chromosome, complete genome
Staphylococcus aureus	GCF_001611365.1_ASM161136v1	NZ_CP012977.1	Staphylococcus aureus strain ST20130942 plasmid pST20130942, complete sequence
Staphylococcus aureus	GCF_001611385.1_ASM161138v1	NZ_CP012974.1	Staphylococcus aureus strain ST20130943 chromosome, complete genome
Staphylococcus aureus	GCF_001611385.1_ASM161138v1	NZ_CP012975.1	Staphylococcus aureus strain ST20130943 plasmid pST20130943, complete sequence
Staphylococcus aureus	GCF_001611405.1_ASM161140v1	NZ_CP012972.1	Staphylococcus aureus strain ST20130938 chromosome, complete genome
Staphylococcus aureus	GCF_001611405.1_ASM161140v1	NZ_CP012973.1	Staphylococcus aureus strain ST20130938 plasmid pST20130938, complete sequence
Staphylococcus aureus	GCF_001611425.1_ASM161142v1	NZ_CP012970.1	Staphylococcus aureus strain ST20130939 chromosome, complete genome
Staphylococcus aureus	GCF_001611425.1_ASM161142v1	NZ_CP012971.1	Staphylococcus aureus strain ST20130939 plasmid pST20130939, complete sequence
Staphylococcus aureus	GCF_001618305.1_ASM161830v1	NZ_CP015173.1	Staphylococcus aureus strain RIVM6519 chromosome, complete genome
Staphylococcus aureus	GCF_001618305.1_ASM161830v1	NZ_CP015174.1	Staphylococcus aureus strain RIVM6519 plasmid pRIVM6519-1, complete sequence
Staphylococcus aureus	GCF_001618305.1_ASM161830v1	NZ_CP015175.1	Staphylococcus aureus strain RIVM6519 plasmid pRIVM6519-2, complete sequence
Staphylococcus aureus	GCF_001640885.1_ASM164088v1	NZ_CP011685.1	Staphylococcus aureus strain ZJ5499 chromosome, complete genome
Staphylococcus aureus	GCF_001640905.1_ASM164090v1	NZ_CP013953.1	Staphylococcus aureus strain NCCP14558 isolate sequencing chromosome, complete genome
Staphylococcus aureus	GCF_001640905.1_ASM164090v1	NZ_CP013954.1	Staphylococcus aureus strain NCCP14558 isolate sequencing plasmid pNCCP14558, complete sequence
Staphylococcus aureus	GCF_001640925.1_ASM164092v1	NZ_CP013955.1	Staphylococcus aureus strain NCCP14562 isolate Sequencing chromosome, complete genome
Staphylococcus aureus	GCF_001640925.1_ASM164092v1	NZ_CP013956.1	Staphylococcus aureus strain NCCP14562 isolate Sequencing plasmid pNCCP14562, complete sequence
Staphylococcus aureus	GCF_001641025.1_ASM164102v1	NZ_CP013957.1	Staphylococcus aureus strain V521 isolate Sequencing chromosome, complete genome
Staphylococcus aureus	GCF_001641025.1_ASM164102v1	NZ_CP013958.1	Staphylococcus aureus strain V521 isolate Sequencing plasmid pV521, complete sequence
Staphylococcus aureus	GCF_001656045.1_ASM165604v1	NZ_CP015645.1	Staphylococcus aureus strain 08-02119 chromosome, complete genome
Staphylococcus aureus	GCF_001656075.1_ASM165607v1	NZ_CP015646.1	Staphylococcus aureus strain 08-02300 chromosome, complete genome
Staphylococcus aureus	GCF_001717645.1_ASM171764v3	NZ_CP016855.1	Staphylococcus aureus strain 5118.N chromosome, complete genome
Staphylococcus aureus	GCF_001717645.1_ASM171764v3	NZ_CP025482.1	Staphylococcus aureus strain 5118.N plasmid p5118.Na, complete sequence
Staphylococcus aureus	GCF_001717645.1_ASM171764v3	NZ_CP016854.1	Staphylococcus aureus strain 5118.N plasmid p5118.Nb, complete sequence
Staphylococcus aureus	GCF_001717665.1_ASM171766v2	NZ_CP016856.1	Staphylococcus aureus strain 2148.N chromosome, complete genome
Staphylococcus aureus	GCF_001717665.1_ASM171766v2	NZ_CP025481.1	Staphylococcus aureus strain 2148.N plasmid p2148.N, complete sequence
Staphylococcus aureus	GCF_001717685.1_ASM171768v3	NZ_CP016858.1	Staphylococcus aureus strain 1971.C01 chromosome, complete genome
Staphylococcus aureus	GCF_001717685.1_ASM171768v3	NZ_CP025486.1	Staphylococcus aureus strain 1971.C01 plasmid p1971.C01a
Staphylococcus aureus	GCF_001717685.1_ASM171768v3	NZ_CP016859.1	Staphylococcus aureus strain 1971.C01 plasmid p1971.C01b, complete sequence
Staphylococcus aureus	GCF_001717685.1_ASM171768v3	NZ_CP016857.1	Staphylococcus aureus strain 1971.C01 plasmid p1971.C01c, complete sequence
Staphylococcus aureus	GCF_001717705.1_ASM171770v2	NZ_CP016861.1	Staphylococcus aureus strain 1969.N chromosome, complete genome
Staphylococcus aureus	GCF_001717705.1_ASM171770v2	NZ_CP025487.1	Staphylococcus aureus strain 1969.N plasmid p1969.Na, complete sequence
Staphylococcus aureus	GCF_001717705.1_ASM171770v2	NZ_CP016860.1	Staphylococcus aureus strain 1969.N plasmid p1969.Nb, complete sequence
Staphylococcus aureus	GCF_001717725.1_ASM171772v2	NZ_CP016863.1	Staphylococcus aureus strain 1625.C01 chromosome, complete genome
Staphylococcus aureus	GCF_001717725.1_ASM171772v2	NZ_CP016862.1	Staphylococcus aureus strain 1625.C01 plasmid p1625.C01, complete sequence
Staphylococcus aureus	GCF_001717975.2_ASM171797v3	NZ_CP017094.1	Staphylococcus aureus strain 2148.C01 chromosome, complete genome
Staphylococcus aureus	GCF_001717975.2_ASM171797v3	NZ_CP025488.1	Staphylococcus aureus strain 2148.C01 plasmid p2148.C01a, complete sequence
Staphylococcus aureus	GCF_001717975.2_ASM171797v3	NZ_CP017095.1	Staphylococcus aureus strain 2148.C01 plasmid p2148.C01b, complete sequence
Staphylococcus aureus	GCF_001725965.1_ASM172596v1	NZ_CP012692.1	Staphylococcus aureus strain FORC_027 chromosome, complete genome
Staphylococcus aureus	GCF_001735655.2_ASM173565v2	NZ_CP025495.1	Staphylococcus aureus strain 3020.C01 chromosome, complete genome
Staphylococcus aureus	GCF_001735655.2_ASM173565v2	NZ_CP025496.1	Staphylococcus aureus strain 3020.C01 plasmid p3020.C01a, complete sequence
Staphylococcus aureus	GCF_001735655.2_ASM173565v2	NZ_CP025497.1	Staphylococcus aureus strain 3020.C01 plasmid p3020.C01b, complete sequence
Staphylococcus aureus	GCF_001879545.1_ASM187954v1	NZ_CP013132.1	Staphylococcus aureus strain FORC_026 chromosome, complete genome
Staphylococcus aureus	GCF_001880265.1_ASM188026v1	NZ_CP013182.1	Staphylococcus aureus strain SA40TW chromosome, complete genome
Staphylococcus aureus	GCF_001887075.1_ASM188707v1	NZ_CP013218.1	Staphylococcus aureus strain LA-MRSA ST398 isolate E154 chromosome, complete genome
Staphylococcus aureus	GCF_001887075.1_ASM188707v1	NZ_CP014695.1	Staphylococcus aureus strain LA-MRSA ST398 isolate E154 plasmid paadD, complete sequence
Staphylococcus aureus	GCF_001887075.1_ASM188707v1	NZ_CP014694.1	Staphylococcus aureus strain LA-MRSA ST398 isolate E154 plasmid plinE154, complete sequence
Staphylococcus aureus	GCF_001900185.1_ASM190018v1	NZ_CP018205.1	Staphylococcus aureus strain HG001 isolate RN1 chromosome, complete genome
Staphylococcus aureus	GCF_001956755.1_ASM195675v1	NZ_CP019117.1	Staphylococcus aureus strain SJTUF_J27 chromosome, complete genome
Staphylococcus aureus	GCF_001956815.1_ASM195681v1	NZ_CP009423.1	Staphylococcus aureus strain USA300_SUR1 chromosome, complete genome
Staphylococcus aureus	GCF_001956815.1_ASM195681v1	NZ_CP009424.1	Staphylococcus aureus strain USA300_SUR1 plasmid pSUR1A, complete sequence
Staphylococcus aureus	GCF_001956815.1_ASM195681v1	NZ_CP009425.1	Staphylococcus aureus strain USA300_SUR1 plasmid pSUR1B, complete sequence
Staphylococcus aureus	GCF_001975005.1_ASM197500v1	NZ_CP018766.1	Staphylococcus aureus strain UCI62 chromosome, complete genome
Staphylococcus aureus	GCF_001975005.1_ASM197500v1	NZ_CP018767.1	Staphylococcus aureus strain UCI62 plasmid pUCI62, complete sequence
Staphylococcus aureus	GCF_001975045.1_ASM197504v1	NZ_CP018768.1	Staphylococcus aureus strain UCI 28 isolate ST5 chromosome, complete genome
Staphylococcus aureus	GCF_001975045.1_ASM197504v1	NZ_CP018769.1	Staphylococcus aureus strain UCI 28 isolate ST5 plasmid pUCI28, complete sequence
Staphylococcus aureus	GCF_001986135.1_ASM198613v1	NZ_CP019563.1	Staphylococcus aureus strain SR434 chromosome, complete genome
Staphylococcus aureus	GCF_001986135.1_ASM198613v1	NZ_CP019564.1	Staphylococcus aureus strain SR434 plasmid pSR01, complete sequence
Staphylococcus aureus	GCF_001986135.1_ASM198613v1	NZ_CP019565.1	Staphylococcus aureus strain SR434 plasmid pSR02, complete sequence
Staphylococcus aureus	GCF_001986135.1_ASM198613v1	NZ_CP019566.1	Staphylococcus aureus strain SR434 plasmid pSR03, complete sequence
Staphylococcus aureus	GCF_001986135.1_ASM198613v1	NZ_CP019567.1	Staphylococcus aureus strain SR434 plasmid pSR04, complete sequence
Staphylococcus aureus	GCF_002000565.1_ASM200056v1	NZ_CP014392.1	Staphylococcus aureus strain USA300-SUR9 chromosome, complete genome
Staphylococcus aureus	GCF_002000565.1_ASM200056v1	NZ_CP014393.1	Staphylococcus aureus strain USA300-SUR9 plasmid pUSA01-1-SUR9, complete sequence
Staphylococcus aureus	GCF_002000565.1_ASM200056v1	NZ_CP014394.1	Staphylococcus aureus strain USA300-SUR9 plasmid pUSA04-2-SUR9, complete sequence
Staphylococcus aureus	GCF_002000565.1_ASM200056v1	NZ_CP014395.1	Staphylococcus aureus strain USA300-SUR9 plasmid pUSA05-1-SUR9, complete sequence
Staphylococcus aureus	GCF_002000565.1_ASM200056v1	NZ_CP014396.1	Staphylococcus aureus strain USA300-SUR9 plasmid pUSA06-1-SUR9, complete sequence
Staphylococcus aureus	GCF_002000585.1_ASM200058v1	NZ_CP014397.1	Staphylococcus aureus strain USA300-SUR10 chromosome, complete genome
Staphylococcus aureus	GCF_002000585.1_ASM200058v1	NZ_CP014398.1	Staphylococcus aureus strain USA300-SUR10 plasmid pUSA01-1-SUR10, complete sequence
Staphylococcus aureus	GCF_002000585.1_ASM200058v1	NZ_CP014399.1	Staphylococcus aureus strain USA300-SUR10 plasmid pUSA04-2-SUR10, complete sequence
Staphylococcus aureus	GCF_002000585.1_ASM200058v1	NZ_CP014400.1	Staphylococcus aureus strain USA300-SUR10 plasmid pUSA05-1-SUR10, complete sequence
Staphylococcus aureus	GCF_002000585.1_ASM200058v1	NZ_CP014401.1	Staphylococcus aureus strain USA300-SUR10 plasmid pUSA06-1-SUR10, complete sequence
Staphylococcus aureus	GCF_002000605.1_ASM200060v1	NZ_CP014402.1	Staphylococcus aureus strain USA300-SUR11 chromosome, complete genome
Staphylococcus aureus	GCF_002000605.1_ASM200060v1	NZ_CP014403.1	Staphylococcus aureus strain USA300-SUR11 plasmid pUSA01-1-SUR11, complete sequence
Staphylococcus aureus	GCF_002000605.1_ASM200060v1	NZ_CP014404.1	Staphylococcus aureus strain USA300-SUR11 plasmid pUSA04-2-SUR11, complete sequence
Staphylococcus aureus	GCF_002000605.1_ASM200060v1	NZ_CP014405.1	Staphylococcus aureus strain USA300-SUR11 plasmid pUSA05-1-SUR11, complete sequence
Staphylococcus aureus	GCF_002000605.1_ASM200060v1	NZ_CP014406.1	Staphylococcus aureus strain USA300-SUR11 plasmid pUSA06-1-SUR11, complete sequence
Staphylococcus aureus	GCF_002000625.1_ASM200062v1	NZ_CP014407.1	Staphylococcus aureus strain USA300-SUR12 chromosome, complete genome
Staphylococcus aureus	GCF_002000625.1_ASM200062v1	NZ_CP014408.1	Staphylococcus aureus strain USA300-SUR12 plasmid pUSA04-1-SUR12, complete sequence
Staphylococcus aureus	GCF_002000645.1_ASM200064v1	NZ_CP014409.1	Staphylococcus aureus strain USA300-SUR13 chromosome, complete genome
Staphylococcus aureus	GCF_002000645.1_ASM200064v1	NZ_CP014410.1	Staphylococcus aureus strain USA300-SUR13 plasmid pUSA01-1-SUR13, complete sequence
Staphylococcus aureus	GCF_002000645.1_ASM200064v1	NZ_CP014411.1	Staphylococcus aureus strain USA300-SUR13 plasmid pUSA04-1-SUR13, complete sequence
Staphylococcus aureus	GCF_002000665.1_ASM200066v1	NZ_CP014412.1	Staphylococcus aureus strain USA300-SUR14 chromosome, complete genome
Staphylococcus aureus	GCF_002000665.1_ASM200066v1	NZ_CP014413.1	Staphylococcus aureus strain USA300-SUR14 plasmid pUSA01-1-SUR14, complete sequence
Staphylococcus aureus	GCF_002000665.1_ASM200066v1	NZ_CP014414.1	Staphylococcus aureus strain USA300-SUR14 plasmid pUSA04-1-SUR14, complete sequence
Staphylococcus aureus	GCF_002000685.1_ASM200068v1	NZ_CP014415.1	Staphylococcus aureus strain USA300-SUR15 chromosome, complete genome
Staphylococcus aureus	GCF_002000685.1_ASM200068v1	NZ_CP014416.1	Staphylococcus aureus strain USA300-SUR15 plasmid pUSA04-1-SUR15, complete sequence
Staphylococcus aureus	GCF_002000685.1_ASM200068v1	NZ_CP014417.1	Staphylococcus aureus strain USA300-SUR15 plasmid pUSA05-1-SUR15, complete sequence
Staphylococcus aureus	GCF_002000685.1_ASM200068v1	NZ_CP014418.1	Staphylococcus aureus strain USA300-SUR15 plasmid pUSA07-1-SUR15, complete sequence
Staphylococcus aureus	GCF_002000685.1_ASM200068v1	NZ_CP014419.1	Staphylococcus aureus strain USA300-SUR15 plasmid pUSA08-1-SUR15, complete sequence
Staphylococcus aureus	GCF_002000705.1_ASM200070v1	NZ_CP014420.1	Staphylococcus aureus strain USA300-SUR16 chromosome, complete genome
Staphylococcus aureus	GCF_002000705.1_ASM200070v1	NZ_CP014421.1	Staphylococcus aureus strain USA300-SUR16 plasmid pUSA01-1-SUR16, complete sequence
Staphylococcus aureus	GCF_002000705.1_ASM200070v1	NZ_CP014422.1	Staphylococcus aureus strain USA300-SUR16 plasmid pUSA04-1-SUR16, complete sequence
Staphylococcus aureus	GCF_002000725.1_ASM200072v1	NZ_CP014423.1	Staphylococcus aureus strain USA300-SUR17 chromosome, complete genome
Staphylococcus aureus	GCF_002000725.1_ASM200072v1	NZ_CP014424.1	Staphylococcus aureus strain USA300-SUR17 plasmid pUSA01-1-SUR17, complete sequence
Staphylococcus aureus	GCF_002000725.1_ASM200072v1	NZ_CP014425.1	Staphylococcus aureus strain USA300-SUR17 plasmid pUSA04-1-SUR17, complete sequence
Staphylococcus aureus	GCF_002000745.1_ASM200074v1	NZ_CP014426.1	Staphylococcus aureus strain USA300-SUR18 chromosome, complete genome
Staphylococcus aureus	GCF_002000745.1_ASM200074v1	NZ_CP014427.1	Staphylococcus aureus strain USA300-SUR18 plasmid pUSA01-1-SUR18, complete sequence
Staphylococcus aureus	GCF_002000745.1_ASM200074v1	NZ_CP014428.1	Staphylococcus aureus strain USA300-SUR18 plasmid pUSA04-1-SUR18, complete sequence
Staphylococcus aureus	GCF_002000765.1_ASM200076v1	NZ_CP014429.1	Staphylococcus aureus strain USA300-SUR19 chromosome, complete genome
Staphylococcus aureus	GCF_002000765.1_ASM200076v1	NZ_CP014430.1	Staphylococcus aureus strain USA300-SUR19 plasmid pUSA01-1-SUR19, complete sequence
Staphylococcus aureus	GCF_002000765.1_ASM200076v1	NZ_CP014431.1	Staphylococcus aureus strain USA300-SUR19 plasmid pUSA04-1-SUR19, complete sequence
Staphylococcus aureus	GCF_002000785.1_ASM200078v1	NZ_CP014432.1	Staphylococcus aureus strain USA300-SUR20 chromosome, complete genome
Staphylococcus aureus	GCF_002000785.1_ASM200078v1	NZ_CP014433.1	Staphylococcus aureus strain USA300-SUR20 plasmid pUSA01-1-SUR20, complete sequence
Staphylococcus aureus	GCF_002000785.1_ASM200078v1	NZ_CP014434.1	Staphylococcus aureus strain USA300-SUR20 plasmid pUSA04-1-SUR20, complete sequence
Staphylococcus aureus	GCF_002000805.1_ASM200080v1	NZ_CP014435.1	Staphylococcus aureus strain USA300-SUR21 chromosome, complete genome
Staphylococcus aureus	GCF_002000805.1_ASM200080v1	NZ_CP014436.1	Staphylococcus aureus strain USA300-SUR21 plasmid pUSA01-1-SUR21, complete sequence
Staphylococcus aureus	GCF_002000805.1_ASM200080v1	NZ_CP014437.1	Staphylococcus aureus strain USA300-SUR21 plasmid pUSA04-1-SUR21, complete sequence
Staphylococcus aureus	GCF_002000825.1_ASM200082v1	NZ_CP014438.1	Staphylococcus aureus strain USA300-SUR22 chromosome, complete genome
Staphylococcus aureus	GCF_002000825.1_ASM200082v1	NZ_CP014439.1	Staphylococcus aureus strain USA300-SUR22 plasmid pUSA01-1-SUR22, complete sequence
Staphylococcus aureus	GCF_002000825.1_ASM200082v1	NZ_CP014440.1	Staphylococcus aureus strain USA300-SUR22 plasmid pUSA04-1-SUR22, complete sequence
Staphylococcus aureus	GCF_002000845.1_ASM200084v1	NZ_CP014441.1	Staphylococcus aureus strain USA300-SUR23 chromosome, complete genome
Staphylococcus aureus	GCF_002000845.1_ASM200084v1	NZ_CP014442.1	Staphylococcus aureus strain USA300-SUR23 plasmid pUSA01-1-SUR23, complete sequence
Staphylococcus aureus	GCF_002000845.1_ASM200084v1	NZ_CP014443.1	Staphylococcus aureus strain USA300-SUR23 plasmid pUSA04-1-SUR23, complete sequence
Staphylococcus aureus	GCF_002000865.1_ASM200086v1	NZ_CP014444.1	Staphylococcus aureus strain USA300-SUR24 chromosome, complete genome
Staphylococcus aureus	GCF_002000865.1_ASM200086v1	NZ_CP014445.1	Staphylococcus aureus strain USA300-SUR24 plasmid pUSA04-1-SUR24, complete sequence
Staphylococcus aureus	GCF_002000865.1_ASM200086v1	NZ_CP014446.1	Staphylococcus aureus strain USA300-SUR24 plasmid pUSA05-1-SUR24, complete sequence
Staphylococcus aureus	GCF_002000865.1_ASM200086v1	NZ_CP014447.1	Staphylococcus aureus strain USA300-SUR24 plasmid pUSA07-1-SUR24, complete sequence
Staphylococcus aureus	GCF_002000865.1_ASM200086v1	NZ_CP014448.1	Staphylococcus aureus strain USA300-SUR24 plasmid pUSA08-1-SUR24, complete sequence
Staphylococcus aureus	GCF_002025125.1_ASM202512v1	NZ_CP020019.1	Staphylococcus aureus strain 08S00974 chromosome, complete genome
Staphylococcus aureus	GCF_002025145.1_ASM202514v1	NZ_CP020020.1	Staphylococcus aureus strain ATCC 6538 chromosome, complete genome
Staphylococcus aureus	GCF_002025145.1_ASM202514v1	NZ_CP020021.1	Staphylococcus aureus strain ATCC 6538 plasmid unnamed1, complete sequence
Staphylococcus aureus	GCF_002085525.1_ASM208552v1	NZ_CP020619.1	Staphylococcus aureus strain JE2 chromosome, complete genome
Staphylococcus aureus	GCF_002088995.1_ASM208899v1	NZ_CP019590.1	Staphylococcus aureus strain C2406 chromosome, complete genome
Staphylococcus aureus	GCF_002089035.2_ASM208903v2	NZ_CP019591.2	Staphylococcus aureus strain 293G chromosome, complete genome
Staphylococcus aureus	GCF_002089055.1_ASM208905v1	NZ_CP019592.1	Staphylococcus aureus strain GD5 chromosome, complete genome
Staphylococcus aureus	GCF_002089075.2_ASM208907v2	NZ_CP019593.2	Staphylococcus aureus strain GD705 chromosome, complete genome
Staphylococcus aureus	GCF_002089095.2_ASM208909v2	NZ_CP019595.2	Staphylococcus aureus strain GD1677 chromosome, complete genome
Staphylococcus aureus	GCF_002089115.2_ASM208911v2	NZ_CP019594.2	Staphylococcus aureus strain GD1539 chromosome, complete genome
Staphylococcus aureus	GCF_002097595.2_ASM209759v2	NZ_CP015447.2	Staphylococcus aureus strain M92 chromosome, complete genome
Staphylococcus aureus	GCF_002140115.1_ASM214011v1	NZ_CP015817.1	Staphylococcus aureus strain FORC_039 chromosome, complete genome
Staphylococcus aureus	GCF_002140115.1_ASM214011v1	NZ_CP015818.1	Staphylococcus aureus strain FORC_039 plasmid unnamed, complete sequence
Staphylococcus aureus	GCF_002202075.1_ASM220207v1	NZ_CP021905.1	Staphylococcus aureus strain Seattle 1945 isolate G477 chromosome, complete genome
Staphylococcus aureus	GCF_002202075.1_ASM220207v1	NZ_CP021906.1	Staphylococcus aureus strain Seattle 1945 isolate G477 plasmid pG477, complete sequence
Staphylococcus aureus	GCF_002202095.1_ASM220209v1	NZ_CP021907.1	Staphylococcus aureus strain Seattle 1945 isolate G478 chromosome, complete genome
Staphylococcus aureus	GCF_002202095.1_ASM220209v1	NZ_CP021908.1	Staphylococcus aureus strain Seattle 1945 isolate G478 plasmid pG478, complete sequence
Staphylococcus aureus	GCF_002204555.1_ASM220455v1	NZ_CP017090.1	Staphylococcus aureus strain ISU935 isolate ST5 chromosome, complete genome
Staphylococcus aureus	GCF_002204575.1_ASM220457v1	NZ_CP017091.1	Staphylococcus aureus strain ISU926 isolate ST398 chromosome, complete genome
Staphylococcus aureus	GCF_002209325.1_ASM220932v1	NZ_CP017115.1	Staphylococcus aureus strain FORC_045 chromosome, complete genome
Staphylococcus aureus	GCF_002214665.1_ASM221466v1	NZ_CP016398.1	Staphylococcus aureus strain FORC_040 chromosome, complete genome
Staphylococcus aureus	GCF_002214665.1_ASM221466v1	NZ_CP016399.1	Staphylococcus aureus strain FORC_040 plasmid unnamed1, complete sequence
Staphylococcus aureus	GCF_002310395.1_ASM231039v1	NZ_CP023391.1	Staphylococcus aureus strain Newman_D2C chromosome, complete genome
Staphylococcus aureus	GCF_002310435.1_ASM231043v1	NZ_CP023390.1	Staphylococcus aureus subsp. aureus str. Newman strain NYU_Newman chromosome, complete genome
Staphylococcus aureus	GCF_002355355.1_ASM235535v1	NZ_AP017377.1	Staphylococcus aureus strain OC8 chromosome, complete genome
Staphylococcus aureus	GCF_002356655.1_ASM235665v1	NZ_AP015012.1	Staphylococcus aureus strain No. 10 chromosome
Staphylococcus aureus	GCF_002356655.1_ASM235665v1	NZ_AP015013.1	Staphylococcus aureus strain No. 10 plasmid pno10, complete sequence
Staphylococcus aureus	GCF_002356675.1_ASM235667v1	NZ_AP014921.1	Staphylococcus aureus strain JH4899 chromosome, complete genome
Staphylococcus aureus	GCF_002356675.1_ASM235667v1	NZ_AP014922.1	Staphylococcus aureus strain JH4899 plasmid pJSA01, complete sequence
Staphylococcus aureus	GCF_002386245.1_ASM238624v1	NZ_CP023500.1	Staphylococcus aureus strain FDAARGOS_412 chromosome, complete genome
Staphylococcus aureus	GCF_002407105.1_ASM240710v1	NZ_CP023560.1	Staphylococcus aureus strain NMR08 chromosome
Staphylococcus aureus	GCF_002442975.1_ASM244297v1	NZ_CP020741.1	Staphylococcus aureus strain HZW450 chromosome, complete genome
Staphylococcus aureus	GCF_002633765.1_ASM263376v1	NZ_CP017685.1	Staphylococcus aureus strain CFSAN007835 chromosome, complete genome
Staphylococcus aureus	GCF_002633785.1_ASM263378v1	NZ_CP017684.1	Staphylococcus aureus strain CFSAN007847 chromosome, complete genome
Staphylococcus aureus	GCF_002633805.1_ASM263380v1	NZ_CP017682.1	Staphylococcus aureus strain CFSAN007850 chromosome, complete genome
Staphylococcus aureus	GCF_002633805.1_ASM263380v1	NZ_CP017683.1	Staphylococcus aureus strain CFSAN007850 plasmid pCFSAN007850, complete sequence
Staphylococcus aureus	GCF_002633825.1_ASM263382v1	NZ_CP017680.1	Staphylococcus aureus strain CFSAN007851 chromosome, complete genome
Staphylococcus aureus	GCF_002633825.1_ASM263382v1	NZ_CP017681.1	Staphylococcus aureus strain CFSAN007851 plasmid pCFSAN007851, complete sequence
Staphylococcus aureus	GCF_002633845.1_ASM263384v1	NZ_CP017679.1	Staphylococcus aureus strain CFSAN007883 chromosome, complete genome
Staphylococcus aureus	GCF_002633865.1_ASM263386v1	NZ_CP017677.1	Staphylococcus aureus strain CFSAN007894 chromosome, complete genome
Staphylococcus aureus	GCF_002633865.1_ASM263386v1	NZ_CP017678.1	Staphylococcus aureus strain CFSAN007894 plasmid pCFSAN007894, complete sequence
Staphylococcus aureus	GCF_002786465.1_ASM278646v1	NZ_CP022290.1	Staphylococcus aureus strain EDCC5458 chromosome, complete genome
Staphylococcus aureus	GCF_002786535.1_ASM278653v1	NZ_CP022291.1	Staphylococcus aureus strain EDCC5464 chromosome, complete genome
Staphylococcus aureus	GCF_002795285.1_ASM279528v1	NZ_CP019574.1	Staphylococcus aureus strain USA400-0051 chromosome, complete genome
Staphylococcus aureus	GCF_002795285.1_ASM279528v1	NZ_CP019575.1	Staphylococcus aureus strain USA400-0051 plasmid unnamed, complete sequence
Staphylococcus aureus	GCF_002803885.1_ASM280388v1	NZ_CP024998.1	Staphylococcus aureus strain 55-99-44 chromosome, complete genome
Staphylococcus aureus	GCF_002803885.1_ASM280388v1	NZ_CP024999.1	Staphylococcus aureus strain 55-99-44 plasmid punamed1, complete sequence
Staphylococcus aureus	GCF_002850395.1_ASM285039v1	NZ_CP020713.1	Staphylococcus aureus strain K17 chromosome, complete genome
Staphylococcus aureus	GCF_002850415.1_ASM285041v1	NZ_CP020714.1	Staphylococcus aureus strain K18 chromosome, complete genome
Staphylococcus aureus	GCF_002895385.1_ASM289538v1	NZ_CP018629.1	Staphylococcus aureus strain MRSA107 chromosome, complete genome
Staphylococcus aureus	GCF_002952015.1_ASM295201v1	NZ_CP020656.1	Staphylococcus aureus strain K5 chromosome, complete genome
Staphylococcus aureus	GCF_002993865.1_ASM299386v1	NZ_CP027476.1	Staphylococcus aureus subsp. aureus USA300 strain NRS384 chromosome
Staphylococcus aureus	GCF_002993865.1_ASM299386v1	NZ_CP027474.1	Staphylococcus aureus subsp. aureus USA300 strain NRS384 plasmid p1
Staphylococcus aureus	GCF_002993865.1_ASM299386v1	NZ_CP027475.1	Staphylococcus aureus subsp. aureus USA300 strain NRS384 plasmid p2
Staphylococcus aureus	GCF_003010875.1_ASM301087v1	NZ_CP020354.1	Staphylococcus aureus strain FORC59 chromosome, complete genome
Staphylococcus aureus	GCF_003010875.1_ASM301087v1	NZ_CP020355.1	Staphylococcus aureus strain FORC59 plasmid pFORC59, complete sequence
Staphylococcus aureus	GCF_003029645.1_ASM302964v1	NZ_CP028163.1	Staphylococcus aureus strain CFSAN064038 chromosome, complete genome
Staphylococcus aureus	GCF_003029645.1_ASM302964v1	NZ_CP028164.1	Staphylococcus aureus strain CFSAN064038 plasmid pGMI17-006, complete sequence
Staphylococcus aureus	GCF_003029665.1_ASM302966v1	NZ_CP020553.1	Staphylococcus aureus strain SA112 chromosome
Staphylococcus aureus	GCF_003030065.1_ASM303006v1	NZ_CP028190.1	Staphylococcus aureus strain CFSAN018749 chromosome, complete genome
Staphylococcus aureus	GCF_003030065.1_ASM303006v1	NZ_CP028191.1	Staphylococcus aureus strain CFSAN018749 plasmid pGMI14-005, complete sequence
Staphylococcus aureus	GCF_003030085.1_ASM303008v1	NZ_CP028165.1	Staphylococcus aureus strain CFSAN064037 chromosome, complete genome
Staphylococcus aureus	GCF_003030225.1_ASM303022v1	NZ_CP028189.1	Staphylococcus aureus strain CFSAN018750 chromosome, complete genome
Staphylococcus aureus	GCF_003031285.1_ASM303128v1	NZ_CP023561.1	Staphylococcus aureus strain TF3198 chromosome, complete genome
Staphylococcus aureus	GCF_003031285.1_ASM303128v1	NZ_CP023562.1	Staphylococcus aureus strain TF3198 plasmid pTF3198, complete sequence
Staphylococcus aureus	GCF_003031425.1_ASM303142v1	NZ_CP020467.1	Staphylococcus aureus strain CFSAN007896 chromosome, complete genome
Staphylococcus aureus	GCF_003031465.1_ASM303146v1	NZ_CP020544.1	Staphylococcus aureus strain CR14-035 chromosome
Staphylococcus aureus	GCF_003031485.1_ASM303148v1	NZ_CP021105.1	Staphylococcus aureus strain CC5 chromosome, complete genome
Staphylococcus aureus	GCF_003073395.1_ASM307339v1	NZ_CP029031.1	Staphylococcus aureus strain CIT chromosome, complete genome
Staphylococcus aureus	GCF_003073415.1_ASM307341v1	NZ_CP029030.1	Staphylococcus aureus strain CAR chromosome, complete genome
Staphylococcus aureus	GCF_003073435.1_ASM307343v1	NZ_CP029032.1	Staphylococcus aureus strain OXLIM chromosome, complete genome
Staphylococcus aureus	GCF_003073635.1_ASM307363v1	NZ_CP029080.1	Staphylococcus aureus strain AR466 chromosome, complete genome
Staphylococcus aureus	GCF_003073635.1_ASM307363v1	NZ_CP029079.1	Staphylococcus aureus strain AR466 plasmid unnamed1, complete sequence
Staphylococcus aureus	GCF_003073655.1_ASM307365v1	NZ_CP029082.1	Staphylococcus aureus strain AR465 chromosome, complete genome
Staphylococcus aureus	GCF_003073655.1_ASM307365v1	NZ_CP029081.1	Staphylococcus aureus strain AR465 plasmid unnamed1, complete sequence
Staphylococcus aureus	GCF_003073715.1_ASM307371v1	NZ_CP029087.1	Staphylococcus aureus strain AR461 chromosome, complete genome
Staphylococcus aureus	GCF_003073755.1_ASM307375v1	NZ_CP029084.1	Staphylococcus aureus strain AR464 chromosome, complete genome
Staphylococcus aureus	GCF_003073755.1_ASM307375v1	NZ_CP029083.1	Staphylococcus aureus strain AR464 plasmid unnamed1, complete sequence
Staphylococcus aureus	GCF_003073775.1_ASM307377v1	NZ_CP029086.1	Staphylococcus aureus strain AR462 chromosome, complete genome
Staphylococcus aureus	GCF_003073775.1_ASM307377v1	NZ_CP029085.1	Staphylococcus aureus strain AR462 plasmid unnamed1, complete sequence
Staphylococcus aureus	GCF_003111725.1_ASM311172v1	NZ_CP029166.1	Staphylococcus aureus strain SVH7513 chromosome, complete genome
Staphylococcus aureus	GCF_003111725.1_ASM311172v1	NZ_CP029167.1	Staphylococcus aureus strain SVH7513 plasmid pSVH7513a
Staphylococcus aureus	GCF_003111725.1_ASM311172v1	NZ_CP029165.1	Staphylococcus aureus strain SVH7513 plasmid pSVH7513b, complete sequence
Staphylococcus aureus	GCF_003111745.1_ASM311174v1	NZ_CP029172.1	Staphylococcus aureus strain PTDrAP2 chromosome, complete genome
Staphylococcus aureus	GCF_003111745.1_ASM311174v1	NZ_CP029168.1	Staphylococcus aureus strain PTDrAP2 plasmid pPTDrAP2a, complete sequence
Staphylococcus aureus	GCF_003111745.1_ASM311174v1	NZ_CP029169.1	Staphylococcus aureus strain PTDrAP2 plasmid pPTDrAP2b, complete sequence
Staphylococcus aureus	GCF_003111745.1_ASM311174v1	NZ_CP029170.1	Staphylococcus aureus strain PTDrAP2 plasmid pPTDrAP2c, complete sequence
Staphylococcus aureus	GCF_003111745.1_ASM311174v1	NZ_CP029171.1	Staphylococcus aureus strain PTDrAP2 plasmid pPTDrAP2d, complete sequence
Staphylococcus aureus	GCF_003184985.1_ASM318498v1	NZ_CP028468.1	Staphylococcus aureus strain IT1-S chromosome, complete genome
Staphylococcus aureus	GCF_003184985.1_ASM318498v1	NZ_CP028469.1	Staphylococcus aureus strain IT1-S plasmid pIT1-S, complete sequence
Staphylococcus aureus	GCF_003185005.1_ASM318500v1	NZ_CP028470.1	Staphylococcus aureus strain IT4-R chromosome, complete genome
Staphylococcus aureus	GCF_003185005.1_ASM318500v1	NZ_CP028471.1	Staphylococcus aureus strain IT4-R plasmid pIT4-R, complete sequence
Staphylococcus aureus	GCF_003186105.1_ASM318610v1	NZ_CP029629.1	Staphylococcus aureus strain MOK063 chromosome, complete genome
Staphylococcus aureus	GCF_003186125.1_ASM318612v1	NZ_CP029627.1	Staphylococcus aureus strain MOK042 chromosome, complete genome
Staphylococcus aureus	GCF_003186125.1_ASM318612v1	NZ_CP029628.1	Staphylococcus aureus strain MOK042 plasmid unnamed, complete sequence
Staphylococcus aureus	GCF_003193665.1_ASM319366v1	NZ_CP029649.1	Staphylococcus aureus strain AR_0472 chromosome, complete genome
Staphylococcus aureus	GCF_003193665.1_ASM319366v1	NZ_CP029648.1	Staphylococcus aureus strain AR_0472 plasmid unnamed1, complete sequence
Staphylococcus aureus	GCF_003193685.1_ASM319368v1	NZ_CP029669.1	Staphylococcus aureus strain AR_0223 chromosome, complete genome
Staphylococcus aureus	GCF_003193685.1_ASM319368v1	NZ_CP029668.1	Staphylococcus aureus strain AR_0223 plasmid unnamed1, complete sequence
Staphylococcus aureus	GCF_003193705.1_ASM319370v1	NZ_CP029675.1	Staphylococcus aureus strain AR_0219 chromosome, complete genome
Staphylococcus aureus	GCF_003193705.1_ASM319370v1	NZ_CP029674.1	Staphylococcus aureus strain AR_0219 plasmid unnamed1, complete sequence
Staphylococcus aureus	GCF_003193725.1_ASM319372v1	NZ_CP029678.1	Staphylococcus aureus strain AR_0216 chromosome, complete genome
Staphylococcus aureus	GCF_003193725.1_ASM319372v1	NZ_CP029676.1	Staphylococcus aureus strain AR_0216 plasmid unnamed1, complete sequence
Staphylococcus aureus	GCF_003193725.1_ASM319372v1	NZ_CP029677.1	Staphylococcus aureus strain AR_0216 plasmid unnamed2, complete sequence
Staphylococcus aureus	GCF_003193745.1_ASM319374v1	NZ_CP029653.1	Staphylococcus aureus strain AR_0470 chromosome, complete genome
Staphylococcus aureus	GCF_003193765.1_ASM319376v1	NZ_CP029652.1	Staphylococcus aureus strain AR_0471 chromosome, complete genome
Staphylococcus aureus	GCF_003193765.1_ASM319376v1	NZ_CP029650.1	Staphylococcus aureus strain AR_0471 plasmid unnamed1, complete sequence
Staphylococcus aureus	GCF_003193765.1_ASM319376v1	NZ_CP029651.1	Staphylococcus aureus strain AR_0471 plasmid unnamed2, complete sequence
Staphylococcus aureus	GCF_003193785.1_ASM319378v1	NZ_CP029681.1	Staphylococcus aureus strain AR_0473 chromosome, complete genome
Staphylococcus aureus	GCF_003193885.1_ASM319388v1	NZ_CP029658.1	Staphylococcus aureus strain AR_0467 chromosome, complete genome
Staphylococcus aureus	GCF_003193885.1_ASM319388v1	NZ_CP029659.1	Staphylococcus aureus strain AR_0467 plasmid unnamed1, complete sequence
Staphylococcus aureus	GCF_003193965.1_ASM319396v1	NZ_CP029667.1	Staphylococcus aureus strain AR_0225 chromosome, complete genome
Staphylococcus aureus	GCF_003193965.1_ASM319396v1	NZ_CP029666.1	Staphylococcus aureus strain AR_0225 plasmid unnamed1, complete sequence
Staphylococcus aureus	GCF_003194005.1_ASM319400v1	NZ_CP029655.1	Staphylococcus aureus strain AR_0469 chromosome, complete genome
Staphylococcus aureus	GCF_003194005.1_ASM319400v1	NZ_CP029654.1	Staphylococcus aureus strain AR_0469 plasmid unnamed1, complete sequence
Staphylococcus aureus	GCF_003194025.1_ASM319402v1	NZ_CP029680.1	Staphylococcus aureus strain AR_0215 chromosome, complete genome
Staphylococcus aureus	GCF_003194025.1_ASM319402v1	NZ_CP029679.1	Staphylococcus aureus strain AR_0215 plasmid unnamed1, complete sequence
Staphylococcus aureus	GCF_003194065.1_ASM319406v1	NZ_CP021349.1	Staphylococcus aureus strain 080880048-3 chromosome
Staphylococcus aureus	GCF_003194105.1_ASM319410v1	NZ_CP021141.1	Staphylococcus aureus strain 13420 chromosome
Staphylococcus aureus	GCF_003194105.1_ASM319410v1	NZ_CP021142.1	Staphylococcus aureus strain 13420 plasmid unnamed1, complete sequence
Staphylococcus aureus	GCF_003194105.1_ASM319410v1	NZ_CP021143.1	Staphylococcus aureus strain 13420 plasmid unnamed2, complete sequence
Staphylococcus aureus	GCF_003194145.1_ASM319414v1	NZ_CP021350.1	Staphylococcus aureus strain 101110051-1 chromosome
Staphylococcus aureus	GCF_003194165.1_ASM319416v1	NZ_CP021351.1	Staphylococcus aureus strain 101110041-3 chromosome
Staphylococcus aureus	GCF_003194185.1_ASM319418v1	NZ_CP021352.1	Staphylococcus aureus strain 0201753-2 chromosome
Staphylococcus aureus	GCF_003194205.1_ASM319420v1	NZ_CP021353.1	Staphylococcus aureus strain 121560027-1 chromosome
Staphylococcus aureus	GCF_003194405.1_ASM319440v1	NZ_CP021171.1	Staphylococcus aureus strain CHU15-056 chromosome, complete genome
Staphylococcus aureus	GCF_003203595.1_ASM320359v1	NZ_CP029664.1	Staphylococcus aureus strain AR_0226 chromosome, complete genome
Staphylococcus aureus	GCF_003203595.1_ASM320359v1	NZ_CP029665.1	Staphylococcus aureus strain AR_0226 plasmid unnamed1, complete sequence
Staphylococcus aureus	GCF_003203615.1_ASM320361v1	NZ_CP029657.1	Staphylococcus aureus strain AR_0468 chromosome, complete genome
Staphylococcus aureus	GCF_003203615.1_ASM320361v1	NZ_CP029656.1	Staphylococcus aureus strain AR_0468 plasmid unnamed1, complete sequence
Staphylococcus aureus	GCF_003203635.1_ASM320363v1	NZ_CP029663.1	Staphylococcus aureus strain AR_0228 chromosome, complete genome
Staphylococcus aureus	GCF_003203635.1_ASM320363v1	NZ_CP029661.1	Staphylococcus aureus strain AR_0228 plasmid unnamed1, complete sequence
Staphylococcus aureus	GCF_003203635.1_ASM320363v1	NZ_CP029662.1	Staphylococcus aureus strain AR_0228 plasmid unnamed2, complete sequence
Staphylococcus aureus	GCF_003203655.1_ASM320365v1	NZ_CP029671.1	Staphylococcus aureus strain AR_0222 chromosome, complete genome
Staphylococcus aureus	GCF_003203655.1_ASM320365v1	NZ_CP029670.1	Staphylococcus aureus strain AR_0222 plasmid unnamed1, complete sequence
Staphylococcus aureus	GCF_003203675.1_ASM320367v1	NZ_CP029673.1	Staphylococcus aureus strain AR_0220 chromosome, complete genome
Staphylococcus aureus	GCF_003203675.1_ASM320367v1	NZ_CP029672.1	Staphylococcus aureus strain AR_0220 plasmid unnamed1, complete sequence
Staphylococcus aureus	GCF_003264775.1_ASM326477v1	NZ_CP029685.1	Staphylococcus aureus strain CMRSA-3 chromosome, complete genome
Staphylococcus aureus	GCF_003264815.1_ASM326481v1	NZ_CP027788.1	Staphylococcus aureus strain CMRSA-6 chromosome, complete genome
Staphylococcus aureus	GCF_003288395.1_ASM328839v1	NZ_CP030323.1	Staphylococcus aureus strain AR_475 chromosome, complete genome
Staphylococcus aureus	GCF_003288395.1_ASM328839v1	NZ_CP030324.1	Staphylococcus aureus strain AR_475 plasmid unnamed1, complete sequence
Staphylococcus aureus	GCF_003330905.1_ASM333090v1	NZ_CP030326.1	Staphylococcus aureus strain AR_474 chromosome, complete genome
Staphylococcus aureus	GCF_003330905.1_ASM333090v1	NZ_CP030325.1	Staphylococcus aureus strain AR_474 plasmid unnamed1, complete sequence
Staphylococcus aureus	GCF_003342735.1_ASM334273v1	NZ_CP031131.1	Staphylococcus aureus strain E16SA093 chromosome, complete genome
Staphylococcus aureus	GCF_003342775.1_ASM334277v1	NZ_CP031130.1	Staphylococcus aureus strain F17SA003 chromosome, complete genome
Staphylococcus aureus	GCF_003343155.1_ASM334315v1	NZ_CP017804.1	Staphylococcus aureus strain ch21 chromosome
Staphylococcus aureus	GCF_003343155.1_ASM334315v1	NZ_CP017805.1	Staphylococcus aureus strain ch21 plasmid pCH21_pAvX, complete sequence
Staphylococcus aureus	GCF_003343155.1_ASM334315v1	NZ_CP017806.1	Staphylococcus aureus strain ch21 plasmid pCH21_pAvY, complete sequence
Staphylococcus aureus	GCF_003347055.1_ASM334705v1	NZ_CP022607.1	Staphylococcus aureus strain FORC_061 chromosome, complete genome
Staphylococcus aureus	GCF_003347055.1_ASM334705v1	NZ_CP022608.1	Staphylococcus aureus strain FORC_061 plasmid pFORC61_2, complete sequence
Staphylococcus aureus	GCF_003350605.1_ASM335060v1	NZ_CP017807.1	Staphylococcus aureus strain ch22 chromosome
Staphylococcus aureus	GCF_003350605.1_ASM335060v1	NZ_CP017808.1	Staphylococcus aureus strain ch22 plasmid pCH22_pAvX, complete sequence
Staphylococcus aureus	GCF_003350605.1_ASM335060v1	NZ_CP017809.1	Staphylococcus aureus strain ch22 plasmid pCH22_pAvY, complete sequence
Staphylococcus aureus	GCF_003351925.1_ASM335192v1	NZ_CP022582.1	Staphylococcus aureus strain FORC_062 chromosome, complete genome
Staphylococcus aureus	GCF_003354545.1_ASM335454v1	NZ_CP022717.1	Staphylococcus aureus strain 27 chromosome, complete genome
Staphylococcus aureus	GCF_003354565.1_ASM335456v1	NZ_CP022903.1	Staphylococcus aureus strain 187 chromosome, complete genome
Staphylococcus aureus	GCF_003354585.1_ASM335458v1	NZ_CP022904.1	Staphylococcus aureus strain 629 chromosome, complete genome
Staphylococcus aureus	GCF_003354605.1_ASM335460v1	NZ_CP022898.1	Staphylococcus aureus strain 422 chromosome, complete genome
Staphylococcus aureus	GCF_003354625.1_ASM335462v1	NZ_CP022900.1	Staphylococcus aureus strain 468 chromosome, complete genome
Staphylococcus aureus	GCF_003354645.1_ASM335464v1	NZ_CP022897.1	Staphylococcus aureus strain 128 chromosome, complete genome
Staphylococcus aureus	GCF_003354665.1_ASM335466v1	NZ_CP022902.1	Staphylococcus aureus strain 165 chromosome, complete genome
Staphylococcus aureus	GCF_003354685.1_ASM335468v1	NZ_CP022896.1	Staphylococcus aureus strain 277 chromosome, complete genome
Staphylococcus aureus	GCF_003354705.1_ASM335470v1	NZ_CP022893.1	Staphylococcus aureus strain 61 chromosome, complete genome
Staphylococcus aureus	GCF_003354725.1_ASM335472v1	NZ_CP022899.1	Staphylococcus aureus strain 143 chromosome, complete genome
Staphylococcus aureus	GCF_003354745.1_ASM335474v1	NZ_CP022901.1	Staphylococcus aureus strain 466 chromosome, complete genome
Staphylococcus aureus	GCF_003354765.1_ASM335476v1	NZ_CP022894.1	Staphylococcus aureus strain 191 chromosome, complete genome
Staphylococcus aureus	GCF_003354785.1_ASM335478v1	NZ_CP022895.1	Staphylococcus aureus strain 85 chromosome, complete genome
Staphylococcus aureus	GCF_003354805.1_ASM335480v1	NZ_CP022892.1	Staphylococcus aureus strain 54 chromosome, complete genome
Staphylococcus aureus	GCF_003354865.1_ASM335486v1	NZ_CP022718.1	Staphylococcus aureus strain 45 chromosome, complete genome
Staphylococcus aureus	GCF_003354865.1_ASM335486v1	NZ_CP022719.1	Staphylococcus aureus strain 45 plasmid pPS00086.1A.1, complete sequence
Staphylococcus aureus	GCF_003354885.1_ASM335488v1	NZ_CP022910.1	Staphylococcus aureus strain 164 chromosome, complete genome
Staphylococcus aureus	GCF_003354885.1_ASM335488v1	NZ_CP022911.1	Staphylococcus aureus strain 164 plasmid pPS00089.1A.1, complete sequence
Staphylococcus aureus	GCF_003354905.1_ASM335490v1	NZ_CP022682.1	Staphylococcus aureus strain 78 chromosome, complete genome
Staphylococcus aureus	GCF_003354905.1_ASM335490v1	NZ_CP022683.1	Staphylococcus aureus strain 78 plasmid pPS00085.1A.1, complete sequence
Staphylococcus aureus	GCF_003354925.1_ASM335492v1	NZ_CP022720.1	Staphylococcus aureus strain 135 chromosome, complete genome
Staphylococcus aureus	GCF_003354925.1_ASM335492v1	NZ_CP022721.1	Staphylococcus aureus strain 135 plasmid pPS00087.1A.1, complete sequence
Staphylococcus aureus	GCF_003354945.1_ASM335494v1	NZ_CP022908.1	Staphylococcus aureus strain 545 chromosome, complete genome
Staphylococcus aureus	GCF_003354945.1_ASM335494v1	NZ_CP022909.1	Staphylococcus aureus strain 545 plasmid pPS00078.1A.1, complete sequence
Staphylococcus aureus	GCF_003354965.1_ASM335496v1	NZ_CP022906.1	Staphylococcus aureus strain 546 chromosome, complete genome
Staphylococcus aureus	GCF_003354965.1_ASM335496v1	NZ_CP022907.1	Staphylococcus aureus strain 546 plasmid pPS00077.1A.1, complete sequence
Staphylococcus aureus	GCF_003354985.1_ASM335498v1	NZ_CP022905.1	Staphylococcus aureus strain 628 chromosome, complete genome
Staphylococcus aureus	GCF_003394105.1_ASM339410v1	NZ_CP031537.1	Staphylococcus aureus strain WCH-SK2 chromosome, complete genome
Staphylococcus aureus	GCF_003425545.1_ASM342554v1	NZ_CP031667.1	Staphylococcus aureus strain 199 chromosome, complete genome
Staphylococcus aureus	GCF_003425545.1_ASM342554v1	NZ_CP031668.1	Staphylococcus aureus strain 199 plasmid pPS00120.1A.1, complete sequence
Staphylococcus aureus	GCF_003425545.1_ASM342554v1	NZ_CP031669.1	Staphylococcus aureus strain 199 plasmid pPS00120.1A.2, complete sequence
Staphylococcus aureus	GCF_003425835.1_ASM342583v1	NZ_CP031664.1	Staphylococcus aureus strain 28 chromosome, complete genome
Staphylococcus aureus	GCF_003425835.1_ASM342583v1	NZ_CP031665.1	Staphylococcus aureus strain 28 plasmid pPS00026.1A.1, complete sequence
Staphylococcus aureus	GCF_003425835.1_ASM342583v1	NZ_CP031666.1	Staphylococcus aureus strain 28 plasmid pPS00026.1A.2, complete sequence
Staphylococcus aureus	GCF_003425885.1_ASM342588v1	NZ_CP031661.1	Staphylococcus aureus strain 82 chromosome, complete genome
Staphylococcus aureus	GCF_003425885.1_ASM342588v1	NZ_CP031662.1	Staphylococcus aureus strain 82 plasmid pPS00051.1A.1, complete sequence
Staphylococcus aureus	GCF_003425885.1_ASM342588v1	NZ_CP031663.1	Staphylococcus aureus strain 82 plasmid pPS00051.1A.2, complete sequence
Staphylococcus aureus	GCF_003425915.1_ASM342591v1	NZ_CP031670.1	Staphylococcus aureus strain 64 chromosome, complete genome
Staphylococcus aureus	GCF_003425915.1_ASM342591v1	NZ_CP031671.1	Staphylococcus aureus strain 64 plasmid pPS00119.1A.1, complete sequence
Staphylococcus aureus	GCF_003425915.1_ASM342591v1	NZ_CP031672.1	Staphylococcus aureus strain 64 plasmid pPS00119.1A.2, complete sequence
Staphylococcus aureus	GCF_003426145.1_ASM342614v1	NZ_CP031673.1	Staphylococcus aureus strain MOZ66 chromosome, complete genome
Staphylococcus aureus	GCF_003431365.1_ASM343136v1	NZ_CP031779.1	Staphylococcus aureus strain CFBR-105 chromosome, complete genome
Staphylococcus aureus	GCF_003432345.1_ASM343234v1	NZ_CP031839.1	Staphylococcus aureus strain NX-T55 chromosome, complete genome
Staphylococcus aureus	GCF_003432345.1_ASM343234v1	NZ_CP031840.1	Staphylococcus aureus strain NX-T55 plasmid unnamed
Staphylococcus aureus	GCF_003432365.1_ASM343236v1	NZ_CP031838.1	Staphylococcus aureus strain QD-CD9 chromosome, complete genome
Staphylococcus aureus	GCF_003490125.1_ASM349012v1	NZ_CP032051.1	Staphylococcus aureus strain O17 chromosome, complete genome
Staphylococcus aureus	GCF_003573835.1_ASM357383v1	NZ_AP018923.1	Staphylococcus aureus strain JMUB3031 chromosome, complete genome
Staphylococcus aureus	GCF_003573835.1_ASM357383v1	NZ_AP018924.1	Staphylococcus aureus strain JMUB3031 plasmid pJMUB3031, complete sequence
Staphylococcus aureus	GCF_003573855.1_ASM357385v1	NZ_AP018922.1	Staphylococcus aureus strain JMUB1273 chromosome, complete genome
Staphylococcus aureus	GCF_003595365.1_ASM359536v1	NZ_CP014362.1	Staphylococcus aureus strain USA300-SUR1 chromosome, complete genome
Staphylococcus aureus	GCF_003595365.1_ASM359536v1	NZ_CP014363.1	Staphylococcus aureus strain USA300-SUR1 plasmid pUSA01-1-SUR1, complete sequence
Staphylococcus aureus	GCF_003595365.1_ASM359536v1	NZ_CP014364.1	Staphylococcus aureus strain USA300-SUR1 plasmid pUSA04-1-SUR1, complete sequence
Staphylococcus aureus	GCF_003595385.1_ASM359538v1	NZ_CP014365.1	Staphylococcus aureus strain USA300-SUR2 chromosome, complete genome
Staphylococcus aureus	GCF_003595385.1_ASM359538v1	NZ_CP014366.1	Staphylococcus aureus strain USA300-SUR2 plasmid pUSA01-1-SUR2, complete sequence
Staphylococcus aureus	GCF_003595385.1_ASM359538v1	NZ_CP014367.1	Staphylococcus aureus strain USA300-SUR2 plasmid pUSA04-1-SUR2, complete sequence
Staphylococcus aureus	GCF_003595405.1_ASM359540v1	NZ_CP014368.1	Staphylococcus aureus strain USA300-SUR3 chromosome, complete genome
Staphylococcus aureus	GCF_003595405.1_ASM359540v1	NZ_CP014369.1	Staphylococcus aureus strain USA300-SUR3 plasmid pUSA01-1-SUR3, complete sequence
Staphylococcus aureus	GCF_003595405.1_ASM359540v1	NZ_CP014370.1	Staphylococcus aureus strain USA300-SUR3 plasmid pUSA04-1-SUR3, complete sequence
Staphylococcus aureus	GCF_003595425.1_ASM359542v1	NZ_CP014371.1	Staphylococcus aureus strain USA300-SUR4 chromosome, complete genome
Staphylococcus aureus	GCF_003595425.1_ASM359542v1	NZ_CP014372.1	Staphylococcus aureus strain USA300-SUR4 plasmid pUSA01-1-SUR4, complete sequence
Staphylococcus aureus	GCF_003595425.1_ASM359542v1	NZ_CP014373.1	Staphylococcus aureus strain USA300-SUR4 plasmid pUSA04-2-SUR4, complete sequence
Staphylococcus aureus	GCF_003595425.1_ASM359542v1	NZ_CP014374.1	Staphylococcus aureus strain USA300-SUR4 plasmid pUSA05-1-SUR4, complete sequence
Staphylococcus aureus	GCF_003595425.1_ASM359542v1	NZ_CP014375.1	Staphylococcus aureus strain USA300-SUR4 plasmid pUSA06-1-SUR4, complete sequence
Staphylococcus aureus	GCF_003595445.1_ASM359544v1	NZ_CP014376.1	Staphylococcus aureus strain USA300-SUR5 chromosome, complete genome
Staphylococcus aureus	GCF_003595445.1_ASM359544v1	NZ_CP014377.1	Staphylococcus aureus strain USA300-SUR5 plasmid pUSA01-1-SUR5, complete sequence
Staphylococcus aureus	GCF_003595445.1_ASM359544v1	NZ_CP014378.1	Staphylococcus aureus strain USA300-SUR5 plasmid pUSA04-2-SUR5, complete sequence
Staphylococcus aureus	GCF_003595445.1_ASM359544v1	NZ_CP014379.1	Staphylococcus aureus strain USA300-SUR5 plasmid pUSA05-1-SUR5, complete sequence
Staphylococcus aureus	GCF_003595445.1_ASM359544v1	NZ_CP014380.1	Staphylococcus aureus strain USA300-SUR5 plasmid pUSA06-1-SUR5, complete sequence
Staphylococcus aureus	GCF_003595465.1_ASM359546v1	NZ_CP014381.1	Staphylococcus aureus strain USA300-SUR6 chromosome, complete genome
Staphylococcus aureus	GCF_003595465.1_ASM359546v1	NZ_CP014382.1	Staphylococcus aureus strain USA300-SUR6 plasmid pUSA01-1-SUR6, complete sequence
Staphylococcus aureus	GCF_003595465.1_ASM359546v1	NZ_CP014383.1	Staphylococcus aureus strain USA300-SUR6 plasmid pUSA04-1-SUR6, complete sequence
Staphylococcus aureus	GCF_003595485.1_ASM359548v1	NZ_CP014384.1	Staphylococcus aureus strain USA300-SUR7 chromosome, complete genome
Staphylococcus aureus	GCF_003595485.1_ASM359548v1	NZ_CP014385.1	Staphylococcus aureus strain USA300-SUR7 plasmid pUSA01-1-SUR7, complete sequence
Staphylococcus aureus	GCF_003595485.1_ASM359548v1	NZ_CP014386.1	Staphylococcus aureus strain USA300-SUR7 plasmid pUSA04-3-SUR7, complete sequence
Staphylococcus aureus	GCF_003595505.1_ASM359550v1	NZ_CP014387.1	Staphylococcus aureus strain USA300-SUR8 chromosome, complete genome
Staphylococcus aureus	GCF_003595505.1_ASM359550v1	NZ_CP014388.1	Staphylococcus aureus strain USA300-SUR8 plasmid pUSA01-1-SUR8, complete sequence
Staphylococcus aureus	GCF_003595505.1_ASM359550v1	NZ_CP014389.1	Staphylococcus aureus strain USA300-SUR8 plasmid pUSA04-2-SUR8, complete sequence
Staphylococcus aureus	GCF_003595505.1_ASM359550v1	NZ_CP014390.1	Staphylococcus aureus strain USA300-SUR8 plasmid pUSA05-1-SUR8, complete sequence
Staphylococcus aureus	GCF_003595505.1_ASM359550v1	NZ_CP014391.1	Staphylococcus aureus strain USA300-SUR8 plasmid pUSA06-1-SUR8, complete sequence
Staphylococcus aureus	GCF_003609855.1_ASM360985v1	NZ_AP017922.1	Staphylococcus aureus strain JP02758 chromosome, complete genome
Staphylococcus aureus	GCF_003609855.1_ASM360985v1	NZ_AP017923.1	Staphylococcus aureus strain JP02758 plasmid pJP080, complete sequence
Staphylococcus aureus	GCF_003609895.1_ASM360989v1	NZ_AP017891.1	Staphylococcus aureus strain GN3 chromosome, complete genome
Staphylococcus aureus	GCF_003609915.1_ASM360991v1	NZ_AP018349.1	Staphylococcus aureus strain GN1 chromosome, complete genome
Staphylococcus aureus	GCF_003627835.1_ASM362783v1	NZ_CP032481.1	Staphylococcus aureus strain O326 chromosome, complete genome
Staphylococcus aureus	GCF_003798185.1_ASM379818v1	NZ_CP033681.1	Staphylococcus aureus strain MSSA54 chromosome
Staphylococcus aureus	GCF_003827915.1_ASM382791v1	NZ_CP033865.1	Staphylococcus aureus strain FDAARGOS_504 chromosome, complete genome
Staphylococcus aureus	GCF_003855575.1_ASM385557v1	NZ_CP034098.1	Staphylococcus aureus strain 80wphwpl_v1 chromosome, complete genome
Staphylococcus aureus	GCF_003944865.1_ASM394486v1	NZ_CP034349.1	Staphylococcus aureus strain 80wphwpl chromosome, complete genome
Staphylococcus aureus	GCF_003945405.1_ASM394540v1	NZ_AP019305.1	Staphylococcus aureus strain TUM9458 chromosome, complete genome
Staphylococcus aureus	GCF_003945425.1_ASM394542v1	NZ_AP019306.1	Staphylococcus aureus strain TUM9463 chromosome, complete genome
Staphylococcus aureus	GCF_003952625.1_ASM395262v1	NZ_CP034441.1	Staphylococcus aureus strain PMB 81-4 chromosome, complete genome
Staphylococcus aureus	GCF_003955945.1_ASM395594v1	NZ_CP034102.1	Staphylococcus aureus strain O267 chromosome, complete genome
Staphylococcus aureus	GCF_003957315.1_ASM395731v1	NZ_CP034486.1	Staphylococcus aureus strain PMB 64-1 chromosome, complete genome
Staphylococcus aureus	GCF_003991015.1_ASM399101v1	NZ_CP029474.1	Staphylococcus aureus strain USA 100 isolate 30-47 chromosome, complete genome
Staphylococcus aureus	GCF_003991015.1_ASM399101v1	NZ_CP029475.1	Staphylococcus aureus strain USA 100 isolate 30-47 plasmid unnamed, complete sequence
Staphylococcus aureus	GCF_004001345.1_ASM400134v1	NZ_AP018376.1	Staphylococcus aureus strain SA003 chromosome
Staphylococcus aureus	GCF_004026165.1_ASM402616v1	NZ_CP035005.1	Staphylococcus aureus strain PCFH-226 chromosome, complete genome
Staphylococcus aureus	GCF_004026165.1_ASM402616v1	NZ_CP035006.1	Staphylococcus aureus strain PCFH-226 plasmid pP541, complete sequence
Staphylococcus aureus	GCF_004026185.1_ASM402618v1	NZ_CP035003.1	Staphylococcus aureus strain PCFA-221 chromosome, complete genome
Staphylococcus aureus	GCF_004026185.1_ASM402618v1	NZ_CP035004.1	Staphylococcus aureus strain PCFA-221 plasmid pP541, complete sequence
Staphylococcus aureus	GCF_004118995.1_ASM411899v1	NZ_CP035369.1	Staphylococcus aureus strain LAC chromosome, complete genome
Staphylococcus aureus	GCF_004118995.1_ASM411899v1	NZ_CP035370.1	Staphylococcus aureus strain LAC plasmid unnamed, complete sequence
Staphylococcus aureus	GCF_004119935.1_ASM411993v1	NZ_CP035415.1	Staphylococcus aureus strain NF25 chromosome, complete genome
Staphylococcus aureus	GCF_004119935.1_ASM411993v1	NZ_CP035416.1	Staphylococcus aureus strain NF25 plasmid pNF25
Staphylococcus aureus	GCF_004136235.1_ASM413623v1	NZ_CP030137.1	Staphylococcus aureus strain M51 chromosome, complete genome
Staphylococcus aureus	GCF_004136255.1_ASM413625v1	NZ_CP030138.1	Staphylococcus aureus strain M48 chromosome, complete genome
Staphylococcus aureus	GCF_004136655.1_ASM413665v1	NZ_CP030136.1	Staphylococcus aureus strain S57 chromosome, complete genome
Staphylococcus aureus	GCF_004153365.1_ASM415336v1	NZ_CP035671.1	Staphylococcus aureus strain VB31683 chromosome, complete genome
Staphylococcus aureus	GCF_004193875.1_ASM419387v1	NZ_CP020957.1	Staphylococcus aureus strain C3948 chromosome, complete genome
Staphylococcus aureus	GCF_004193895.1_ASM419389v1	NZ_CP020959.1	Staphylococcus aureus strain H489 chromosome, complete genome
Staphylococcus aureus	GCF_004208595.1_ASM420859v1	NZ_CP035791.1	Staphylococcus aureus strain 592 chromosome, complete genome
Staphylococcus aureus	GCF_004208595.1_ASM420859v1	NZ_CP035792.1	Staphylococcus aureus strain 592 plasmid unnamed, complete sequence
Staphylococcus aureus	GCF_004421085.1_ASM442108v1	NZ_CP038021.1	Staphylococcus aureus strain 04-002 chromosome, complete genome
Staphylococcus aureus	GCF_004614295.1_ASM461429v1	NZ_CP020956.1	Staphylococcus aureus strain C8879 chromosome, complete genome
Staphylococcus aureus	GCF_004614315.1_ASM461431v1	NZ_CP020960.1	Staphylococcus aureus strain JK3137 chromosome, complete genome
Staphylococcus aureus	GCF_004771335.1_ASM477133v1	NZ_CP038461.1	Staphylococcus aureus strain O217 chromosome, complete genome
Staphylococcus aureus	GCF_004771515.1_ASM477151v1	NZ_CP038460.1	Staphylococcus aureus strain B119 chromosome, complete genome
Staphylococcus aureus	GCF_004771975.1_ASM477197v1	NZ_CP038270.1	Staphylococcus aureus strain O408 isolate B115 chromosome, complete genome
Staphylococcus aureus	GCF_004772055.1_ASM477205v1	NZ_CP038269.1	Staphylococcus aureus strain O331 isolate B114 chromosome, complete genome
Staphylococcus aureus	GCF_004772175.1_ASM477217v1	NZ_CP038268.1	Staphylococcus aureus strain O55 isolate B118 chromosome, complete genome
Staphylococcus aureus	GCF_004772215.1_ASM477221v1	NZ_CP038612.1	Staphylococcus aureus strain O268 chromosome, complete genome
Staphylococcus aureus	GCF_004785995.1_ASM478599v1	NZ_CP039156.1	Staphylococcus aureus strain WCUH29 chromosome, complete genome
Staphylococcus aureus	GCF_004797195.1_ASM479719v1	NZ_CP038819.1	Staphylococcus aureus strain O82 chromosome, complete genome
Staphylococcus aureus	GCF_005153305.1_ASM515330v1	NZ_CP039848.1	Staphylococcus aureus strain 2030RH1 chromosome
Staphylococcus aureus	GCF_005153985.1_ASM515398v1	NZ_CP039759.1	Staphylococcus aureus strain NRRL B-41012 chromosome
Staphylococcus aureus	GCF_005153985.1_ASM515398v1	NZ_CP039760.1	Staphylococcus aureus strain NRRL B-41012 plasmid unnamed
Staphylococcus aureus	GCF_005705815.1_ASM570581v1	NZ_CP039160.1	Staphylococcus aureus strain Lr6 chromosome, complete genome
Staphylococcus aureus	GCF_005705815.1_ASM570581v1	NZ_CP039161.1	Staphylococcus aureus strain Lr6 plasmid pLr6, complete sequence
Staphylococcus aureus	GCF_005707015.1_ASM570701v1	NZ_CP039167.1	Staphylococcus aureus strain R50 chromosome, complete genome
Staphylococcus aureus	GCF_005707015.1_ASM570701v1	NZ_CP039168.1	Staphylococcus aureus strain R50 plasmid pR50, complete sequence
Staphylococcus aureus	GCF_005707215.1_ASM570721v1	NZ_CP039162.1	Staphylococcus aureus strain Lr12 chromosome, complete genome
Staphylococcus aureus	GCF_005707215.1_ASM570721v1	NZ_CP039163.1	Staphylococcus aureus strain Lr12 plasmid pLr12, complete sequence
Staphylococcus aureus	GCF_005707335.1_ASM570733v1	NZ_CP039992.1	Staphylococcus aureus strain Lr3 chromosome, complete genome
Staphylococcus aureus	GCF_005885975.1_ASM588597v1	NZ_CP040560.1	Staphylococcus aureus strain Col52-A5 chromosome, complete genome
Staphylococcus aureus	GCF_005885975.1_ASM588597v1	NZ_CP040561.1	Staphylococcus aureus strain Col52-A5 plasmid pCOL52-A5, complete sequence
Staphylococcus aureus	GCF_005889995.1_ASM588999v1	NZ_CP040619.1	Staphylococcus aureus strain J01 chromosome, complete genome
Staphylococcus aureus	GCF_005889995.1_ASM588999v1	NZ_CP040620.1	Staphylococcus aureus strain J01 plasmid pJ01-01, complete sequence
Staphylococcus aureus	GCF_005889995.1_ASM588999v1	NZ_CP040621.1	Staphylococcus aureus strain J01 plasmid pJ01-02, complete sequence
Staphylococcus aureus	GCF_005890015.1_ASM589001v1	NZ_CP040622.1	Staphylococcus aureus strain JKD6004 chromosome, complete genome
Staphylococcus aureus	GCF_005890035.1_ASM589003v1	NZ_CP040623.1	Staphylococcus aureus strain D592-HR chromosome, complete genome
Staphylococcus aureus	GCF_005890035.1_ASM589003v1	NZ_CP040624.1	Staphylococcus aureus strain D592-HR plasmid pSaD592-HR, complete sequence
Staphylococcus aureus	GCF_005931015.2_ASM593101v2	NZ_CP040229.2	Staphylococcus aureus strain GD487 chromosome, complete genome
Staphylococcus aureus	GCF_005931035.2_ASM593103v2	NZ_CP040230.2	Staphylococcus aureus strain GD1108 chromosome, complete genome
Staphylococcus aureus	GCF_005931055.2_ASM593105v2	NZ_CP040233.2	Staphylococcus aureus strain GD1696 chromosome, complete genome
Staphylococcus aureus	GCF_005954685.1_ASM595468v1	NZ_CP040665.1	Staphylococcus aureus strain D592 chromosome, complete genome
Staphylococcus aureus	GCF_005954685.1_ASM595468v1	NZ_CP040666.1	Staphylococcus aureus strain D592 plasmid pSaD592, complete sequence
Staphylococcus aureus	GCF_006088835.1_ASM608883v1	NZ_CP029198.1	Staphylococcus aureus strain aureus chromosome, complete genome
Staphylococcus aureus	GCF_006088835.1_ASM608883v1	NZ_CP029199.1	Staphylococcus aureus strain aureus plasmid pFORC_090.1, complete sequence
Staphylococcus aureus	GCF_006094915.1_ASM609491v1	NZ_CP035101.1	Staphylococcus aureus strain ATCC 12600 chromosome, complete genome
Staphylococcus aureus	GCF_006094915.1_ASM609491v1	NZ_CP035102.1	Staphylococcus aureus strain ATCC 12600 plasmid unnamed, complete sequence
Staphylococcus aureus	GCF_006158985.1_ASM615898v1	NZ_CP040801.1	Staphylococcus aureus strain S15 chromosome, complete genome
Staphylococcus aureus	GCF_006158985.1_ASM615898v1	NZ_CP040802.1	Staphylococcus aureus strain S15 plasmid unnamed1, complete sequence
Staphylococcus aureus	GCF_006364675.1_ASM636467v1	NZ_CP040998.1	Staphylococcus aureus strain FDAARGOS_773 chromosome, complete genome
Staphylococcus aureus	GCF_006364675.1_ASM636467v1	NZ_CP040999.1	Staphylococcus aureus strain FDAARGOS_773 plasmid unnamed1, complete sequence
Staphylococcus aureus	GCF_006364675.1_ASM636467v1	NZ_CP041000.1	Staphylococcus aureus strain FDAARGOS_773 plasmid unnamed2
Staphylococcus aureus	GCF_006364775.1_ASM636477v1	NZ_CP041010.1	Staphylococcus aureus strain FDAARGOS_766 chromosome, complete genome
Staphylococcus aureus	GCF_006364775.1_ASM636477v1	NZ_CP041009.1	Staphylococcus aureus strain FDAARGOS_766 plasmid unnamed1, complete sequence
Staphylococcus aureus	GCF_007185035.1_ASM718503v1	NZ_AP019751.1	Staphylococcus aureus strain JRA307 chromosome, complete genome
Staphylococcus aureus	GCF_007185035.1_ASM718503v1	NZ_AP019752.1	Staphylococcus aureus strain JRA307 plasmid pJRA307-1, complete sequence
Staphylococcus aureus	GCF_007410625.1_ASM741062v1	NZ_CP040625.1	Staphylococcus aureus strain JKD6004-DR chromosome, complete genome
Staphylococcus aureus	GCF_007726325.1_ASM772632v1	NZ_CP042003.1	Staphylococcus aureus strain B3-14B chromosome, complete genome
Staphylococcus aureus	GCF_007726325.1_ASM772632v1	NZ_CP042007.1	Staphylococcus aureus strain B3-14B plasmid pSALNT2.2, complete sequence
Staphylococcus aureus	GCF_007726325.1_ASM772632v1	NZ_CP042006.1	Staphylococcus aureus strain B3-14B plasmid pSALNT4.9, complete sequence
Staphylococcus aureus	GCF_007726325.1_ASM772632v1	NZ_CP042005.1	Staphylococcus aureus strain B3-14B plasmid pSALNT16, complete sequence
Staphylococcus aureus	GCF_007726325.1_ASM772632v1	NZ_CP042004.1	Staphylococcus aureus strain B3-14B plasmid pSALNT46, complete sequence
Staphylococcus aureus	GCF_007726465.1_ASM772646v1	NZ_CP042046.1	Staphylococcus aureus strain B2-7A chromosome, complete genome
Staphylococcus aureus	GCF_007726465.1_ASM772646v1	NZ_CP042047.1	Staphylococcus aureus strain B2-7A plasmid pSALNBL75, complete sequence
Staphylococcus aureus	GCF_007726495.1_ASM772649v1	NZ_CP042043.1	Staphylococcus aureus strain B2-15A chromosome, complete genome
Staphylococcus aureus	GCF_007726495.1_ASM772649v1	NZ_CP042044.1	Staphylococcus aureus strain B2-15A plasmid pSALNCL1.4, complete sequence
Staphylococcus aureus	GCF_007726495.1_ASM772649v1	NZ_CP042045.1	Staphylococcus aureus strain B2-15A plasmid pSALNCL17, complete sequence
Staphylococcus aureus	GCF_007726525.1_ASM772652v1	NZ_CP042153.1	Staphylococcus aureus strain B4-59C chromosome, complete genome
Staphylococcus aureus	GCF_007726525.1_ASM772652v1	NZ_CP042156.1	Staphylococcus aureus strain B4-59C plasmid pSALNC1.4-2, complete sequence
Staphylococcus aureus	GCF_007726525.1_ASM772652v1	NZ_CP042155.1	Staphylococcus aureus strain B4-59C plasmid pSALNC2.8, complete sequence
Staphylococcus aureus	GCF_007726525.1_ASM772652v1	NZ_CP042154.1	Staphylococcus aureus strain B4-59C plasmid pSALNC14, complete sequence
Staphylococcus aureus	GCF_007726545.1_ASM772654v1	NZ_CP042107.1	Staphylococcus aureus strain B8-13D chromosome, complete genome
Staphylococcus aureus	GCF_007726545.1_ASM772654v1	NZ_CP042109.1	Staphylococcus aureus strain B8-13D plasmid pSALNCG1.5, complete sequence
Staphylococcus aureus	GCF_007726545.1_ASM772654v1	NZ_CP042108.1	Staphylococcus aureus strain B8-13D plasmid pSALNCG17, complete sequence
Staphylococcus aureus	GCF_007726565.1_ASM772656v1	NZ_CP042157.1	Staphylococcus aureus strain B3-17D chromosome, complete genome
Staphylococcus aureus	GCF_007726565.1_ASM772656v1	NZ_CP042160.1	Staphylococcus aureus strain B3-17D plasmid pSALNC1.4-1, complete sequence
Staphylococcus aureus	GCF_007726565.1_ASM772656v1	NZ_CP042159.1	Staphylococcus aureus strain B3-17D plasmid pSALNC1.6, complete sequence
Staphylococcus aureus	GCF_007726565.1_ASM772656v1	NZ_CP042158.1	Staphylococcus aureus strain B3-17D plasmid pSALNC17, complete sequence
Staphylococcus aureus	GCF_007813675.1_ASM781367v1	NZ_CP031265.1	Staphylococcus aureus strain 13 chromosome, complete genome
Staphylococcus aureus	GCF_007826355.1_ASM782635v1	NZ_CP041037.1	Staphylococcus aureus strain NP66 chromosome, complete genome
Staphylococcus aureus	GCF_007827105.1_ASM782710v1	NZ_CP042048.1	Staphylococcus aureus strain B1-4A chromosome, complete genome
Staphylococcus aureus	GCF_007827105.1_ASM782710v1	NZ_CP042049.1	Staphylococcus aureus strain B1-4A plasmid pSALNB2.8, complete sequence
Staphylococcus aureus	GCF_007827105.1_ASM782710v1	NZ_CP042050.1	Staphylococcus aureus strain B1-4A plasmid pSALNB22, complete sequence
Staphylococcus aureus	GCF_007827105.1_ASM782710v1	NZ_CP042051.1	Staphylococcus aureus strain B1-4A plasmid pSALNB86 map unlocalized
Staphylococcus aureus	GCF_007827105.1_ASM782710v1	NZ_CP042052.1	Staphylococcus aureus strain B1-4A plasmid pSALNB86 map unlocalized
Staphylococcus aureus	GCF_007827105.1_ASM782710v1	NZ_CP042053.1	Staphylococcus aureus strain B1-4A plasmid pSALNB86 map unlocalized
Staphylococcus aureus	GCF_007827105.1_ASM782710v1	NZ_CP042054.1	Staphylococcus aureus strain B1-4A plasmid pSALNB86 map unlocalized
Staphylococcus aureus	GCF_007827105.1_ASM782710v1	NZ_CP042055.1	Staphylococcus aureus strain B1-4A plasmid pSALNB86 map unlocalized
Staphylococcus aureus	GCF_007827105.1_ASM782710v1	NZ_CP042056.1	Staphylococcus aureus strain B1-4A plasmid pSALNB86 map unlocalized
Staphylococcus aureus	GCF_007827105.1_ASM782710v1	NZ_CP042057.1	Staphylococcus aureus strain B1-4A plasmid pSALNB86 map unlocalized
Staphylococcus aureus	GCF_007827105.1_ASM782710v1	NZ_CP042058.1	Staphylococcus aureus strain B1-4A plasmid pSALNB86 map unlocalized
Staphylococcus aureus	GCF_007827105.1_ASM782710v1	NZ_CP042059.1	Staphylococcus aureus strain B1-4A plasmid pSALNB86 map unlocalized
Staphylococcus aureus	GCF_007827105.1_ASM782710v1	NZ_CP042060.1	Staphylococcus aureus strain B1-4A plasmid pSALNB86 map unlocalized
Staphylococcus aureus	GCF_007827105.1_ASM782710v1	NZ_CP042061.1	Staphylococcus aureus strain B1-4A plasmid pSALNB86 map unlocalized
Staphylococcus aureus	GCF_007827105.1_ASM782710v1	NZ_CP042062.1	Staphylococcus aureus strain B1-4A plasmid pSALNB86 map unlocalized
Staphylococcus aureus	GCF_007827105.1_ASM782710v1	NZ_CP042063.1	Staphylococcus aureus strain B1-4A plasmid pSALNB86 map unlocalized
Staphylococcus aureus	GCF_007827105.1_ASM782710v1	NZ_CP042064.1	Staphylococcus aureus strain B1-4A plasmid pSALNB86 map unlocalized
Staphylococcus aureus	GCF_007827105.1_ASM782710v1	NZ_CP042065.1	Staphylococcus aureus strain B1-4A plasmid pSALNB86 map unlocalized
Staphylococcus aureus	GCF_007827105.1_ASM782710v1	NZ_CP042066.1	Staphylococcus aureus strain B1-4A plasmid pSALNB86 map unlocalized
Staphylococcus aureus	GCF_007827105.1_ASM782710v1	NZ_CP042067.1	Staphylococcus aureus strain B1-4A plasmid pSALNB86 map unlocalized
Staphylococcus aureus	GCF_007827105.1_ASM782710v1	NZ_CP042068.1	Staphylococcus aureus strain B1-4A plasmid pSALNB86 map unlocalized
Staphylococcus aureus	GCF_007827105.1_ASM782710v1	NZ_CP042069.1	Staphylococcus aureus strain B1-4A plasmid pSALNB86 map unlocalized
Staphylococcus aureus	GCF_007827105.1_ASM782710v1	NZ_CP042070.1	Staphylococcus aureus strain B1-4A plasmid pSALNB86 map unlocalized
Staphylococcus aureus	GCF_007827105.1_ASM782710v1	NZ_CP042071.1	Staphylococcus aureus strain B1-4A plasmid pSALNB86 map unlocalized
Staphylococcus aureus	GCF_007827105.1_ASM782710v1	NZ_CP042072.1	Staphylococcus aureus strain B1-4A plasmid pSALNB86 map unlocalized
Staphylococcus aureus	GCF_007827105.1_ASM782710v1	NZ_CP042073.1	Staphylococcus aureus strain B1-4A plasmid pSALNB86 map unlocalized
Staphylococcus aureus	GCF_007827105.1_ASM782710v1	NZ_CP042074.1	Staphylococcus aureus strain B1-4A plasmid pSALNB86 map unlocalized
Staphylococcus aureus	GCF_007827105.1_ASM782710v1	NZ_CP042075.1	Staphylococcus aureus strain B1-4A plasmid pSALNB86 map unlocalized
Staphylococcus aureus	GCF_007827105.1_ASM782710v1	NZ_CP042076.1	Staphylococcus aureus strain B1-4A plasmid pSALNB86 map unlocalized
Staphylococcus aureus	GCF_007827105.1_ASM782710v1	NZ_CP042077.1	Staphylococcus aureus strain B1-4A plasmid pSALNB86 map unlocalized
Staphylococcus aureus	GCF_007827105.1_ASM782710v1	NZ_CP042078.1	Staphylococcus aureus strain B1-4A plasmid pSALNB86 map unlocalized
Staphylococcus aureus	GCF_007827105.1_ASM782710v1	NZ_CP042079.1	Staphylococcus aureus strain B1-4A plasmid pSALNB86 map unlocalized
Staphylococcus aureus	GCF_007827105.1_ASM782710v1	NZ_CP042080.1	Staphylococcus aureus strain B1-4A plasmid pSALNB86 map unlocalized
Staphylococcus aureus	GCF_007827115.1_ASM782711v1	NZ_CP042081.1	Staphylococcus aureus strain B9-22D chromosome, complete genome
Staphylococcus aureus	GCF_007827115.1_ASM782711v1	NZ_CP042082.1	Staphylococcus aureus strain B9-22D plasmid pSALNP2.8, complete sequence
Staphylococcus aureus	GCF_007827115.1_ASM782711v1	NZ_CP042083.1	Staphylococcus aureus strain B9-22D plasmid pSALNP9, complete sequence
Staphylococcus aureus	GCF_007827115.1_ASM782711v1	NZ_CP042084.1	Staphylococcus aureus strain B9-22D plasmid pSALNP58 map unlocalized
Staphylococcus aureus	GCF_007827115.1_ASM782711v1	NZ_CP042085.1	Staphylococcus aureus strain B9-22D plasmid pSALNP58 map unlocalized
Staphylococcus aureus	GCF_007827115.1_ASM782711v1	NZ_CP042086.1	Staphylococcus aureus strain B9-22D plasmid pSALNP58 map unlocalized
Staphylococcus aureus	GCF_007827115.1_ASM782711v1	NZ_CP042087.1	Staphylococcus aureus strain B9-22D plasmid pSALNP58 map unlocalized
Staphylococcus aureus	GCF_007827115.1_ASM782711v1	NZ_CP042088.1	Staphylococcus aureus strain B9-22D plasmid pSALNP58 map unlocalized
Staphylococcus aureus	GCF_007827115.1_ASM782711v1	NZ_CP042089.1	Staphylococcus aureus strain B9-22D plasmid pSALNP58 map unlocalized
Staphylococcus aureus	GCF_007827115.1_ASM782711v1	NZ_CP042090.1	Staphylococcus aureus strain B9-22D plasmid pSALNP58 map unlocalized
Staphylococcus aureus	GCF_007827115.1_ASM782711v1	NZ_CP042091.1	Staphylococcus aureus strain B9-22D plasmid pSALNP58 map unlocalized
Staphylococcus aureus	GCF_007827115.1_ASM782711v1	NZ_CP042092.1	Staphylococcus aureus strain B9-22D plasmid pSALNP58 map unlocalized
Staphylococcus aureus	GCF_007827115.1_ASM782711v1	NZ_CP042093.1	Staphylococcus aureus strain B9-22D plasmid pSALNP58 map unlocalized
Staphylococcus aureus	GCF_007827115.1_ASM782711v1	NZ_CP042094.1	Staphylococcus aureus strain B9-22D plasmid pSALNP58 map unlocalized
Staphylococcus aureus	GCF_007827115.1_ASM782711v1	NZ_CP042095.1	Staphylococcus aureus strain B9-22D plasmid pSALNP58 map unlocalized
Staphylococcus aureus	GCF_007827115.1_ASM782711v1	NZ_CP042096.1	Staphylococcus aureus strain B9-22D plasmid pSALNP58 map unlocalized
Staphylococcus aureus	GCF_007827115.1_ASM782711v1	NZ_CP042097.1	Staphylococcus aureus strain B9-22D plasmid pSALNP58 map unlocalized
Staphylococcus aureus	GCF_007827115.1_ASM782711v1	NZ_CP042098.1	Staphylococcus aureus strain B9-22D plasmid pSALNP58 map unlocalized
Staphylococcus aureus	GCF_007827115.1_ASM782711v1	NZ_CP042099.1	Staphylococcus aureus strain B9-22D plasmid pSALNP58 map unlocalized
Staphylococcus aureus	GCF_007827115.1_ASM782711v1	NZ_CP042100.1	Staphylococcus aureus strain B9-22D plasmid pSALNP58 map unlocalized
Staphylococcus aureus	GCF_007827115.1_ASM782711v1	NZ_CP042101.1	Staphylococcus aureus strain B9-22D plasmid pSALNP58 map unlocalized
Staphylococcus aureus	GCF_007827115.1_ASM782711v1	NZ_CP042102.1	Staphylococcus aureus strain B9-22D plasmid pSALNP58 map unlocalized
Staphylococcus aureus	GCF_007827115.1_ASM782711v1	NZ_CP042103.1	Staphylococcus aureus strain B9-22D plasmid pSALNP58 map unlocalized
Staphylococcus aureus	GCF_007827115.1_ASM782711v1	NZ_CP042104.1	Staphylococcus aureus strain B9-22D plasmid pSALNP58 map unlocalized
Staphylococcus aureus	GCF_007827115.1_ASM782711v1	NZ_CP042105.1	Staphylococcus aureus strain B9-22D plasmid pSALNP58 map unlocalized
Staphylococcus aureus	GCF_007827115.1_ASM782711v1	NZ_CP042106.1	Staphylococcus aureus strain B9-22D plasmid pSALNP58 map unlocalized
Staphylococcus aureus	GCF_007827125.1_ASM782712v1	NZ_CP042008.1	Staphylococcus aureus strain B3-4A chromosome, complete genome
Staphylococcus aureus	GCF_007827125.1_ASM782712v1	NZ_CP042009.1	Staphylococcus aureus strain B3-4A plasmid pSALNBL2.8, complete sequence
Staphylococcus aureus	GCF_007827125.1_ASM782712v1	NZ_CP042010.1	Staphylococcus aureus strain B3-4A plasmid pSALNBL118 map unlocalized
Staphylococcus aureus	GCF_007827125.1_ASM782712v1	NZ_CP042011.1	Staphylococcus aureus strain B3-4A plasmid pSALNBL118 map unlocalized
Staphylococcus aureus	GCF_007827125.1_ASM782712v1	NZ_CP042012.1	Staphylococcus aureus strain B3-4A plasmid pSALNBL118 map unlocalized
Staphylococcus aureus	GCF_007827125.1_ASM782712v1	NZ_CP042013.1	Staphylococcus aureus strain B3-4A plasmid pSALNBL118 map unlocalized
Staphylococcus aureus	GCF_007827125.1_ASM782712v1	NZ_CP042014.1	Staphylococcus aureus strain B3-4A plasmid pSALNBL118 map unlocalized
Staphylococcus aureus	GCF_007827125.1_ASM782712v1	NZ_CP042015.1	Staphylococcus aureus strain B3-4A plasmid pSALNBL118 map unlocalized
Staphylococcus aureus	GCF_007827125.1_ASM782712v1	NZ_CP042016.1	Staphylococcus aureus strain B3-4A plasmid pSALNBL118 map unlocalized
Staphylococcus aureus	GCF_007827125.1_ASM782712v1	NZ_CP042017.1	Staphylococcus aureus strain B3-4A plasmid pSALNBL118 map unlocalized
Staphylococcus aureus	GCF_007827125.1_ASM782712v1	NZ_CP042018.1	Staphylococcus aureus strain B3-4A plasmid pSALNBL118 map unlocalized
Staphylococcus aureus	GCF_007827125.1_ASM782712v1	NZ_CP042019.1	Staphylococcus aureus strain B3-4A plasmid pSALNBL118 map unlocalized
Staphylococcus aureus	GCF_007827125.1_ASM782712v1	NZ_CP042020.1	Staphylococcus aureus strain B3-4A plasmid pSALNBL118 map unlocalized
Staphylococcus aureus	GCF_007827125.1_ASM782712v1	NZ_CP042021.1	Staphylococcus aureus strain B3-4A plasmid pSALNBL118 map unlocalized
Staphylococcus aureus	GCF_007827125.1_ASM782712v1	NZ_CP042022.1	Staphylococcus aureus strain B3-4A plasmid pSALNBL118 map unlocalized
Staphylococcus aureus	GCF_007827125.1_ASM782712v1	NZ_CP042023.1	Staphylococcus aureus strain B3-4A plasmid pSALNBL118 map unlocalized
Staphylococcus aureus	GCF_007827125.1_ASM782712v1	NZ_CP042024.1	Staphylococcus aureus strain B3-4A plasmid pSALNBL118 map unlocalized
Staphylococcus aureus	GCF_007827125.1_ASM782712v1	NZ_CP042025.1	Staphylococcus aureus strain B3-4A plasmid pSALNBL118 map unlocalized
Staphylococcus aureus	GCF_007827125.1_ASM782712v1	NZ_CP042026.1	Staphylococcus aureus strain B3-4A plasmid pSALNBL118 map unlocalized
Staphylococcus aureus	GCF_007827125.1_ASM782712v1	NZ_CP042027.1	Staphylococcus aureus strain B3-4A plasmid pSALNBL118 map unlocalized
Staphylococcus aureus	GCF_007827125.1_ASM782712v1	NZ_CP042028.1	Staphylococcus aureus strain B3-4A plasmid pSALNBL118 map unlocalized
Staphylococcus aureus	GCF_007827125.1_ASM782712v1	NZ_CP042029.1	Staphylococcus aureus strain B3-4A plasmid pSALNBL118 map unlocalized
Staphylococcus aureus	GCF_007827125.1_ASM782712v1	NZ_CP042030.1	Staphylococcus aureus strain B3-4A plasmid pSALNBL118 map unlocalized
Staphylococcus aureus	GCF_007827125.1_ASM782712v1	NZ_CP042031.1	Staphylococcus aureus strain B3-4A plasmid pSALNBL118 map unlocalized
Staphylococcus aureus	GCF_007827125.1_ASM782712v1	NZ_CP042032.1	Staphylococcus aureus strain B3-4A plasmid pSALNBL118 map unlocalized
Staphylococcus aureus	GCF_007827125.1_ASM782712v1	NZ_CP042033.1	Staphylococcus aureus strain B3-4A plasmid pSALNBL118 map unlocalized
Staphylococcus aureus	GCF_007827125.1_ASM782712v1	NZ_CP042034.1	Staphylococcus aureus strain B3-4A plasmid pSALNBL118 map unlocalized
Staphylococcus aureus	GCF_007827125.1_ASM782712v1	NZ_CP042035.1	Staphylococcus aureus strain B3-4A plasmid pSALNBL118 map unlocalized
Staphylococcus aureus	GCF_007827125.1_ASM782712v1	NZ_CP042036.1	Staphylococcus aureus strain B3-4A plasmid pSALNBL118 map unlocalized
Staphylococcus aureus	GCF_007827125.1_ASM782712v1	NZ_CP042037.1	Staphylococcus aureus strain B3-4A plasmid pSALNBL118 map unlocalized
Staphylococcus aureus	GCF_007827125.1_ASM782712v1	NZ_CP042038.1	Staphylococcus aureus strain B3-4A plasmid pSALNBL118 map unlocalized
Staphylococcus aureus	GCF_007827125.1_ASM782712v1	NZ_CP042039.1	Staphylococcus aureus strain B3-4A plasmid pSALNBL118 map unlocalized
Staphylococcus aureus	GCF_007827125.1_ASM782712v1	NZ_CP042040.1	Staphylococcus aureus strain B3-4A plasmid pSALNBL118 map unlocalized
Staphylococcus aureus	GCF_007827125.1_ASM782712v1	NZ_CP042041.1	Staphylococcus aureus strain B3-4A plasmid pSALNBL118 map unlocalized
Staphylococcus aureus	GCF_007827125.1_ASM782712v1	NZ_CP042042.1	Staphylococcus aureus strain B3-4A plasmid pSALNBL118 map unlocalized
Staphylococcus aureus	GCF_007954445.1_ASM795444v1	NZ_CP042346.1	Staphylococcus aureus strain BSN9S chromosome, complete genome
Staphylococcus aureus	GCF_007954445.1_ASM795444v1	NZ_CP042347.1	Staphylococcus aureus strain BSN9S plasmid pSaBSN9, complete sequence
Staphylococcus aureus	GCF_007954465.1_ASM795446v1	NZ_CP042348.1	Staphylococcus aureus strain BSN9R chromosome, complete genome
Staphylococcus aureus	GCF_007954465.1_ASM795446v1	NZ_CP042349.1	Staphylococcus aureus strain BSN9R plasmid pSaBSN9S, complete sequence
Staphylococcus aureus	GCF_007998145.1_ASM799814v1	NZ_CP042650.1	Staphylococcus aureus strain X22 chromosome, complete genome
Staphylococcus aureus	GCF_007998145.1_ASM799814v1	NZ_CP042651.1	Staphylococcus aureus strain X22 plasmid unnamed, complete sequence
Staphylococcus aureus	GCF_008244705.1_ASM824470v1	NZ_CP043386.1	Staphylococcus aureus strain NRS384 chromosome, complete genome
Staphylococcus aureus	GCF_008244705.1_ASM824470v1	NZ_CP043387.1	Staphylococcus aureus strain NRS384 plasmid pNRS384_1, complete sequence
Staphylococcus aureus	GCF_008244705.1_ASM824470v1	NZ_CP043388.1	Staphylococcus aureus strain NRS384 plasmid pNRS384_2, complete sequence
Staphylococcus aureus	GCF_008244725.1_ASM824472v1	NZ_CP043392.1	Staphylococcus aureus strain NRS384-rpoB-H481N-NCV chromosome, complete genome
Staphylococcus aureus	GCF_008244725.1_ASM824472v1	NZ_CP043393.1	Staphylococcus aureus strain NRS384-rpoB-H481N-NCV plasmid pNRS384_1, complete sequence
Staphylococcus aureus	GCF_008244725.1_ASM824472v1	NZ_CP043394.1	Staphylococcus aureus strain NRS384-rpoB-H481N-NCV plasmid pNRS384_2, complete sequence
Staphylococcus aureus	GCF_008244745.1_ASM824474v1	NZ_CP043389.1	Staphylococcus aureus strain NRS384-rpoB-H481N-SCV chromosome, complete genome
Staphylococcus aureus	GCF_008244745.1_ASM824474v1	NZ_CP043390.1	Staphylococcus aureus strain NRS384-rpoB-H481N-SCV plasmid pNRS384_1, complete sequence
Staphylococcus aureus	GCF_008244745.1_ASM824474v1	NZ_CP043391.1	Staphylococcus aureus strain NRS384-rpoB-H481N-SCV plasmid pNRS384_2, complete sequence
Staphylococcus aureus	GCF_008329865.1_ASM832986v1	NZ_CP031888.1	Staphylococcus aureus strain CFSAN082782 chromosome, complete genome
Staphylococcus aureus	GCF_008329865.1_ASM832986v1	NZ_CP031889.1	Staphylococcus aureus strain CFSAN082782 plasmid pMRSA_23, complete sequence
Staphylococcus aureus	GCF_008329885.1_ASM832988v1	NZ_CP031890.1	Staphylococcus aureus strain CFSAN082781 chromosome, complete genome
Staphylococcus aureus	GCF_008329885.1_ASM832988v1	NZ_CP031891.1	Staphylococcus aureus strain CFSAN082781 plasmid pMRSA_22, complete sequence
Staphylococcus aureus	GCF_008330045.1_ASM833004v1	NZ_CP039448.1	Staphylococcus aureus strain VGC1 chromosome, complete genome
Staphylococcus aureus	GCF_008330045.1_ASM833004v1	NZ_CP039449.1	Staphylococcus aureus strain VGC1 plasmid pVGC1_1, complete sequence
Staphylococcus aureus	GCF_008330045.1_ASM833004v1	NZ_CP039450.1	Staphylococcus aureus strain VGC1 plasmid pVGC1_2, complete sequence
Staphylococcus aureus	GCF_008330585.1_ASM833058v1	NZ_CP031886.1	Staphylococcus aureus strain CFSAN082783 chromosome, complete genome
Staphylococcus aureus	GCF_008330585.1_ASM833058v1	NZ_CP031887.1	Staphylococcus aureus strain CFSAN082783 plasmid pMRSA_24, complete sequence
Staphylococcus aureus	GCF_008370795.1_ASM837079v1	NZ_CP043300.1	Staphylococcus aureus strain 16439 chromosome
Staphylococcus aureus	GCF_008370795.1_ASM837079v1	NZ_CP043301.1	Staphylococcus aureus strain 16439 plasmid unnamed1, complete sequence
Staphylococcus aureus	GCF_008370815.1_ASM837081v1	NZ_CP043302.1	Staphylococcus aureus strain 16445 chromosome, complete genome
Staphylococcus aureus	GCF_008370815.1_ASM837081v1	NZ_CP043303.1	Staphylococcus aureus strain 16445 plasmid unnamed1, complete sequence
Staphylococcus aureus	GCF_008462245.1_ASM846224v1	NZ_CP040232.1	Staphylococcus aureus strain GD1706 chromosome, complete genome
Staphylococcus aureus	GCF_008619075.1_ASM861907v1	NZ_AP020324.1	Staphylococcus aureus strain KUN1163 chromosome, complete genome
Staphylococcus aureus	GCF_008619075.1_ASM861907v1	NZ_AP020325.1	Staphylococcus aureus strain KUN1163 plasmid p01KUN1163, complete sequence
Staphylococcus aureus	GCF_008619235.1_ASM861923v1	NZ_AP020311.1	Staphylococcus aureus strain KUH140013 chromosome, complete genome
Staphylococcus aureus	GCF_008619235.1_ASM861923v1	NZ_AP020312.1	Staphylococcus aureus strain KUH140013 plasmid p01KUH140013, complete sequence
Staphylococcus aureus	GCF_008619415.1_ASM861941v1	NZ_AP020313.1	Staphylococcus aureus strain KUH140046 chromosome, complete genome
Staphylococcus aureus	GCF_008619415.1_ASM861941v1	NZ_AP020314.1	Staphylococcus aureus strain KUH140046 plasmid p01KUH140046, complete sequence
Staphylococcus aureus	GCF_008619595.1_ASM861959v1	NZ_AP020315.1	Staphylococcus aureus strain KUH140087 chromosome, complete genome
Staphylococcus aureus	GCF_008619795.1_ASM861979v1	NZ_AP020316.1	Staphylococcus aureus strain KUH140331 chromosome, complete genome
Staphylococcus aureus	GCF_008619795.1_ASM861979v1	NZ_AP020317.1	Staphylococcus aureus strain KUH140331 plasmid p01KUH140331, complete sequence
Staphylococcus aureus	GCF_008619935.1_ASM861993v1	NZ_AP020318.1	Staphylococcus aureus strain KUH180038 chromosome, complete genome
Staphylococcus aureus	GCF_008619935.1_ASM861993v1	NZ_AP020319.1	Staphylococcus aureus strain KUH180038 plasmid p01KUH180038, complete sequence
Staphylococcus aureus	GCF_008620055.1_ASM862005v1	NZ_AP020320.1	Staphylococcus aureus strain KUH180062 chromosome, complete genome
Staphylococcus aureus	GCF_008620055.1_ASM862005v1	NZ_AP020321.1	Staphylococcus aureus strain KUH180062 plasmid p01KUH180062, complete sequence
Staphylococcus aureus	GCF_008620175.1_ASM862017v1	NZ_AP020322.1	Staphylococcus aureus strain KUH180129 chromosome, complete genome
Staphylococcus aureus	GCF_008620175.1_ASM862017v1	NZ_AP020323.1	Staphylococcus aureus strain KUH180129 plasmid p01KUH180129, complete sequence
Staphylococcus aureus	GCF_008630675.1_ASM863067v1	NZ_CP043911.1	Staphylococcus aureus strain GHA13 chromosome
Staphylococcus aureus	GCF_008630695.1_ASM863069v1	NZ_CP043912.1	Staphylococcus aureus strain GHA12 chromosome
Staphylococcus aureus	GCF_008630715.1_ASM863071v1	NZ_CP043913.1	Staphylococcus aureus strain GHA11 chromosome
Staphylococcus aureus	GCF_008630735.1_ASM863073v1	NZ_CP043915.1	Staphylococcus aureus strain GHA9 chromosome
Staphylococcus aureus	GCF_008630755.1_ASM863075v1	NZ_CP043918.1	Staphylococcus aureus strain GHA6 chromosome
Staphylococcus aureus	GCF_008630775.1_ASM863077v1	NZ_CP043919.1	Staphylococcus aureus strain GHA5 chromosome
Staphylococcus aureus	GCF_008630795.1_ASM863079v1	NZ_CP043920.1	Staphylococcus aureus strain GHA4 chromosome
Staphylococcus aureus	GCF_008630815.1_ASM863081v1	NZ_CP043917.1	Staphylococcus aureus strain GHA7 chromosome
Staphylococcus aureus	GCF_008630835.1_ASM863083v1	NZ_CP043921.1	Staphylococcus aureus strain GHA3 chromosome
Staphylococcus aureus	GCF_008630855.1_ASM863085v1	NZ_CP043922.1	Staphylococcus aureus strain GHA2 chromosome
Staphylococcus aureus	GCF_008630875.1_ASM863087v1	NZ_CP043923.1	Staphylococcus aureus strain GHA1 chromosome
Staphylococcus aureus	GCF_008693765.1_ASM869376v1	NZ_CP044106.1	Staphylococcus aureus strain FDAARGOS_660 chromosome, complete genome
Staphylococcus aureus	GCF_008693765.1_ASM869376v1	NZ_CP044105.1	Staphylococcus aureus strain FDAARGOS_660 plasmid unnamed1, complete sequence
Staphylococcus aureus	GCF_008694145.1_ASM869414v1	NZ_CP043916.1	Staphylococcus aureus strain GHA8 chromosome
Staphylococcus aureus	GCF_008694165.1_ASM869416v1	NZ_CP043914.1	Staphylococcus aureus strain GHA10 chromosome
Staphylococcus aureus	GCF_009176765.1_ASM917676v1	NZ_AP019542.1	Staphylococcus aureus strain KG-03 chromosome, complete genome
Staphylococcus aureus	GCF_009176785.1_ASM917678v1	NZ_AP019543.1	Staphylococcus aureus strain KG-18 chromosome, complete genome
Staphylococcus aureus	GCF_009176785.1_ASM917678v1	NZ_AP019544.1	Staphylococcus aureus strain KG-18 plasmid pKG-18, complete sequence
Staphylococcus aureus	GCF_009176875.1_ASM917687v1	NZ_AP019545.1	Staphylococcus aureus strain KG-22 chromosome, complete genome
Staphylococcus aureus	GCF_009176875.1_ASM917687v1	NZ_AP019546.1	Staphylococcus aureus strain KG-22 plasmid pKG-22, complete sequence
Staphylococcus aureus	GCF_009259725.1_ASM925972v1	NZ_CP042110.1	Staphylococcus aureus strain B6-55A chromosome, complete genome
Staphylococcus aureus	GCF_009259725.1_ASM925972v1	NZ_CP042111.1	Staphylococcus aureus strain B6-55A plasmid pSALNT20, complete sequence
Staphylococcus aureus	GCF_009259725.1_ASM925972v1	NZ_CP042112.1	Staphylococcus aureus strain B6-55A plasmid pSALNT106 map unlocalized
Staphylococcus aureus	GCF_009259725.1_ASM925972v1	NZ_CP042113.1	Staphylococcus aureus strain B6-55A plasmid pSALNT106 map unlocalized
Staphylococcus aureus	GCF_009259725.1_ASM925972v1	NZ_CP042114.1	Staphylococcus aureus strain B6-55A plasmid pSALNT106 map unlocalized
Staphylococcus aureus	GCF_009259725.1_ASM925972v1	NZ_CP042115.1	Staphylococcus aureus strain B6-55A plasmid pSALNT106 map unlocalized
Staphylococcus aureus	GCF_009259725.1_ASM925972v1	NZ_CP042116.1	Staphylococcus aureus strain B6-55A plasmid pSALNT106 map unlocalized
Staphylococcus aureus	GCF_009259725.1_ASM925972v1	NZ_CP042117.1	Staphylococcus aureus strain B6-55A plasmid pSALNT106 map unlocalized
Staphylococcus aureus	GCF_009259725.1_ASM925972v1	NZ_CP042118.1	Staphylococcus aureus strain B6-55A plasmid pSALNT106 map unlocalized
Staphylococcus aureus	GCF_009259725.1_ASM925972v1	NZ_CP042119.1	Staphylococcus aureus strain B6-55A plasmid pSALNT106 map unlocalized
Staphylococcus aureus	GCF_009259725.1_ASM925972v1	NZ_CP042120.1	Staphylococcus aureus strain B6-55A plasmid pSALNT106 map unlocalized
Staphylococcus aureus	GCF_009259725.1_ASM925972v1	NZ_CP042121.1	Staphylococcus aureus strain B6-55A plasmid pSALNT106 map unlocalized
Staphylococcus aureus	GCF_009259725.1_ASM925972v1	NZ_CP042122.1	Staphylococcus aureus strain B6-55A plasmid pSALNT106 map unlocalized
Staphylococcus aureus	GCF_009259725.1_ASM925972v1	NZ_CP042123.1	Staphylococcus aureus strain B6-55A plasmid pSALNT106 map unlocalized
Staphylococcus aureus	GCF_009259725.1_ASM925972v1	NZ_CP042124.1	Staphylococcus aureus strain B6-55A plasmid pSALNT106 map unlocalized
Staphylococcus aureus	GCF_009259725.1_ASM925972v1	NZ_CP042125.1	Staphylococcus aureus strain B6-55A plasmid pSALNT106 map unlocalized
Staphylococcus aureus	GCF_009259725.1_ASM925972v1	NZ_CP042126.1	Staphylococcus aureus strain B6-55A plasmid pSALNT106 map unlocalized
Staphylococcus aureus	GCF_009259725.1_ASM925972v1	NZ_CP042127.1	Staphylococcus aureus strain B6-55A plasmid pSALNT106 map unlocalized
Staphylococcus aureus	GCF_009259725.1_ASM925972v1	NZ_CP042128.1	Staphylococcus aureus strain B6-55A plasmid pSALNT106 map unlocalized
Staphylococcus aureus	GCF_009259725.1_ASM925972v1	NZ_CP042129.1	Staphylococcus aureus strain B6-55A plasmid pSALNT106 map unlocalized
Staphylococcus aureus	GCF_009259725.1_ASM925972v1	NZ_CP042130.1	Staphylococcus aureus strain B6-55A plasmid pSALNT106 map unlocalized
Staphylococcus aureus	GCF_009259725.1_ASM925972v1	NZ_CP042131.1	Staphylococcus aureus strain B6-55A plasmid pSALNT106 map unlocalized
Staphylococcus aureus	GCF_009259725.1_ASM925972v1	NZ_CP042132.1	Staphylococcus aureus strain B6-55A plasmid pSALNT106 map unlocalized
Staphylococcus aureus	GCF_009259725.1_ASM925972v1	NZ_CP042133.1	Staphylococcus aureus strain B6-55A plasmid pSALNT106 map unlocalized
Staphylococcus aureus	GCF_009259725.1_ASM925972v1	NZ_CP042134.1	Staphylococcus aureus strain B6-55A plasmid pSALNT106 map unlocalized
Staphylococcus aureus	GCF_009259725.1_ASM925972v1	NZ_CP042135.1	Staphylococcus aureus strain B6-55A plasmid pSALNT106 map unlocalized
Staphylococcus aureus	GCF_009259725.1_ASM925972v1	NZ_CP042136.1	Staphylococcus aureus strain B6-55A plasmid pSALNT106 map unlocalized
Staphylococcus aureus	GCF_009259725.1_ASM925972v1	NZ_CP042137.1	Staphylococcus aureus strain B6-55A plasmid pSALNT106 map unlocalized
Staphylococcus aureus	GCF_009259725.1_ASM925972v1	NZ_CP042138.1	Staphylococcus aureus strain B6-55A plasmid pSALNT106 map unlocalized
Staphylococcus aureus	GCF_009259725.1_ASM925972v1	NZ_CP042139.1	Staphylococcus aureus strain B6-55A plasmid pSALNT106 map unlocalized
Staphylococcus aureus	GCF_009259725.1_ASM925972v1	NZ_CP042140.1	Staphylococcus aureus strain B6-55A plasmid pSALNT106 map unlocalized
Staphylococcus aureus	GCF_009259725.1_ASM925972v1	NZ_CP042141.1	Staphylococcus aureus strain B6-55A plasmid pSALNT106 map unlocalized
Staphylococcus aureus	GCF_009259725.1_ASM925972v1	NZ_CP042142.1	Staphylococcus aureus strain B6-55A plasmid pSALNT106 map unlocalized
Staphylococcus aureus	GCF_009259725.1_ASM925972v1	NZ_CP042143.1	Staphylococcus aureus strain B6-55A plasmid pSALNT106 map unlocalized
Staphylococcus aureus	GCF_009259725.1_ASM925972v1	NZ_CP042144.1	Staphylococcus aureus strain B6-55A plasmid pSALNT106 map unlocalized
Staphylococcus aureus	GCF_009259725.1_ASM925972v1	NZ_CP042145.1	Staphylococcus aureus strain B6-55A plasmid pSALNT106 map unlocalized
Staphylococcus aureus	GCF_009259725.1_ASM925972v1	NZ_CP042146.1	Staphylococcus aureus strain B6-55A plasmid pSALNT106 map unlocalized
Staphylococcus aureus	GCF_009259725.1_ASM925972v1	NZ_CP042147.1	Staphylococcus aureus strain B6-55A plasmid pSALNT106 map unlocalized
Staphylococcus aureus	GCF_009259725.1_ASM925972v1	NZ_CP042148.1	Staphylococcus aureus strain B6-55A plasmid pSALNT106 map unlocalized
Staphylococcus aureus	GCF_009259725.1_ASM925972v1	NZ_CP042149.1	Staphylococcus aureus strain B6-55A plasmid pSALNT106 map unlocalized
Staphylococcus aureus	GCF_009259725.1_ASM925972v1	NZ_CP042150.1	Staphylococcus aureus strain B6-55A plasmid pSALNT106 map unlocalized
Staphylococcus aureus	GCF_009259725.1_ASM925972v1	NZ_CP042151.1	Staphylococcus aureus strain B6-55A plasmid pSALNT106 map unlocalized
Staphylococcus aureus	GCF_009259725.1_ASM925972v1	NZ_CP042152.1	Staphylococcus aureus strain B6-55A plasmid pSALNT106 map unlocalized
Staphylococcus aureus	GCF_009497915.1_ASM949791v1	NZ_CP033117.1	Staphylococcus aureus strain Zhenghai chromosome
Staphylococcus aureus	GCF_009497955.1_ASM949795v1	NZ_CP033390.1	Staphylococcus aureus strain SCDR-SA1 chromosome
Staphylococcus aureus	GCF_009650155.1_ASM965015v1	NZ_CP045866.1	Staphylococcus aureus strain CFSAN007894 chromosome, complete genome
Staphylococcus aureus	GCF_009650155.1_ASM965015v1	NZ_CP045867.1	Staphylococcus aureus strain CFSAN007894 plasmid pCFSAN007894, complete sequence
Staphylococcus aureus	GCF_009684655.1_ASM968465v1	NZ_CP045472.1	Staphylococcus aureus strain ZY05 chromosome, complete genome
Staphylococcus aureus	GCF_009684655.1_ASM968465v1	NZ_CP045473.1	Staphylococcus aureus strain ZY05 plasmid pZY05, complete sequence
Staphylococcus aureus	GCF_009728755.1_ASM972875v1	NZ_CP033112.1	Staphylococcus aureus strain ST20130944 chromosome, complete genome
Staphylococcus aureus	GCF_009728755.1_ASM972875v1	NZ_CP033113.1	Staphylococcus aureus strain ST20130944 plasmid pST20130944, complete sequence
Staphylococcus aureus	GCF_009728775.1_ASM972877v1	NZ_CP033114.1	Staphylococcus aureus strain ST20130945 chromosome, complete genome
Staphylococcus aureus	GCF_009728775.1_ASM972877v1	NZ_CP033115.1	Staphylococcus aureus strain ST20130945 plasmid pST20130945, complete sequence
Staphylococcus aureus	GCF_009731595.1_ASM973159v1	NZ_AP019712.1	Staphylococcus aureus strain Tokyo12480 chromosome, complete genome
Staphylococcus aureus	GCF_009739675.1_ASM973967v1	NZ_CP033982.1	Staphylococcus aureus strain P2D8C1 chromosome, complete genome
Staphylococcus aureus	GCF_009739675.1_ASM973967v1	NZ_CP033978.1	Staphylococcus aureus strain P2D8C1 plasmid unnamed1, complete sequence
Staphylococcus aureus	GCF_009739675.1_ASM973967v1	NZ_CP033979.1	Staphylococcus aureus strain P2D8C1 plasmid unnamed2, complete sequence
Staphylococcus aureus	GCF_009739675.1_ASM973967v1	NZ_CP033980.1	Staphylococcus aureus strain P2D8C1 plasmid unnamed3, complete sequence
Staphylococcus aureus	GCF_009739675.1_ASM973967v1	NZ_CP033981.1	Staphylococcus aureus strain P2D8C1 plasmid unnamed4, complete sequence
Staphylococcus aureus	GCF_009739695.1_ASM973969v1	NZ_CP033987.1	Staphylococcus aureus strain P2D1C1 chromosome, complete genome
Staphylococcus aureus	GCF_009739695.1_ASM973969v1	NZ_CP033983.1	Staphylococcus aureus strain P2D1C1 plasmid unnamed1, complete sequence
Staphylococcus aureus	GCF_009739695.1_ASM973969v1	NZ_CP033984.1	Staphylococcus aureus strain P2D1C1 plasmid unnamed2, complete sequence
Staphylococcus aureus	GCF_009739695.1_ASM973969v1	NZ_CP033985.1	Staphylococcus aureus strain P2D1C1 plasmid unnamed3, complete sequence
Staphylococcus aureus	GCF_009739695.1_ASM973969v1	NZ_CP033986.1	Staphylococcus aureus strain P2D1C1 plasmid unnamed4, complete sequence
Staphylococcus aureus	GCF_009739715.1_ASM973971v1	NZ_CP033977.1	Staphylococcus aureus strain P2D15C1 chromosome, complete genome
Staphylococcus aureus	GCF_009739715.1_ASM973971v1	NZ_CP033973.1	Staphylococcus aureus strain P2D15C1 plasmid unnamed1, complete sequence
Staphylococcus aureus	GCF_009739715.1_ASM973971v1	NZ_CP033974.1	Staphylococcus aureus strain P2D15C1 plasmid unnamed2, complete sequence
Staphylococcus aureus	GCF_009739715.1_ASM973971v1	NZ_CP033975.1	Staphylococcus aureus strain P2D15C1 plasmid unnamed3, complete sequence
Staphylococcus aureus	GCF_009739715.1_ASM973971v1	NZ_CP033976.1	Staphylococcus aureus strain P2D15C1 plasmid unnamed4, complete sequence
Staphylococcus aureus	GCF_009739735.1_ASM973973v1	NZ_CP033996.1	Staphylococcus aureus strain P1D9C1 chromosome, complete genome
Staphylococcus aureus	GCF_009739735.1_ASM973973v1	NZ_CP033994.1	Staphylococcus aureus strain P1D9C1 plasmid unnamed1, complete sequence
Staphylococcus aureus	GCF_009739735.1_ASM973973v1	NZ_CP033995.1	Staphylococcus aureus strain P1D9C1 plasmid unnamed2, complete sequence
Staphylococcus aureus	GCF_009739755.1_ASM973975v1	NZ_CP033999.1	Staphylococcus aureus strain P1D8C2 chromosome, complete genome
Staphylococcus aureus	GCF_009739755.1_ASM973975v1	NZ_CP033997.1	Staphylococcus aureus strain P1D8C2 plasmid unnamed1, complete sequence
Staphylococcus aureus	GCF_009739755.1_ASM973975v1	NZ_CP033998.1	Staphylococcus aureus strain P1D8C2 plasmid unnamed2, complete sequence
Staphylococcus aureus	GCF_009739775.1_ASM973977v1	NZ_CP034002.1	Staphylococcus aureus strain P1D8C1 chromosome, complete genome
Staphylococcus aureus	GCF_009739775.1_ASM973977v1	NZ_CP034000.1	Staphylococcus aureus strain P1D8C1 plasmid unnamed1, complete sequence
Staphylococcus aureus	GCF_009739775.1_ASM973977v1	NZ_CP034001.1	Staphylococcus aureus strain P1D8C1 plasmid unnamed2, complete sequence
Staphylococcus aureus	GCF_009739795.1_ASM973979v1	NZ_CP034005.1	Staphylococcus aureus strain P1D7C1 chromosome, complete genome
Staphylococcus aureus	GCF_009739795.1_ASM973979v1	NZ_CP034003.1	Staphylococcus aureus strain P1D7C1 plasmid unnamed1, complete sequence
Staphylococcus aureus	GCF_009739795.1_ASM973979v1	NZ_CP034004.1	Staphylococcus aureus strain P1D7C1 plasmid unnamed2, complete sequence
Staphylococcus aureus	GCF_009739825.1_ASM973982v1	NZ_CP034011.1	Staphylococcus aureus strain P1D5C1 chromosome, complete genome
Staphylococcus aureus	GCF_009739825.1_ASM973982v1	NZ_CP034009.1	Staphylococcus aureus strain P1D5C1 plasmid unnamed1, complete sequence
Staphylococcus aureus	GCF_009739825.1_ASM973982v1	NZ_CP034010.1	Staphylococcus aureus strain P1D5C1 plasmid unnamed2, complete sequence
Staphylococcus aureus	GCF_009739845.1_ASM973984v1	NZ_CP034014.1	Staphylococcus aureus strain P1D1C1 chromosome, complete genome
Staphylococcus aureus	GCF_009739845.1_ASM973984v1	NZ_CP034012.1	Staphylococcus aureus strain P1D1C1 plasmid unnamed1, complete sequence
Staphylococcus aureus	GCF_009739845.1_ASM973984v1	NZ_CP034013.1	Staphylococcus aureus strain P1D1C1 plasmid unnamed2, complete sequence
Staphylococcus aureus	GCF_009739865.1_ASM973986v1	NZ_CP033990.1	Staphylococcus aureus strain P1D14C1 chromosome, complete genome
Staphylococcus aureus	GCF_009739865.1_ASM973986v1	NZ_CP033988.1	Staphylococcus aureus strain P1D14C1 plasmid unnamed1, complete sequence
Staphylococcus aureus	GCF_009739865.1_ASM973986v1	NZ_CP033989.1	Staphylococcus aureus strain P1D14C1 plasmid unnamed2, complete sequence
Staphylococcus aureus	GCF_009739885.1_ASM973988v1	NZ_CP034259.1	Staphylococcus aureus strain P1D12C1 chromosome, complete genome
Staphylococcus aureus	GCF_009739885.1_ASM973988v1	NZ_CP034258.1	Staphylococcus aureus strain P1D12C1 plasmid unnamed1, complete sequence
Staphylococcus aureus	GCF_009739885.1_ASM973988v1	NZ_CP034257.1	Staphylococcus aureus strain P1D12C1 plasmid unnamed2, complete sequence
Staphylococcus aureus	GCF_009740205.1_ASM974020v1	NZ_CP034008.1	Staphylococcus aureus strain P1D5C2 chromosome, complete genome
Staphylococcus aureus	GCF_009740205.1_ASM974020v1	NZ_CP034006.1	Staphylococcus aureus strain P1D5C2 plasmid unnamed1, complete sequence
Staphylococcus aureus	GCF_009740205.1_ASM974020v1	NZ_CP034007.1	Staphylococcus aureus strain P1D5C2 plasmid unnamed2, complete sequence
Staphylococcus aureus	GCF_009769095.1_ASM976909v1	NZ_CP043843.1	Staphylococcus aureus strain NCCP 16830 chromosome, complete genome
Staphylococcus aureus	GCF_009769095.1_ASM976909v1	NZ_CP043844.1	Staphylococcus aureus strain NCCP 16830 plasmid unnamed, complete sequence
Staphylococcus aureus	GCF_009857055.1_ASM985705v1	NZ_CP047321.1	Staphylococcus aureus strain RJ1267 chromosome, complete genome
Staphylococcus aureus	GCF_009857055.1_ASM985705v1	NZ_CP047322.1	Staphylococcus aureus strain RJ1267 plasmid unnamed, complete sequence
Staphylococcus aureus	GCF_009883675.1_ASM988367v1	NZ_CP033085.1	Staphylococcus aureus strain WH3018 chromosome
Staphylococcus aureus	GCF_009883695.1_ASM988369v1	NZ_CP033086.1	Staphylococcus aureus strain WH9628 chromosome
Staphylococcus aureus	GCF_009911815.1_ASM991181v1	NZ_CP047811.1	Staphylococcus aureus strain UP_1522 chromosome, complete genome
Staphylococcus aureus	GCF_009911815.1_ASM991181v1	NZ_CP047812.1	Staphylococcus aureus strain UP_1522 plasmid unnamed, complete sequence
Staphylococcus aureus	GCF_009911835.1_ASM991183v1	NZ_CP047777.1	Staphylococcus aureus strain UP_1632 chromosome, complete genome
Staphylococcus aureus	GCF_009911855.1_ASM991185v1	NZ_CP047817.1	Staphylococcus aureus strain UP_1433 chromosome, complete genome
Staphylococcus aureus	GCF_009911855.1_ASM991185v1	NZ_CP047818.1	Staphylococcus aureus strain UP_1433 plasmid unnamed1, complete sequence
Staphylococcus aureus	GCF_009911855.1_ASM991185v1	NZ_CP047819.1	Staphylococcus aureus strain UP_1433 plasmid unnamed2, complete sequence
Staphylococcus aureus	GCF_009911895.1_ASM991189v1	NZ_CP047789.1	Staphylococcus aureus strain UP_967 chromosome, complete genome
Staphylococcus aureus	GCF_009911965.1_ASM991196v1	NZ_CP047820.1	Staphylococcus aureus strain UP_1395 chromosome, complete genome
Staphylococcus aureus	GCF_009911965.1_ASM991196v1	NZ_CP047821.1	Staphylococcus aureus strain UP_1395 plasmid unnamed, complete sequence
Staphylococcus aureus	GCF_009912015.1_ASM991201v1	NZ_CP047813.1	Staphylococcus aureus strain UP_1500 chromosome, complete genome
Staphylococcus aureus	GCF_009912015.1_ASM991201v1	NZ_CP047814.1	Staphylococcus aureus strain UP_1500 plasmid unnamed, complete sequence
Staphylococcus aureus	GCF_009912035.1_ASM991203v1	NZ_CP047778.1	Staphylococcus aureus strain UP_1572 chromosome, complete genome
Staphylococcus aureus	GCF_009912055.1_ASM991205v1	NZ_CP047807.1	Staphylococcus aureus strain UP_1612 chromosome, complete genome
Staphylococcus aureus	GCF_009912055.1_ASM991205v1	NZ_CP047808.1	Staphylococcus aureus strain UP_1612 plasmid unnamed, complete sequence
Staphylococcus aureus	GCF_009912075.1_ASM991207v1	NZ_CP047805.1	Staphylococcus aureus strain UP_1654 chromosome, complete genome
Staphylococcus aureus	GCF_009912075.1_ASM991207v1	NZ_CP047806.1	Staphylococcus aureus strain UP_1654 plasmid unnamed, complete sequence
Staphylococcus aureus	GCF_009912095.1_ASM991209v1	NZ_CP047784.1	Staphylococcus aureus strain UP_1209 chromosome, complete genome
Staphylococcus aureus	GCF_009912115.1_ASM991211v1	NZ_CP047792.1	Staphylococcus aureus strain UP_794 chromosome, complete genome
Staphylococcus aureus	GCF_009912155.1_ASM991215v1	NZ_CP047779.1	Staphylococcus aureus strain UP_1559 chromosome, complete genome
Staphylococcus aureus	GCF_009912195.1_ASM991219v1	NZ_CP047822.1	Staphylococcus aureus strain UP_1278 chromosome, complete genome
Staphylococcus aureus	GCF_009912195.1_ASM991219v1	NZ_CP047823.1	Staphylococcus aureus strain UP_1278 plasmid unnamed1, complete sequence
Staphylococcus aureus	GCF_009912195.1_ASM991219v1	NZ_CP047824.1	Staphylococcus aureus strain UP_1278 plasmid unnamed2, complete sequence
Staphylococcus aureus	GCF_009912195.1_ASM991219v1	NZ_CP047825.1	Staphylococcus aureus strain UP_1278 plasmid unnamed3, complete sequence
Staphylococcus aureus	GCF_009912255.1_ASM991225v1	NZ_CP047833.1	Staphylococcus aureus strain UP_926 chromosome, complete genome
Staphylococcus aureus	GCF_009912255.1_ASM991225v1	NZ_CP047834.1	Staphylococcus aureus strain UP_926 plasmid unnamed, complete sequence
Staphylococcus aureus	GCF_009912295.1_ASM991229v1	NZ_CP047780.1	Staphylococcus aureus strain UP_1539 chromosome, complete genome
Staphylococcus aureus	GCF_009912335.1_ASM991233v1	NZ_CP047783.1	Staphylococcus aureus strain UP_1313 chromosome, complete genome
Staphylococcus aureus	GCF_009912355.1_ASM991235v1	NZ_CP047826.1	Staphylococcus aureus strain UP_1239 chromosome, complete genome
Staphylococcus aureus	GCF_009912355.1_ASM991235v1	NZ_CP047827.1	Staphylococcus aureus strain UP_1239 plasmid unnamed, complete sequence
Staphylococcus aureus	GCF_009912375.1_ASM991237v1	NZ_CP047828.1	Staphylococcus aureus strain UP_1073 chromosome, complete genome
Staphylococcus aureus	GCF_009912375.1_ASM991237v1	NZ_CP047829.1	Staphylococcus aureus strain UP_1073 plasmid unnamed, complete sequence
Staphylococcus aureus	GCF_009912415.1_ASM991241v1	NZ_CP047815.1	Staphylococcus aureus strain UP_1484 chromosome, complete genome
Staphylococcus aureus	GCF_009912415.1_ASM991241v1	NZ_CP047816.1	Staphylococcus aureus strain UP_1484 plasmid unnamed, complete sequence
Staphylococcus aureus	GCF_009912435.1_ASM991243v1	NZ_CP047781.1	Staphylococcus aureus strain UP_1452 chromosome, complete genome
Staphylococcus aureus	GCF_009912455.1_ASM991245v1	NZ_CP047787.1	Staphylococcus aureus strain UP_1108 chromosome, complete genome
Staphylococcus aureus	GCF_009912475.1_ASM991247v1	NZ_CP047782.1	Staphylococcus aureus strain UP_1352 chromosome, complete genome
Staphylococcus aureus	GCF_009912495.1_ASM991249v1	NZ_CP047785.1	Staphylococcus aureus strain UP_1186 chromosome, complete genome
Staphylococcus aureus	GCF_009912535.1_ASM991253v1	NZ_CP047786.1	Staphylococcus aureus strain UP_1150 chromosome, complete genome
Staphylococcus aureus	GCF_009912555.1_ASM991255v1	NZ_CP047835.1	Staphylococcus aureus strain UP_883 chromosome, complete genome
Staphylococcus aureus	GCF_009912555.1_ASM991255v1	NZ_CP047836.1	Staphylococcus aureus strain UP_883 plasmid unnamed, complete sequence
Staphylococcus aureus	GCF_009912595.1_ASM991259v1	NZ_CP047788.1	Staphylococcus aureus strain UP_1033 chromosome, complete genome
Staphylococcus aureus	GCF_009912615.1_ASM991261v1	NZ_CP047790.1	Staphylococcus aureus strain UP_830 chromosome, complete genome
Staphylococcus aureus	GCF_009912635.1_ASM991263v1	NZ_CP047795.1	Staphylococcus aureus strain UP_490 chromosome, complete genome
Staphylococcus aureus	GCF_009912655.1_ASM991265v1	NZ_CP047830.1	Staphylococcus aureus strain UP_996 chromosome, complete genome
Staphylococcus aureus	GCF_009912655.1_ASM991265v1	NZ_CP047831.1	Staphylococcus aureus strain UP_996 plasmid unnamed1, complete sequence
Staphylococcus aureus	GCF_009912655.1_ASM991265v1	NZ_CP047832.1	Staphylococcus aureus strain UP_996 plasmid unnamed2, complete sequence
Staphylococcus aureus	GCF_009912675.1_ASM991267v1	NZ_CP047793.1	Staphylococcus aureus strain UP_764 chromosome, complete genome
Staphylococcus aureus	GCF_009912695.1_ASM991269v1	NZ_CP047837.1	Staphylococcus aureus strain UP_719 chromosome, complete genome
Staphylococcus aureus	GCF_009912695.1_ASM991269v1	NZ_CP047838.1	Staphylococcus aureus strain UP_719 plasmid unnamed, complete sequence
Staphylococcus aureus	GCF_009912715.1_ASM991271v1	NZ_CP047791.1	Staphylococcus aureus strain UP_818 chromosome, complete genome
Staphylococcus aureus	GCF_009912735.1_ASM991273v1	NZ_CP047839.1	Staphylococcus aureus strain UP_678 chromosome, complete genome
Staphylococcus aureus	GCF_009912735.1_ASM991273v1	NZ_CP047840.1	Staphylococcus aureus strain UP_678 plasmid unnamed, complete sequence
Staphylococcus aureus	GCF_009912755.1_ASM991275v1	NZ_CP047847.1	Staphylococcus aureus strain UP_522 chromosome, complete genome
Staphylococcus aureus	GCF_009912755.1_ASM991275v1	NZ_CP047848.1	Staphylococcus aureus strain UP_522 plasmid unnamed, complete sequence
Staphylococcus aureus	GCF_009912775.1_ASM991277v1	NZ_CP047841.1	Staphylococcus aureus strain UP_644 chromosome, complete genome
Staphylococcus aureus	GCF_009912775.1_ASM991277v1	NZ_CP047842.1	Staphylococcus aureus strain UP_644 plasmid unnamed, complete sequence
Staphylococcus aureus	GCF_009912795.1_ASM991279v1	NZ_CP047801.1	Staphylococcus aureus strain UP_248 chromosome, complete genome
Staphylococcus aureus	GCF_009912815.1_ASM991281v1	NZ_CP047798.1	Staphylococcus aureus strain UP_378 chromosome, complete genome
Staphylococcus aureus	GCF_009912835.1_ASM991283v1	NZ_CP047796.1	Staphylococcus aureus strain UP_462 chromosome, complete genome
Staphylococcus aureus	GCF_009912855.1_ASM991285v1	NZ_CP047843.1	Staphylococcus aureus strain UP_620 chromosome, complete genome
Staphylococcus aureus	GCF_009912855.1_ASM991285v1	NZ_CP047844.1	Staphylococcus aureus strain UP_620 plasmid unnamed, complete sequence
Staphylococcus aureus	GCF_009912875.1_ASM991287v1	NZ_CP047845.1	Staphylococcus aureus strain UP_591 chromosome, complete genome
Staphylococcus aureus	GCF_009912875.1_ASM991287v1	NZ_CP047846.1	Staphylococcus aureus strain UP_591 plasmid unnamed, complete sequence
Staphylococcus aureus	GCF_009912895.1_ASM991289v1	NZ_CP047856.1	Staphylococcus aureus strain UP_1435 chromosome, complete genome
Staphylococcus aureus	GCF_009912895.1_ASM991289v1	NZ_CP047857.1	Staphylococcus aureus strain UP_1435 plasmid unnamed1, complete sequence
Staphylococcus aureus	GCF_009912895.1_ASM991289v1	NZ_CP047858.1	Staphylococcus aureus strain UP_1435 plasmid unnamed2, complete sequence
Staphylococcus aureus	GCF_009912915.1_ASM991291v1	NZ_CP047849.1	Staphylococcus aureus strain UP_403 chromosome, complete genome
Staphylococcus aureus	GCF_009912915.1_ASM991291v1	NZ_CP047850.1	Staphylococcus aureus strain UP_403 plasmid unnamed, complete sequence
Staphylococcus aureus	GCF_009912935.1_ASM991293v1	NZ_CP047794.1	Staphylococcus aureus strain UP_551 chromosome, complete genome
Staphylococcus aureus	GCF_009912955.1_ASM991295v1	NZ_CP047797.1	Staphylococcus aureus strain UP_426 chromosome, complete genome
Staphylococcus aureus	GCF_009912975.1_ASM991297v1	NZ_CP047867.1	Staphylococcus aureus strain UP_419 chromosome, complete genome
Staphylococcus aureus	GCF_009912975.1_ASM991297v1	NZ_CP047868.1	Staphylococcus aureus strain UP_419 plasmid unnamed, complete sequence
Staphylococcus aureus	GCF_009912995.1_ASM991299v1	NZ_CP047804.1	Staphylococcus aureus strain UP_774 chromosome, complete genome
Staphylococcus aureus	GCF_009913015.1_ASM991301v1	NZ_CP047865.1	Staphylococcus aureus strain UP_844 chromosome, complete genome
Staphylococcus aureus	GCF_009913015.1_ASM991301v1	NZ_CP047866.1	Staphylococcus aureus strain UP_844 plasmid unnamed, complete sequence
Staphylococcus aureus	GCF_009913035.1_ASM991303v1	NZ_CP047852.1	Staphylococcus aureus strain UP_274 chromosome, complete genome
Staphylococcus aureus	GCF_009913035.1_ASM991303v1	NZ_CP047853.1	Staphylococcus aureus strain UP_274 plasmid unnamed, complete sequence
Staphylococcus aureus	GCF_009913055.1_ASM991305v1	NZ_CP047800.1	Staphylococcus aureus strain UP_296 chromosome, complete genome
Staphylococcus aureus	GCF_009913075.1_ASM991307v1	NZ_CP047799.1	Staphylococcus aureus strain UP_322 chromosome, complete genome
Staphylococcus aureus	GCF_009913095.1_ASM991309v1	NZ_CP047859.1	Staphylococcus aureus strain UP_1405 chromosome, complete genome
Staphylococcus aureus	GCF_009913095.1_ASM991309v1	NZ_CP047860.1	Staphylococcus aureus strain UP_1405 plasmid unnamed, complete sequence
Staphylococcus aureus	GCF_009913115.1_ASM991311v1	NZ_CP047803.1	Staphylococcus aureus strain UP_1097 chromosome, complete genome
Staphylococcus aureus	GCF_009913135.1_ASM991313v1	NZ_CP047854.1	Staphylococcus aureus strain UP_1525 chromosome, complete genome
Staphylococcus aureus	GCF_009913135.1_ASM991313v1	NZ_CP047855.1	Staphylococcus aureus strain UP_1525 plasmid unnamed, complete sequence
Staphylococcus aureus	GCF_009913155.1_ASM991315v1	NZ_CP047861.1	Staphylococcus aureus strain UP_1322 chromosome, complete genome
Staphylococcus aureus	GCF_009913155.1_ASM991315v1	NZ_CP047862.1	Staphylococcus aureus strain UP_1322 plasmid unnamed, complete sequence
Staphylococcus aureus	GCF_009913175.1_ASM991317v1	NZ_CP047863.1	Staphylococcus aureus strain UP_1106 chromosome, complete genome
Staphylococcus aureus	GCF_009913175.1_ASM991317v1	NZ_CP047864.1	Staphylococcus aureus strain UP_1106 plasmid unnamed, complete sequence
Staphylococcus aureus	GCF_009913195.1_ASM991319v1	NZ_CP047802.1	Staphylococcus aureus strain UP_1442 chromosome, complete genome
Staphylococcus aureus	GCF_009913215.1_ASM991321v1	NZ_CP047851.1	Staphylococcus aureus strain UP_338 chromosome, complete genome
Staphylococcus aureus	GCF_009914455.1_ASM991445v1	NZ_CP045468.1	Staphylococcus aureus strain SAW1 chromosome, complete genome
Staphylococcus aureus	GCF_009914455.1_ASM991445v1	NZ_CP045469.1	Staphylococcus aureus strain SAW1 plasmid pSAW1-2, complete sequence
Staphylococcus aureus	GCF_009914455.1_ASM991445v1	NZ_CP045470.1	Staphylococcus aureus strain SAW1 plasmid pSAW1-3, complete sequence
Staphylococcus aureus	GCF_009914455.1_ASM991445v1	NZ_CP045471.1	Staphylococcus aureus strain SAW1 plasmid pSAW1-4, complete sequence
Staphylococcus aureus	GCF_009937785.1_ASM993778v1	NZ_CP047809.1	Staphylococcus aureus strain UP_1591 chromosome, complete genome
Staphylococcus aureus	GCF_009937785.1_ASM993778v1	NZ_CP047810.1	Staphylococcus aureus strain UP_1591 plasmid unnamed, complete sequence
Staphylococcus aureus	GCF_010669265.1_ASM1066926v1	NZ_CP048643.1	Staphylococcus aureus strain SR153 chromosome, complete genome
Staphylococcus aureus	GCF_010669265.1_ASM1066926v1	NZ_CP048644.1	Staphylococcus aureus strain SR153 plasmid pSR01, complete sequence
Staphylococcus aureus	GCF_010669265.1_ASM1066926v1	NZ_CP048645.1	Staphylococcus aureus strain SR153 plasmid pSR02, complete sequence
Staphylococcus aureus	GCF_010669265.1_ASM1066926v1	NZ_CP048646.1	Staphylococcus aureus strain SR153 plasmid pSR03, complete sequence
Staphylococcus aureus	GCF_011032785.1_ASM1103278v1	NZ_CP048431.1	Staphylococcus aureus strain SA1428 chromosome, complete genome
Staphylococcus aureus	GCF_011032785.1_ASM1103278v1	NZ_CP048432.1	Staphylococcus aureus strain SA1428 plasmid p1
Staphylococcus aureus	GCF_011035105.1_ASM1103510v1	NZ_CP047021.1	Staphylococcus aureus strain M2024 chromosome, complete genome
Staphylococcus aureus	GCF_011035105.1_ASM1103510v1	NZ_CP047022.1	Staphylococcus aureus strain M2024 plasmid pl1_M2024, complete sequence
Staphylococcus aureus	GCF_012044215.1_ASM1204421v1	NZ_CP050690.1	Staphylococcus aureus strain PMB179-1 chromosome, complete genome
Staphylococcus aureus	GCF_012044475.1_ASM1204447v1	NZ_CP050691.1	Staphylococcus aureus strain PMB196-1 chromosome, complete genome
Staphylococcus aureus	GCF_012974825.1_ASM1297482v1	NZ_CP038229.1	Staphylococcus aureus strain MJ163 chromosome, complete genome
Staphylococcus aureus	GCF_012974825.1_ASM1297482v1	NZ_CP038230.1	Staphylococcus aureus strain MJ163 plasmid unnamed1, complete sequence
Staphylococcus aureus	GCF_013003945.1_ASM1300394v1	NZ_CP053070.1	Staphylococcus aureus strain HL20709 isolate HL20709 chromosome, complete genome
Staphylococcus aureus	GCF_013004085.1_ASM1300408v1	NZ_CP053075.1	Staphylococcus aureus strain SA01 chromosome, complete genome
Staphylococcus aureus	GCF_013004085.1_ASM1300408v1	NZ_CP053077.1	Staphylococcus aureus strain SA01 plasmid pSA01-03, complete sequence
Staphylococcus aureus	GCF_013004085.1_ASM1300408v1	NZ_CP053078.1	Staphylococcus aureus strain SA01 plasmid pSA01-04, complete sequence
Staphylococcus aureus	GCF_013004085.1_ASM1300408v1	NZ_CP053076.1	Staphylococcus aureus strain SA01 plasmid pSA01-tet, complete sequence
Staphylococcus aureus	GCF_013008375.1_ASM1300837v1	NZ_CP053101.1	Staphylococcus aureus strain EDCC5398 chromosome, complete genome
Staphylococcus aureus	GCF_013046865.1_ASM1304686v1	NZ_CP053185.1	Staphylococcus aureus strain Guangzhou-SAU749 chromosome, complete genome
Staphylococcus aureus	GCF_013046865.1_ASM1304686v1	NZ_CP053186.1	Staphylococcus aureus strain Guangzhou-SAU749 plasmid pSAU749, complete sequence
Staphylococcus aureus	GCF_013046885.1_ASM1304688v1	NZ_CP053183.1	Staphylococcus aureus strain Guangzhou-SAU071 chromosome, complete genome
Staphylococcus aureus	GCF_013046885.1_ASM1304688v1	NZ_CP053184.1	Staphylococcus aureus strain Guangzhou-SAU071 plasmid pSAU071, complete sequence
Staphylococcus aureus	GCF_013187685.1_ASM1318768v1	NZ_CP029751.1	Staphylococcus aureus strain Smith chromosome, complete genome
Staphylococcus aureus	GCF_013187685.1_ASM1318768v1	NZ_CP029750.1	Staphylococcus aureus strain Smith plasmid pSS41, complete sequence
Staphylococcus aureus	GCF_013305885.1_ASM1330588v1	NZ_CP053634.1	Staphylococcus aureus strain 14638 chromosome, complete genome
Staphylococcus aureus	GCF_013305885.1_ASM1330588v1	NZ_CP053635.1	Staphylococcus aureus strain 14638 plasmid unnamed, complete sequence
Staphylococcus aureus	GCF_013305905.1_ASM1330590v1	NZ_CP053636.1	Staphylococcus aureus strain 14640 chromosome, complete genome
Staphylococcus aureus	GCF_013305905.1_ASM1330590v1	NZ_CP053637.1	Staphylococcus aureus strain 14640 plasmid unnamed, complete sequence
Staphylococcus aureus	GCF_013305955.1_ASM1330595v1	NZ_CP053640.1	Staphylococcus aureus strain 14505 chromosome, complete genome
Staphylococcus aureus	GCF_013305955.1_ASM1330595v1	NZ_CP053641.1	Staphylococcus aureus strain 14505 plasmid unnamed, complete sequence
Staphylococcus aureus	GCF_013307005.2_ASM1330700v2	NZ_CP053353.1	Staphylococcus aureus strain 16405 chromosome, complete genome
Staphylococcus aureus	GCF_013307005.2_ASM1330700v2	NZ_CP053354.1	Staphylococcus aureus strain 16405 plasmid unnamed, complete sequence
Staphylococcus aureus	GCF_013307025.1_ASM1330702v1	NZ_CP053356.1	Staphylococcus aureus strain 14507 chromosome, complete genome
Staphylococcus aureus	GCF_013307025.1_ASM1330702v1	NZ_CP053355.1	Staphylococcus aureus strain 14507 plasmid unnamed, complete sequence
Staphylococcus aureus	GCF_013307065.1_ASM1330706v1	NZ_CP053639.1	Staphylococcus aureus strain 14732 chromosome, complete genome
Staphylococcus aureus	GCF_013307065.1_ASM1330706v1	NZ_CP053638.1	Staphylococcus aureus strain 14732 plasmid unnamed, complete sequence
Staphylococcus aureus	GCF_013307085.1_ASM1330708v1	NZ_CP038183.1	Staphylococcus aureus strain MJ015 chromosome, complete genome
Staphylococcus aureus	GCF_013307085.1_ASM1330708v1	NZ_CP038184.1	Staphylococcus aureus strain MJ015 plasmid unnamed1, complete sequence
Staphylococcus aureus	GCF_013307085.1_ASM1330708v1	NZ_CP038185.1	Staphylococcus aureus strain MJ015 plasmid unnamed2, complete sequence
Staphylococcus aureus	GCF_013363895.1_ASM1336389v1	NZ_CP054876.1	Staphylococcus aureus strain Dresden-275757 chromosome, complete genome
Staphylococcus aureus	GCF_013389715.1_ASM1338971v1	NZ_CP058312.1	Staphylococcus aureus strain BLR-DV chromosome, complete genome
Staphylococcus aureus	GCF_013389715.1_ASM1338971v1	NZ_CP058313.1	Staphylococcus aureus strain BLR-DV plasmid pSTA-BLR-MRSA-DV-1, complete sequence
Staphylococcus aureus	GCF_013389715.1_ASM1338971v1	NZ_CP058314.1	Staphylococcus aureus strain BLR-DV plasmid pSTA-BLR-MRSA-DV-2, complete sequence
Staphylococcus aureus	GCF_013394425.1_ASM1339442v1	NZ_AP023034.1	Staphylococcus aureus strain TPS3156 chromosome, complete genome
Staphylococcus aureus	GCF_013394425.1_ASM1339442v1	NZ_AP023035.1	Staphylococcus aureus strain TPS3156 plasmid pTPS3156, complete sequence
Staphylococcus aureus	GCF_013415955.1_ASM1341595v1	NZ_CP045435.1	Staphylococcus aureus strain 08-028 chromosome, complete genome
Staphylococcus aureus	GCF_013415955.1_ASM1341595v1	NZ_CP045436.1	Staphylococcus aureus strain 08-028 plasmid p08-028a, complete sequence
Staphylococcus aureus	GCF_013415955.1_ASM1341595v1	NZ_CP045437.1	Staphylococcus aureus strain 08-028 plasmid p08-028b, complete sequence
Staphylococcus aureus	GCF_013415955.1_ASM1341595v1	NZ_CP045438.1	Staphylococcus aureus strain 08-028 plasmid p08-028c, complete sequence
Staphylococcus aureus	GCF_013467165.1_ASM1346716v1	NZ_CP059156.1	Staphylococcus aureus strain WKZ-1 chromosome, complete genome
Staphylococcus aureus	GCF_013467405.1_ASM1346740v1	NZ_CP059155.1	Staphylococcus aureus strain WKZ-2 chromosome, complete genome
Staphylococcus aureus	GCF_013836525.1_ASM1383652v1	NZ_CP058615.1	Staphylococcus aureus strain 110900 chromosome, complete genome
Staphylococcus aureus	GCF_013836525.1_ASM1383652v1	NZ_CP058616.1	Staphylococcus aureus strain 110900 plasmid unnamed, complete sequence
Staphylococcus aureus	GCF_013836745.1_ASM1383674v1	NZ_CP058613.1	Staphylococcus aureus strain 128254 chromosome, complete genome
Staphylococcus aureus	GCF_013836745.1_ASM1383674v1	NZ_CP058614.1	Staphylococcus aureus strain 128254 plasmid unnamed, complete sequence
Staphylococcus aureus	GCF_014334395.1_ASM1433439v1	NZ_CP060596.1	Staphylococcus aureus strain K246 chromosome
Staphylococcus aureus	GCF_014334415.1_ASM1433441v1	NZ_CP060597.1	Staphylococcus aureus strain K245 chromosome
Staphylococcus aureus	GCF_014334435.1_ASM1433443v1	NZ_CP060598.1	Staphylococcus aureus strain K104 chromosome
Staphylococcus aureus	GCF_014334455.1_ASM1433445v1	NZ_CP060599.1	Staphylococcus aureus strain K099 chromosome
Staphylococcus aureus	GCF_014334475.1_ASM1433447v1	NZ_CP060600.1	Staphylococcus aureus strain K094 chromosome
Staphylococcus aureus	GCF_014334495.1_ASM1433449v1	NZ_CP060601.1	Staphylococcus aureus strain K090 chromosome
Staphylococcus aureus	GCF_014334515.1_ASM1433451v1	NZ_CP060602.1	Staphylococcus aureus strain K152 chromosome
Staphylococcus aureus	GCF_014334535.1_ASM1433453v1	NZ_CP060603.1	Staphylococcus aureus strain K150 chromosome
Staphylococcus aureus	GCF_014334555.1_ASM1433455v1	NZ_CP060604.1	Staphylococcus aureus strain K112 chromosome
Staphylococcus aureus	GCF_014334575.1_ASM1433457v1	NZ_CP060605.1	Staphylococcus aureus strain K329 chromosome
Staphylococcus aureus	GCF_014334595.1_ASM1433459v1	NZ_CP060606.1	Staphylococcus aureus strain K276 chromosome
Staphylococcus aureus	GCF_014334615.1_ASM1433461v1	NZ_CP060607.1	Staphylococcus aureus strain K275 chromosome
Staphylococcus aureus	GCF_014334635.1_ASM1433463v1	NZ_CP060608.1	Staphylococcus aureus strain K084 chromosome
Staphylococcus aureus	GCF_014334655.1_ASM1433465v1	NZ_CP060609.1	Staphylococcus aureus strain K078 chromosome
Staphylococcus aureus	GCF_014334675.1_ASM1433467v1	NZ_CP060610.1	Staphylococcus aureus strain K076 chromosome
Staphylococcus aureus	GCF_014334695.1_ASM1433469v1	NZ_CP060611.1	Staphylococcus aureus strain K216 chromosome
Staphylococcus aureus	GCF_014335435.1_ASM1433543v1	NZ_CP060614.1	Staphylococcus aureus strain S4 chromosome
Staphylococcus aureus	GCF_014335605.1_ASM1433560v1	NZ_CP060613.1	Staphylococcus aureus strain S5 chromosome
Staphylococcus aureus	GCF_014335755.1_ASM1433575v1	NZ_CP060615.1	Staphylococcus aureus strain S3 chromosome
Staphylococcus aureus	GCF_014335895.1_ASM1433589v1	NZ_CP060616.1	Staphylococcus aureus strain S2 chromosome
Staphylococcus aureus	GCF_014336015.1_ASM1433601v1	NZ_CP060617.1	Staphylococcus aureus strain S1 chromosome
Staphylococcus aureus	GCF_014336685.1_ASM1433668v1	NZ_CP060621.1	Staphylococcus aureus strain R34 chromosome
Staphylococcus aureus	GCF_014336835.1_ASM1433683v1	NZ_CP060622.1	Staphylococcus aureus strain R31 chromosome
Staphylococcus aureus	GCF_014336965.1_ASM1433696v1	NZ_CP060623.1	Staphylococcus aureus strain R28 chromosome
Staphylococcus aureus	GCF_014336995.1_ASM1433699v1	NZ_CP060624.1	Staphylococcus aureus strain R27 chromosome
Staphylococcus aureus	GCF_014337015.1_ASM1433701v1	NZ_CP060625.1	Staphylococcus aureus strain R26 chromosome
Staphylococcus aureus	GCF_014337035.1_ASM1433703v1	NZ_CP060626.1	Staphylococcus aureus strain R24 chromosome
Staphylococcus aureus	GCF_014337055.1_ASM1433705v1	NZ_CP060627.1	Staphylococcus aureus strain R21 chromosome
Staphylococcus aureus	GCF_014337075.1_ASM1433707v1	NZ_CP060628.1	Staphylococcus aureus strain R20 chromosome
Staphylococcus aureus	GCF_014337095.1_ASM1433709v1	NZ_CP060629.1	Staphylococcus aureus strain R16 chromosome
Staphylococcus aureus	GCF_014337135.1_ASM1433713v1	NZ_CP060631.1	Staphylococcus aureus strain R3 chromosome
Staphylococcus aureus	GCF_014792825.1_ASM1479282v1	NZ_CP032161.1	Staphylococcus aureus strain SA H27 chromosome
Staphylococcus aureus	GCF_014838785.1_ASM1483878v1	NZ_CP032160.1	Staphylococcus aureus strain SA G5 chromosome
Staphylococcus aureus	GCF_015219885.1_ASM1521988v1	NZ_CP062469.1	Staphylococcus aureus strain MRSA - AMRF 4 chromosome, complete genome
Staphylococcus aureus	GCF_015219885.1_ASM1521988v1	NZ_CP062470.1	Staphylococcus aureus strain MRSA - AMRF 4 plasmid pSaa6159, complete sequence
Staphylococcus aureus	GCF_015219905.1_ASM1521990v1	NZ_CP062467.1	Staphylococcus aureus strain MRSA - AMRF 5 chromosome, complete genome
Staphylococcus aureus	GCF_015219905.1_ASM1521990v1	NZ_CP062468.1	Staphylococcus aureus strain MRSA - AMRF 5 plasmid pKH18, complete sequence
Staphylococcus aureus	GCF_015219925.1_ASM1521992v1	NZ_CP062465.1	Staphylococcus aureus strain MRSA - AMRF 6 chromosome, complete genome
Staphylococcus aureus	GCF_015219925.1_ASM1521992v1	NZ_CP062466.1	Staphylococcus aureus strain MRSA - AMRF 6 plasmid pSaa6159, complete sequence
Staphylococcus aureus	GCF_015220695.1_ASM1522069v1	NZ_CP062471.1	Staphylococcus aureus strain MRSA - AMRF 3 chromosome, complete genome
Staphylococcus aureus	GCF_015220695.1_ASM1522069v1	NZ_CP062472.1	Staphylococcus aureus strain MRSA - AMRF 3 plasmid pKH18, complete sequence
Staphylococcus aureus	GCF_015224275.1_ASM1522427v1	NZ_CP063686.1	Staphylococcus aureus strain K25C chromosome
Staphylococcus aureus	GCF_015244035.1_ASM1524403v1	NZ_CP060584.1	Staphylococcus aureus strain WH52 chromosome, complete genome
Staphylococcus aureus	GCF_015277595.1_ASM1527759v1	NZ_CP063801.1	Staphylococcus aureus strain KHS103 chromosome
Staphylococcus aureus	GCF_015277615.1_ASM1527761v1	NZ_CP063802.1	Staphylococcus aureus strain KM24 chromosome
Staphylococcus aureus	GCF_015475575.1_ASM1547557v1	NZ_CP055225.1	Staphylococcus aureus LAC chromosome, complete genome
Staphylococcus aureus	GCF_015475575.1_ASM1547557v1	NZ_CP055226.1	Staphylococcus aureus LAC plasmid unnamed, complete sequence
Staphylococcus aureus	GCF_015732455.1_ASM1573245v1	NZ_CP061349.1	Staphylococcus aureus strain MSSA01 chromosome, complete genome
Staphylococcus aureus	GCF_015767475.1_ASM1576747v1	NZ_CP065199.1	Staphylococcus aureus strain DG36 chromosome, complete genome
Staphylococcus aureus	GCF_015767475.1_ASM1576747v1	NZ_CP065200.1	Staphylococcus aureus strain DG36 plasmid unnamed1, complete sequence
Staphylococcus aureus	GCF_015767475.1_ASM1576747v1	NZ_CP065201.1	Staphylococcus aureus strain DG36 plasmid unnamed2, complete sequence
Staphylococcus aureus	GCF_015767495.1_ASM1576749v1	NZ_CP065194.1	Staphylococcus aureus strain GDC6P096P chromosome, complete genome
Staphylococcus aureus	GCF_015767495.1_ASM1576749v1	NZ_CP065195.1	Staphylococcus aureus strain GDC6P096P plasmid unnamed1, complete sequence
Staphylococcus aureus	GCF_015767495.1_ASM1576749v1	NZ_CP065196.1	Staphylococcus aureus strain GDC6P096P plasmid unnamed2, complete sequence
Staphylococcus aureus	GCF_015767495.1_ASM1576749v1	NZ_CP065197.1	Staphylococcus aureus strain GDC6P096P plasmid unnamed3, complete sequence
Staphylococcus aureus	GCF_015767495.1_ASM1576749v1	NZ_CP065198.1	Staphylococcus aureus strain GDC6P096P plasmid unnamed4, complete sequence
Staphylococcus aureus	GCF_015774815.1_ASM1577481v1	NZ_CP065353.1	Staphylococcus aureus strain AR39_O1_merpol chromosome, complete genome
Staphylococcus aureus	GCF_015774835.1_ASM1577483v1	NZ_CP065355.1	Staphylococcus aureus strain JW31330_O1_dhc chromosome, complete genome
Staphylococcus aureus	GCF_015774855.1_ASM1577485v1	NZ_CP065354.1	Staphylococcus aureus strain JW_comp_novo chromosome, complete genome
Staphylococcus aureus	GCF_015999445.1_ASM1599944v1	NZ_CP065515.1	Staphylococcus aureus strain GDY8P96A chromosome, complete genome
Staphylococcus aureus	GCF_015999445.1_ASM1599944v1	NZ_CP065516.1	Staphylococcus aureus strain GDY8P96A plasmid pY96A, complete sequence
Staphylococcus aureus	GCF_016065215.1_ASM1606521v1	NZ_CP065857.1	Staphylococcus aureus strain CC1153-MRSA chromosome, complete genome
Staphylococcus aureus	GCF_016413705.1_ASM1641370v1	NZ_CP066488.1	Staphylococcus aureus strain ncr_155_F133 chromosome, complete genome
Staphylococcus aureus	GCF_016413705.1_ASM1641370v1	NZ_CP066489.1	Staphylococcus aureus strain ncr_155_F133 plasmid unnamed1, complete sequence
Staphylococcus aureus	GCF_016413705.1_ASM1641370v1	NZ_CP066490.1	Staphylococcus aureus strain ncr_155_F133 plasmid unnamed2, complete sequence
Staphylococcus aureus	GCF_016413705.1_ASM1641370v1	NZ_CP066491.1	Staphylococcus aureus strain ncr_155_F133 plasmid unnamed3, complete sequence
Staphylococcus aureus	GCF_016413725.1_ASM1641372v1	NZ_CP066492.1	Staphylococcus aureus strain nan_175_F371_ch chromosome, complete genome
Staphylococcus aureus	GCF_016413725.1_ASM1641372v1	NZ_CP066493.1	Staphylococcus aureus strain nan_175_F371_ch plasmid unnamed1, complete sequence
Staphylococcus aureus	GCF_016413725.1_ASM1641372v1	NZ_CP066494.1	Staphylococcus aureus strain nan_175_F371_ch plasmid unnamed2, complete sequence
Staphylococcus aureus	GCF_016413725.1_ASM1641372v1	NZ_CP066495.1	Staphylococcus aureus strain nan_175_F371_ch plasmid unnamed3, complete sequence
Staphylococcus aureus	GCF_016496025.1_ASM1649602v1	NZ_CP060491.1	Staphylococcus aureus strain WH39 chromosome, complete genome
Staphylococcus aureus	GCF_016496025.1_ASM1649602v1	NZ_CP060492.1	Staphylococcus aureus strain WH39 plasmid pWH39, complete sequence
Staphylococcus aureus	GCF_016591995.1_ASM1659199v1	NZ_AP024170.1	Staphylococcus aureus strain 834 chromosome, complete genome
Staphylococcus aureus	GCF_016591995.1_ASM1659199v1	NZ_AP024171.1	Staphylococcus aureus strain 834 plasmid p834, complete sequence
Staphylococcus aureus	GCF_016727585.1_ASM1672758v1	NZ_CP068143.1	Staphylococcus aureus strain FDAARGOS_1086 chromosome, complete genome
Staphylococcus aureus	GCF_016727585.1_ASM1672758v1	NZ_CP068144.1	Staphylococcus aureus strain FDAARGOS_1086 plasmid unnamed, complete sequence
Staphylococcus aureus	GCF_016889145.1_ASM1688914v1	NZ_CP069470.1	Staphylococcus aureus strain FDAARGOS_1246 chromosome, complete genome
Staphylococcus aureus	GCF_016889145.1_ASM1688914v1	NZ_CP069471.1	Staphylococcus aureus strain FDAARGOS_1246 plasmid unnamed1, complete sequence
Staphylococcus aureus	GCF_016889145.1_ASM1688914v1	NZ_CP069472.1	Staphylococcus aureus strain FDAARGOS_1246 plasmid unnamed2, complete sequence
Staphylococcus aureus	GCF_016889945.1_ASM1688994v1	NZ_CP069565.1	Staphylococcus aureus strain FDAARGOS_1245 chromosome, complete genome
Staphylococcus aureus	GCF_016889945.1_ASM1688994v1	NZ_CP069566.1	Staphylococcus aureus strain FDAARGOS_1245 plasmid unnamed, complete sequence
Staphylococcus aureus	GCF_016894285.1_ASM1689428v1	NZ_CP069799.1	Staphylococcus aureus strain 014S_SA chromosome, complete genome
Staphylococcus aureus	GCF_016894285.1_ASM1689428v1	NZ_CP069800.1	Staphylococcus aureus strain 014S_SA plasmid p1, complete sequence
Staphylococcus aureus	GCF_017088305.1_ASM1708830v1	NZ_CP070986.1	Staphylococcus aureus strain WBG8287 chromosome, complete genome
Staphylococcus aureus	GCF_017088305.1_ASM1708830v1	NZ_CP070987.1	Staphylococcus aureus strain WBG8287 plasmid pWBG750, complete sequence
Staphylococcus aureus	GCF_017088305.1_ASM1708830v1	NZ_CP070988.1	Staphylococcus aureus strain WBG8287 plasmid pWBG751, complete sequence
Staphylococcus aureus	GCF_017088385.1_ASM1708838v1	NZ_CP070983.1	Staphylococcus aureus strain WBG8366 chromosome, complete genome
Staphylococcus aureus	GCF_017088385.1_ASM1708838v1	NZ_CP070984.1	Staphylococcus aureus strain WBG8366 plasmid pWBG763, complete sequence
Staphylococcus aureus	GCF_017088385.1_ASM1708838v1	NZ_CP070985.1	Staphylococcus aureus strain WBG8366 plasmid pWBG764, complete sequence
Staphylococcus aureus	GCF_017161095.1_ASM1716109v1	NZ_CP046476.1	Staphylococcus aureus strain MEI001 chromosome, complete genome
Staphylococcus aureus	GCF_017161095.1_ASM1716109v1	NZ_CP046477.1	Staphylococcus aureus strain MEI001 plasmid pMEI001, complete sequence
Staphylococcus aureus	GCF_017328685.1_ASM1732868v1	NZ_CP071332.1	Staphylococcus aureus strain M534 chromosome
Staphylococcus aureus	GCF_017328705.1_ASM1732870v1	NZ_CP071333.1	Staphylococcus aureus strain M385 chromosome
Staphylococcus aureus	GCF_017328725.1_ASM1732872v1	NZ_CP071334.1	Staphylococcus aureus strain M319 chromosome
Staphylococcus aureus	GCF_017328745.1_ASM1732874v1	NZ_CP071335.1	Staphylococcus aureus strain M313 chromosome
Staphylococcus aureus	GCF_017328765.1_ASM1732876v1	NZ_CP071336.1	Staphylococcus aureus strain M308 chromosome
Staphylococcus aureus	GCF_017328785.1_ASM1732878v1	NZ_CP071337.1	Staphylococcus aureus strain M283 chromosome
Staphylococcus aureus	GCF_017328805.1_ASM1732880v1	NZ_CP071338.1	Staphylococcus aureus strain M222 chromosome
Staphylococcus aureus	GCF_017328825.1_ASM1732882v1	NZ_CP071339.1	Staphylococcus aureus strain M192 chromosome
Staphylococcus aureus	GCF_017328845.1_ASM1732884v1	NZ_CP071340.1	Staphylococcus aureus strain M186 chromosome
Staphylococcus aureus	GCF_017328865.1_ASM1732886v1	NZ_CP071341.1	Staphylococcus aureus strain M160 chromosome
Staphylococcus aureus	GCF_017328885.1_ASM1732888v1	NZ_CP071342.1	Staphylococcus aureus strain M125 chromosome
Staphylococcus aureus	GCF_017328905.1_ASM1732890v1	NZ_CP071343.1	Staphylococcus aureus strain M124 chromosome
Staphylococcus aureus	GCF_017328925.1_ASM1732892v1	NZ_CP071344.1	Staphylococcus aureus strain M117 chromosome
Staphylococcus aureus	GCF_017328945.1_ASM1732894v1	NZ_CP071345.1	Staphylococcus aureus strain M92 chromosome
Staphylococcus aureus	GCF_017328965.1_ASM1732896v1	NZ_CP071346.1	Staphylococcus aureus strain M86 chromosome
Staphylococcus aureus	GCF_017328985.1_ASM1732898v1	NZ_CP071347.1	Staphylococcus aureus strain M37 chromosome
Staphylococcus aureus	GCF_017329005.1_ASM1732900v1	NZ_CP071348.1	Staphylococcus aureus strain M20 chromosome
Staphylococcus aureus	GCF_017329025.1_ASM1732902v1	NZ_CP071349.1	Staphylococcus aureus strain M5 chromosome
Staphylococcus aureus	GCF_017329045.1_ASM1732904v1	NZ_CP071350.1	Staphylococcus aureus strain Laus385 chromosome
Staphylococcus aureus	GCF_017329065.1_ASM1732906v1	NZ_CP071351.1	Staphylococcus aureus strain Laus270 chromosome
Staphylococcus aureus	GCF_017329085.1_ASM1732908v1	NZ_CP071352.1	Staphylococcus aureus strain I37 chromosome
Staphylococcus aureus	GCF_017329105.1_ASM1732910v1	NZ_CP071353.1	Staphylococcus aureus strain I36 chromosome
Staphylococcus aureus	GCF_017329125.1_ASM1732912v1	NZ_CP071354.1	Staphylococcus aureus strain I29 chromosome
Staphylococcus aureus	GCF_017329145.1_ASM1732914v1	NZ_CP071355.1	Staphylococcus aureus strain I2 chromosome
Staphylococcus aureus	GCF_017329165.1_ASM1732916v1	NZ_CP071356.1	Staphylococcus aureus strain M2872 chromosome
Staphylococcus aureus	GCF_017329185.1_ASM1732918v1	NZ_CP071357.1	Staphylococcus aureus strain M2117 chromosome
Staphylococcus aureus	GCF_017329205.1_ASM1732920v1	NZ_CP071358.1	Staphylococcus aureus strain M1172 chromosome
Staphylococcus aureus	GCF_017329225.1_ASM1732922v1	NZ_CP071359.1	Staphylococcus aureus strain M1092 chromosome
Staphylococcus aureus	GCF_017329245.1_ASM1732924v1	NZ_CP071360.1	Staphylococcus aureus strain O103 chromosome
Staphylococcus aureus	GCF_017329265.1_ASM1732926v1	NZ_CP071361.1	Staphylococcus aureus strain O100 chromosome
Staphylococcus aureus	GCF_017329285.1_ASM1732928v1	NZ_CP071362.1	Staphylococcus aureus strain Jn chromosome
Staphylococcus aureus	GCF_017329305.1_ASM1732930v1	NZ_CP071363.1	Staphylococcus aureus strain Je chromosome
Staphylococcus aureus	GCF_017329325.1_ASM1732932v1	NZ_CP071364.1	Staphylococcus aureus strain Jb chromosome
Staphylococcus aureus	GCF_017329345.1_ASM1732934v1	NZ_CP071365.1	Staphylococcus aureus strain G57 chromosome
Staphylococcus aureus	GCF_017329365.1_ASM1732936v1	NZ_CP071366.1	Staphylococcus aureus strain G36 chromosome
Staphylococcus aureus	GCF_017329385.1_ASM1732938v1	NZ_CP071367.1	Staphylococcus aureus strain G34 chromosome
Staphylococcus aureus	GCF_017329405.1_ASM1732940v1	NZ_CP071368.1	Staphylococcus aureus strain G16 chromosome
Staphylococcus aureus	GCF_017329425.1_ASM1732942v1	NZ_CP071369.1	Staphylococcus aureus strain G04 chromosome
Staphylococcus aureus	GCF_017329445.1_ASM1732944v1	NZ_CP071370.1	Staphylococcus aureus strain G03 chromosome
Staphylococcus aureus	GCF_017329465.1_ASM1732946v1	NZ_CP071371.1	Staphylococcus aureus strain G01 chromosome
Staphylococcus aureus	GCF_017329485.1_ASM1732948v1	NZ_CP071372.1	Staphylococcus aureus strain Fu1 chromosome
Staphylococcus aureus	GCF_017329505.1_ASM1732950v1	NZ_CP071373.1	Staphylococcus aureus strain Bk chromosome
Staphylococcus aureus	GCF_017329525.1_ASM1732952v1	NZ_CP071374.1	Staphylococcus aureus strain Bc chromosome
Staphylococcus aureus	GCF_017798245.1_ASM1779824v1	NZ_CP060278.1	Staphylococcus aureus strain KZN chromosome, complete genome
Staphylococcus aureus	GCF_017798245.1_ASM1779824v1	NZ_CP060279.1	Staphylococcus aureus strain KZN plasmid pMRSAKZN, complete sequence
Staphylococcus aureus	GCF_018075265.1_ASM1807526v1	NZ_CP073012.1	Staphylococcus aureus strain SA14+ chromosome, complete genome
Staphylococcus aureus	GCF_018093065.1_ASM1809306v1	NZ_CP070991.1	Staphylococcus aureus strain CBS2016-05 chromosome, complete genome
Staphylococcus aureus	GCF_018093065.1_ASM1809306v1	NZ_CP070992.1	Staphylococcus aureus strain CBS2016-05 plasmid unnamed, complete sequence
Staphylococcus aureus	GCF_018093105.1_ASM1809310v1	NZ_CP071100.1	Staphylococcus aureus strain PS/BAC/169/17/W chromosome, complete genome
Staphylococcus aureus	GCF_018093105.1_ASM1809310v1	NZ_CP071101.1	Staphylococcus aureus strain PS/BAC/169/17/W plasmid unnamed, complete sequence
Staphylococcus aureus	GCF_018093205.1_ASM1809320v1	NZ_CP071102.1	Staphylococcus aureus strain CI/BAC/25/13/W chromosome, complete genome
Staphylococcus aureus	GCF_018093205.1_ASM1809320v1	NZ_CP071103.1	Staphylococcus aureus strain CI/BAC/25/13/W plasmid unnamed, complete sequence
Staphylococcus aureus	GCF_018093225.1_ASM1809322v1	NZ_CP071104.1	Staphylococcus aureus strain PS/BAC/317/16/W chromosome, complete genome
Staphylococcus aureus	GCF_018093225.1_ASM1809322v1	NZ_CP071105.1	Staphylococcus aureus strain PS/BAC/317/16/W plasmid unnamed1, complete sequence
Staphylococcus aureus	GCF_018093225.1_ASM1809322v1	NZ_CP071106.1	Staphylococcus aureus strain PS/BAC/317/16/W plasmid unnamed2, complete sequence
Staphylococcus aureus	GCF_018135565.1_ASM1813556v1	NZ_CP073065.1	Staphylococcus aureus strain 17Gst354 chromosome, complete genome
Staphylococcus aureus	GCF_018135565.1_ASM1813556v1	NZ_CP073064.1	Staphylococcus aureus strain 17Gst354 plasmid unnamed, complete sequence
Staphylococcus aureus	GCF_018141385.1_ASM1814138v1	NZ_CP047646.1	Staphylococcus aureus strain 19/Msa0875 chromosome, complete genome
Staphylococcus aureus	GCF_018336515.1_ASM1833651v1	NZ_CP047922.1	Staphylococcus aureus strain SR231 chromosome, complete genome
Staphylococcus aureus	GCF_018336515.1_ASM1833651v1	NZ_CP047923.1	Staphylococcus aureus strain SR231 plasmid pSR231, complete sequence
Staphylococcus aureus	GCF_018336535.1_ASM1833653v1	NZ_CP047924.1	Staphylococcus aureus strain SR130 chromosome, complete genome
Staphylococcus aureus	GCF_018336535.1_ASM1833653v1	NZ_CP047925.1	Staphylococcus aureus strain SR130 plasmid pSR130, complete sequence
Staphylococcus aureus	GCF_018399115.1_ASM1839911v1	NZ_CP071594.1	Staphylococcus aureus strain PNID0137 chromosome, complete genome
Staphylococcus aureus	GCF_018409145.1_ASM1840914v1	NZ_AP024511.1	Staphylococcus aureus isolate 2007-13 chromosome, complete genome
Staphylococcus aureus	GCF_018409145.1_ASM1840914v1	NZ_AP024512.1	Staphylococcus aureus isolate 2007-13 plasmid pSA13, complete sequence
Staphylococcus aureus	GCF_018502005.1_ASM1850200v1	NZ_CP075506.1	Staphylococcus aureus strain Colony590 chromosome
Staphylococcus aureus	GCF_018502025.1_ASM1850202v1	NZ_CP075507.1	Staphylococcus aureus strain Colony586 chromosome
Staphylococcus aureus	GCF_018502045.1_ASM1850204v1	NZ_CP075513.1	Staphylococcus aureus strain Colony170 chromosome
Staphylococcus aureus	GCF_018502065.1_ASM1850206v1	NZ_CP075514.1	Staphylococcus aureus strain Colony529 chromosome
Staphylococcus aureus	GCF_018502125.1_ASM1850212v1	NZ_CP075508.1	Staphylococcus aureus strain Colony584 chromosome
Staphylococcus aureus	GCF_018502145.1_ASM1850214v1	NZ_CP075510.1	Staphylococcus aureus strain Colony579 chromosome
Staphylococcus aureus	GCF_018502165.1_ASM1850216v1	NZ_CP075511.1	Staphylococcus aureus strain Colony103 chromosome
Staphylococcus aureus	GCF_018502185.1_ASM1850218v1	NZ_CP075512.1	Staphylococcus aureus strain Colony88 chromosome
Staphylococcus aureus	GCF_018502285.1_ASM1850228v1	NZ_CP075515.1	Staphylococcus aureus strain Colony106 isolate Colony106 chromosome
Staphylococcus aureus	GCF_018502365.1_ASM1850236v1	NZ_CP075509.1	Staphylococcus aureus strain Colony583 chromosome
Staphylococcus aureus	GCF_018513625.1_ASM1851362v1	NZ_CP075516.1	Staphylococcus aureus strain Colony3 chromosome
Staphylococcus aureus	GCF_018732165.1_ASM1873216v1	NZ_CP076105.1	Staphylococcus aureus subsp. aureus RN4220 chromosome, complete genome
Staphylococcus aureus	GCF_018968725.1_ASM1896872v1	NZ_CP076660.1	Staphylococcus aureus strain SG511 Berlin chromosome, complete genome
Staphylococcus aureus	GCF_018987325.1_ASM1898732v1	NZ_CP076839.1	Staphylococcus aureus strain 55-100-016 chromosome, complete genome
Staphylococcus aureus	GCF_018987325.1_ASM1898732v1	NZ_CP076840.1	Staphylococcus aureus strain 55-100-016 plasmid unnamed1, complete sequence
Staphylococcus aureus	GCF_018987325.1_ASM1898732v1	NZ_CP076841.1	Staphylococcus aureus strain 55-100-016 plasmid unnamed2, complete sequence
Staphylococcus aureus	GCF_018987325.1_ASM1898732v1	NZ_CP076842.1	Staphylococcus aureus strain 55-100-016 plasmid unnamed3, complete sequence
Staphylococcus aureus	GCF_018987345.1_ASM1898734v1	NZ_CP076843.1	Staphylococcus aureus strain 55-100-003 chromosome, complete genome
Staphylococcus aureus	GCF_018987345.1_ASM1898734v1	NZ_CP076844.1	Staphylococcus aureus strain 55-100-003 plasmid unnamed1, complete sequence
Staphylococcus aureus	GCF_018987345.1_ASM1898734v1	NZ_CP076845.1	Staphylococcus aureus strain 55-100-003 plasmid unnamed2, complete sequence
Staphylococcus aureus	GCF_018987365.1_ASM1898736v1	NZ_CP076823.1	Staphylococcus aureus strain ST59 chromosome, complete genome
Staphylococcus aureus	GCF_019134615.1_ASM1913461v1	NZ_CP077755.1	Staphylococcus aureus strain WHC09 chromosome, complete genome
Staphylococcus aureus	GCF_019134615.1_ASM1913461v1	NZ_CP077756.1	Staphylococcus aureus strain WHC09 plasmid pWHA09, complete sequence
Staphylococcus aureus	GCF_019134635.1_ASM1913463v1	NZ_CP077757.1	Staphylococcus aureus strain WHC07 chromosome, complete genome
Staphylococcus aureus	GCF_019334585.1_ASM1933458v1	NZ_CP079715.1	Staphylococcus aureus strain V8 chromosome, complete genome
Staphylococcus aureus	GCF_019395185.1_ASM1939518v1	NZ_CP080053.1	Staphylococcus aureus strain BSN14R1 chromosome
Staphylococcus aureus	GCF_019395205.1_ASM1939520v1	NZ_CP080054.1	Staphylococcus aureus strain BSN14RB chromosome
Staphylococcus aureus	GCF_019395225.1_ASM1939522v1	NZ_CP080055.1	Staphylococcus aureus strain BSN14S3 chromosome
Staphylococcus aureus	GCF_019550875.1_ASM1955087v1	NZ_CP080551.1	Staphylococcus aureus strain HL18840 chromosome, complete genome
Staphylococcus aureus	GCF_019550945.1_ASM1955094v1	NZ_CP080560.1	Staphylococcus aureus strain HL17064 chromosome, complete genome
Staphylococcus aureus	GCF_019550945.1_ASM1955094v1	NZ_CP080561.1	Staphylococcus aureus strain HL17064 plasmid pHL17064, complete sequence
Staphylococcus aureus	GCF_019551035.1_ASM1955103v1	NZ_CP080550.1	Staphylococcus aureus strain HL18883 chromosome, complete genome
Staphylococcus aureus	GCF_019551095.1_ASM1955109v1	NZ_CP080562.1	Staphylococcus aureus strain HL21008 chromosome, complete genome
Staphylococcus aureus	GCF_019551095.1_ASM1955109v1	NZ_CP080563.1	Staphylococcus aureus strain HL21008 plasmid pHL21008, complete sequence
Staphylococcus aureus	GCF_019551175.1_ASM1955117v1	NZ_CP080556.1	Staphylococcus aureus strain HL17078 chromosome, complete genome
Staphylococcus aureus	GCF_019551175.1_ASM1955117v1	NZ_CP080557.1	Staphylococcus aureus strain HL17078 plasmid pHL17078_1, complete sequence
Staphylococcus aureus	GCF_019551175.1_ASM1955117v1	NZ_CP080558.1	Staphylococcus aureus strain HL17078 plasmid pHL17078_2, complete sequence
Staphylococcus aureus	GCF_019551175.1_ASM1955117v1	NZ_CP080559.1	Staphylococcus aureus strain HL17078 plasmid pHL17078_3, complete sequence
Staphylococcus aureus	GCF_019551235.1_ASM1955123v1	NZ_CP080553.1	Staphylococcus aureus strain HL18380 chromosome, complete genome
Staphylococcus aureus	GCF_019551235.1_ASM1955123v1	NZ_CP080554.1	Staphylococcus aureus strain HL18380 plasmid pHL18380_1, complete sequence
Staphylococcus aureus	GCF_019551235.1_ASM1955123v1	NZ_CP080555.1	Staphylococcus aureus strain HL18380 plasmid pHL18380_2, complete sequence
Staphylococcus aureus	GCF_019551315.1_ASM1955131v1	NZ_CP080552.1	Staphylococcus aureus strain HL18807 chromosome, complete genome
Staphylococcus aureus	GCF_019551355.1_ASM1955135v1	NZ_CP080564.1	Staphylococcus aureus strain HL16278 chromosome, complete genome
Staphylococcus aureus	GCF_019551355.1_ASM1955135v1	NZ_CP080565.1	Staphylococcus aureus strain HL16278 plasmid pHL16278, complete sequence
Staphylococcus aureus	GCF_019551375.1_ASM1955137v1	NZ_CP080548.1	Staphylococcus aureus strain HL18888 chromosome, complete genome
Staphylococcus aureus	GCF_019551375.1_ASM1955137v1	NZ_CP080549.1	Staphylococcus aureus strain HL18888 plasmid pHL18888, complete sequence
Staphylococcus aureus	GCF_019551415.1_ASM1955141v1	NZ_CP080566.1	Staphylococcus aureus strain HL20835 isolate HL20835 chromosome
Staphylococcus aureus	GCF_019551415.1_ASM1955141v1	NZ_CP080567.1	Staphylococcus aureus strain HL20835 isolate HL20835 plasmid pHL20835
Staphylococcus aureus	GCF_019603375.1_ASM1960337v1	NZ_CP080770.1	Staphylococcus aureus strain HL23187 chromosome, complete genome
Staphylococcus aureus	GCF_019603375.1_ASM1960337v1	NZ_CP080771.1	Staphylococcus aureus strain HL23187 plasmid pHL23187, complete sequence
Staphylococcus aureus	GCF_019653615.1_ASM1965361v1	NZ_CP077098.1	Staphylococcus aureus strain RGB-095930 chromosome, complete genome
Staphylococcus aureus	GCF_019669165.1_ASM1966916v1	NZ_AP024311.1	Staphylococcus aureus strain THI2018-120 chromosome, complete genome
Staphylococcus aureus	GCF_019669165.1_ASM1966916v1	NZ_AP024312.1	Staphylococcus aureus strain THI2018-120 plasmid pTHI2018-120, complete sequence
Staphylococcus aureus	GCF_019669245.1_ASM1966924v1	NZ_AP024313.1	Staphylococcus aureus strain N1195 chromosome, complete genome
Staphylococcus aureus	GCF_019669245.1_ASM1966924v1	NZ_AP024314.1	Staphylococcus aureus strain N1195 plasmid pN1195, complete sequence
Staphylococcus aureus	GCF_019669345.1_ASM1966934v1	NZ_AP024315.1	Staphylococcus aureus strain BDH17 chromosome, complete genome
Staphylococcus aureus	GCF_019669345.1_ASM1966934v1	NZ_AP024316.1	Staphylococcus aureus strain BDH17 plasmid pBDH17-1, complete sequence
Staphylococcus aureus	GCF_019669345.1_ASM1966934v1	NZ_AP024317.1	Staphylococcus aureus strain BDH17 plasmid pBDH17-2, complete sequence
Staphylococcus aureus	GCF_019669385.1_ASM1966938v1	NZ_AP024318.1	Staphylococcus aureus strain S36 chromosome, complete genome
Staphylococcus aureus	GCF_019669385.1_ASM1966938v1	NZ_AP024319.1	Staphylococcus aureus strain S36 plasmid pS36, complete sequence
Staphylococcus aureus	GCF_019738975.1_ASM1973897v1	NZ_CP081354.1	Staphylococcus aureus strain SQL1 chromosome, complete genome
Staphylococcus aureus	GCF_019738975.1_ASM1973897v1	NZ_CP081355.1	Staphylococcus aureus strain SQL1 plasmid pla1MRSASQL1, complete sequence
Staphylococcus aureus	GCF_019738975.1_ASM1973897v1	NZ_CP081356.1	Staphylococcus aureus strain SQL1 plasmid pla2MRSASQL1, complete sequence
Staphylococcus aureus	GCF_019915405.1_ASM1991540v1	NZ_CP082813.1	Staphylococcus aureus strain SCAID OTT1-2021 (597/2) chromosome, complete genome
Staphylococcus aureus	GCF_019915405.1_ASM1991540v1	NZ_CP082814.1	Staphylococcus aureus strain SCAID OTT1-2021 (597/2) plasmid unnamed, complete sequence
Staphylococcus aureus	GCF_019915425.1_ASM1991542v1	NZ_CP082815.1	Staphylococcus aureus strain SCAID WND1-2021 (598) chromosome, complete genome
Staphylococcus aureus	GCF_019915585.1_ASM1991558v1	NZ_CP082789.1	Staphylococcus aureus strain HL24830 chromosome, complete genome
Staphylococcus aureus	GCF_019915585.1_ASM1991558v1	NZ_CP082790.1	Staphylococcus aureus strain HL24830 plasmid pHL24830, complete sequence
Staphylococcus aureus	GCF_020003145.1_ASM2000314v1	NZ_CP077738.1	Staphylococcus aureus strain UMCG578 chromosome, complete genome
Staphylococcus aureus	GCF_020003145.1_ASM2000314v1	NZ_CP077739.1	Staphylococcus aureus strain UMCG578 plasmid pUMCG578-01, complete sequence
Staphylococcus aureus	GCF_020003145.1_ASM2000314v1	NZ_CP077740.1	Staphylococcus aureus strain UMCG578 plasmid pUMCG578-02, complete sequence
Staphylococcus aureus	GCF_020003165.1_ASM2000316v1	NZ_CP077741.1	Staphylococcus aureus strain NL1 chromosome, complete genome
Staphylococcus aureus	GCF_020003165.1_ASM2000316v1	NZ_CP077742.1	Staphylococcus aureus strain NL1 plasmid pNL1-01, complete sequence
Staphylococcus aureus	GCF_020003165.1_ASM2000316v1	NZ_CP077743.1	Staphylococcus aureus strain NL1 plasmid pNL1-02, complete sequence
Staphylococcus aureus	GCF_020003165.1_ASM2000316v1	NZ_CP077744.1	Staphylococcus aureus strain NL1 plasmid pNL1-03, complete sequence
Staphylococcus aureus	GCF_020034535.1_ASM2003453v1	NZ_CP083259.1	Staphylococcus aureus strain HL25274 chromosome, complete genome
Staphylococcus aureus	GCF_020034535.1_ASM2003453v1	NZ_CP083260.1	Staphylococcus aureus strain HL25274 plasmid pHL25274_1, complete sequence
Staphylococcus aureus	GCF_020034535.1_ASM2003453v1	NZ_CP083261.1	Staphylococcus aureus strain HL25274 plasmid pHL25274_2, complete sequence
Staphylococcus aureus	GCF_020042725.1_ASM2004272v1	NZ_CP083434.1	Staphylococcus aureus strain DC.RB_015 chromosome, complete genome
Staphylococcus aureus	GCF_020042725.1_ASM2004272v1	NZ_CP083435.1	Staphylococcus aureus strain DC.RB_015 plasmid unnamed1, complete sequence
Staphylococcus aureus	GCF_020097755.1_ASM2009775v1	NZ_CP083671.1	Staphylococcus aureus strain HL25870 chromosome, complete genome
Staphylococcus aureus	GCF_020097755.1_ASM2009775v1	NZ_CP083672.1	Staphylococcus aureus strain HL25870 plasmid pHL25870, complete sequence
Staphylococcus aureus	GCF_020150915.1_ASM2015091v1	NZ_CP083728.1	Staphylococcus aureus strain MR254 chromosome, complete genome
Staphylococcus aureus	GCF_020150915.1_ASM2015091v1	NZ_CP083729.1	Staphylococcus aureus strain MR254 plasmid pMR254-1, complete sequence
Staphylococcus aureus	GCF_020150915.1_ASM2015091v1	NZ_CP083730.1	Staphylococcus aureus strain MR254 plasmid pMR254-2, complete sequence
Staphylococcus aureus	GCF_020167475.1_ASM2016747v1	NZ_JAINYI010000001.1	Staphylococcus aureus strain S.6.20.Sa chromosome, whole genome shotgun sequence
Staphylococcus aureus	GCF_020167475.1_ASM2016747v1	NZ_JAINYI010000010.1	Staphylococcus aureus strain S.6.20.Sa S.6.20.Sa_contig10, whole genome shotgun sequence
Staphylococcus aureus	GCF_020167475.1_ASM2016747v1	NZ_JAINYI010000100.1	Staphylococcus aureus strain S.6.20.Sa S.6.20.Sa_contig100, whole genome shotgun sequence
Staphylococcus aureus	GCF_020167475.1_ASM2016747v1	NZ_JAINYI010000101.1	Staphylococcus aureus strain S.6.20.Sa S.6.20.Sa_contig101, whole genome shotgun sequence
Staphylococcus aureus	GCF_020167475.1_ASM2016747v1	NZ_JAINYI010000102.1	Staphylococcus aureus strain S.6.20.Sa S.6.20.Sa_contig102, whole genome shotgun sequence
Staphylococcus aureus	GCF_020167475.1_ASM2016747v1	NZ_JAINYI010000011.1	Staphylococcus aureus strain S.6.20.Sa S.6.20.Sa_contig11, whole genome shotgun sequence
Staphylococcus aureus	GCF_020167475.1_ASM2016747v1	NZ_JAINYI010000012.1	Staphylococcus aureus strain S.6.20.Sa S.6.20.Sa_contig12, whole genome shotgun sequence
Staphylococcus aureus	GCF_020167475.1_ASM2016747v1	NZ_JAINYI010000013.1	Staphylococcus aureus strain S.6.20.Sa S.6.20.Sa_contig13, whole genome shotgun sequence
Staphylococcus aureus	GCF_020167475.1_ASM2016747v1	NZ_JAINYI010000014.1	Staphylococcus aureus strain S.6.20.Sa S.6.20.Sa_contig14, whole genome shotgun sequence
Staphylococcus aureus	GCF_020167475.1_ASM2016747v1	NZ_JAINYI010000015.1	Staphylococcus aureus strain S.6.20.Sa S.6.20.Sa_contig15, whole genome shotgun sequence
Staphylococcus aureus	GCF_020167475.1_ASM2016747v1	NZ_JAINYI010000016.1	Staphylococcus aureus strain S.6.20.Sa S.6.20.Sa_contig16, whole genome shotgun sequence
Staphylococcus aureus	GCF_020167475.1_ASM2016747v1	NZ_JAINYI010000017.1	Staphylococcus aureus strain S.6.20.Sa S.6.20.Sa_contig17, whole genome shotgun sequence
Staphylococcus aureus	GCF_020167475.1_ASM2016747v1	NZ_JAINYI010000018.1	Staphylococcus aureus strain S.6.20.Sa S.6.20.Sa_contig18, whole genome shotgun sequence
Staphylococcus aureus	GCF_020167475.1_ASM2016747v1	NZ_JAINYI010000019.1	Staphylococcus aureus strain S.6.20.Sa S.6.20.Sa_contig19, whole genome shotgun sequence
Staphylococcus aureus	GCF_020167475.1_ASM2016747v1	NZ_JAINYI010000002.1	Staphylococcus aureus strain S.6.20.Sa S.6.20.Sa_contig2, whole genome shotgun sequence
Staphylococcus aureus	GCF_020167475.1_ASM2016747v1	NZ_JAINYI010000020.1	Staphylococcus aureus strain S.6.20.Sa S.6.20.Sa_contig20, whole genome shotgun sequence
Staphylococcus aureus	GCF_020167475.1_ASM2016747v1	NZ_JAINYI010000021.1	Staphylococcus aureus strain S.6.20.Sa S.6.20.Sa_contig21, whole genome shotgun sequence
Staphylococcus aureus	GCF_020167475.1_ASM2016747v1	NZ_JAINYI010000022.1	Staphylococcus aureus strain S.6.20.Sa S.6.20.Sa_contig22, whole genome shotgun sequence
Staphylococcus aureus	GCF_020167475.1_ASM2016747v1	NZ_JAINYI010000023.1	Staphylococcus aureus strain S.6.20.Sa S.6.20.Sa_contig23, whole genome shotgun sequence
Staphylococcus aureus	GCF_020167475.1_ASM2016747v1	NZ_JAINYI010000024.1	Staphylococcus aureus strain S.6.20.Sa S.6.20.Sa_contig24, whole genome shotgun sequence
Staphylococcus aureus	GCF_020167475.1_ASM2016747v1	NZ_JAINYI010000025.1	Staphylococcus aureus strain S.6.20.Sa S.6.20.Sa_contig25, whole genome shotgun sequence
Staphylococcus aureus	GCF_020167475.1_ASM2016747v1	NZ_JAINYI010000026.1	Staphylococcus aureus strain S.6.20.Sa S.6.20.Sa_contig26, whole genome shotgun sequence
Staphylococcus aureus	GCF_020167475.1_ASM2016747v1	NZ_JAINYI010000027.1	Staphylococcus aureus strain S.6.20.Sa S.6.20.Sa_contig27, whole genome shotgun sequence
Staphylococcus aureus	GCF_020167475.1_ASM2016747v1	NZ_JAINYI010000028.1	Staphylococcus aureus strain S.6.20.Sa S.6.20.Sa_contig28, whole genome shotgun sequence
Staphylococcus aureus	GCF_020167475.1_ASM2016747v1	NZ_JAINYI010000029.1	Staphylococcus aureus strain S.6.20.Sa S.6.20.Sa_contig29, whole genome shotgun sequence
Staphylococcus aureus	GCF_020167475.1_ASM2016747v1	NZ_JAINYI010000003.1	Staphylococcus aureus strain S.6.20.Sa S.6.20.Sa_contig3, whole genome shotgun sequence
Staphylococcus aureus	GCF_020167475.1_ASM2016747v1	NZ_JAINYI010000030.1	Staphylococcus aureus strain S.6.20.Sa S.6.20.Sa_contig30, whole genome shotgun sequence
Staphylococcus aureus	GCF_020167475.1_ASM2016747v1	NZ_JAINYI010000031.1	Staphylococcus aureus strain S.6.20.Sa S.6.20.Sa_contig31, whole genome shotgun sequence
Staphylococcus aureus	GCF_020167475.1_ASM2016747v1	NZ_JAINYI010000032.1	Staphylococcus aureus strain S.6.20.Sa S.6.20.Sa_contig32, whole genome shotgun sequence
Staphylococcus aureus	GCF_020167475.1_ASM2016747v1	NZ_JAINYI010000033.1	Staphylococcus aureus strain S.6.20.Sa S.6.20.Sa_contig33, whole genome shotgun sequence
Staphylococcus aureus	GCF_020167475.1_ASM2016747v1	NZ_JAINYI010000034.1	Staphylococcus aureus strain S.6.20.Sa S.6.20.Sa_contig34, whole genome shotgun sequence
Staphylococcus aureus	GCF_020167475.1_ASM2016747v1	NZ_JAINYI010000035.1	Staphylococcus aureus strain S.6.20.Sa S.6.20.Sa_contig35, whole genome shotgun sequence
Staphylococcus aureus	GCF_020167475.1_ASM2016747v1	NZ_JAINYI010000036.1	Staphylococcus aureus strain S.6.20.Sa S.6.20.Sa_contig36, whole genome shotgun sequence
Staphylococcus aureus	GCF_020167475.1_ASM2016747v1	NZ_JAINYI010000037.1	Staphylococcus aureus strain S.6.20.Sa S.6.20.Sa_contig37, whole genome shotgun sequence
Staphylococcus aureus	GCF_020167475.1_ASM2016747v1	NZ_JAINYI010000038.1	Staphylococcus aureus strain S.6.20.Sa S.6.20.Sa_contig38, whole genome shotgun sequence
Staphylococcus aureus	GCF_020167475.1_ASM2016747v1	NZ_JAINYI010000039.1	Staphylococcus aureus strain S.6.20.Sa S.6.20.Sa_contig39, whole genome shotgun sequence
Staphylococcus aureus	GCF_020167475.1_ASM2016747v1	NZ_JAINYI010000004.1	Staphylococcus aureus strain S.6.20.Sa S.6.20.Sa_contig4, whole genome shotgun sequence
Staphylococcus aureus	GCF_020167475.1_ASM2016747v1	NZ_JAINYI010000040.1	Staphylococcus aureus strain S.6.20.Sa S.6.20.Sa_contig40, whole genome shotgun sequence
Staphylococcus aureus	GCF_020167475.1_ASM2016747v1	NZ_JAINYI010000041.1	Staphylococcus aureus strain S.6.20.Sa S.6.20.Sa_contig41, whole genome shotgun sequence
Staphylococcus aureus	GCF_020167475.1_ASM2016747v1	NZ_JAINYI010000042.1	Staphylococcus aureus strain S.6.20.Sa S.6.20.Sa_contig42, whole genome shotgun sequence
Staphylococcus aureus	GCF_020167475.1_ASM2016747v1	NZ_JAINYI010000043.1	Staphylococcus aureus strain S.6.20.Sa S.6.20.Sa_contig43, whole genome shotgun sequence
Staphylococcus aureus	GCF_020167475.1_ASM2016747v1	NZ_JAINYI010000044.1	Staphylococcus aureus strain S.6.20.Sa S.6.20.Sa_contig44, whole genome shotgun sequence
Staphylococcus aureus	GCF_020167475.1_ASM2016747v1	NZ_JAINYI010000045.1	Staphylococcus aureus strain S.6.20.Sa S.6.20.Sa_contig45, whole genome shotgun sequence
Staphylococcus aureus	GCF_020167475.1_ASM2016747v1	NZ_JAINYI010000046.1	Staphylococcus aureus strain S.6.20.Sa S.6.20.Sa_contig46, whole genome shotgun sequence
Staphylococcus aureus	GCF_020167475.1_ASM2016747v1	NZ_JAINYI010000047.1	Staphylococcus aureus strain S.6.20.Sa S.6.20.Sa_contig47, whole genome shotgun sequence
Staphylococcus aureus	GCF_020167475.1_ASM2016747v1	NZ_JAINYI010000048.1	Staphylococcus aureus strain S.6.20.Sa S.6.20.Sa_contig48, whole genome shotgun sequence
Staphylococcus aureus	GCF_020167475.1_ASM2016747v1	NZ_JAINYI010000049.1	Staphylococcus aureus strain S.6.20.Sa S.6.20.Sa_contig49, whole genome shotgun sequence
Staphylococcus aureus	GCF_020167475.1_ASM2016747v1	NZ_JAINYI010000005.1	Staphylococcus aureus strain S.6.20.Sa S.6.20.Sa_contig5, whole genome shotgun sequence
Staphylococcus aureus	GCF_020167475.1_ASM2016747v1	NZ_JAINYI010000050.1	Staphylococcus aureus strain S.6.20.Sa S.6.20.Sa_contig50, whole genome shotgun sequence
Staphylococcus aureus	GCF_020167475.1_ASM2016747v1	NZ_JAINYI010000051.1	Staphylococcus aureus strain S.6.20.Sa S.6.20.Sa_contig51, whole genome shotgun sequence
Staphylococcus aureus	GCF_020167475.1_ASM2016747v1	NZ_JAINYI010000052.1	Staphylococcus aureus strain S.6.20.Sa S.6.20.Sa_contig52, whole genome shotgun sequence
Staphylococcus aureus	GCF_020167475.1_ASM2016747v1	NZ_JAINYI010000053.1	Staphylococcus aureus strain S.6.20.Sa S.6.20.Sa_contig53, whole genome shotgun sequence
Staphylococcus aureus	GCF_020167475.1_ASM2016747v1	NZ_JAINYI010000054.1	Staphylococcus aureus strain S.6.20.Sa S.6.20.Sa_contig54, whole genome shotgun sequence
Staphylococcus aureus	GCF_020167475.1_ASM2016747v1	NZ_JAINYI010000055.1	Staphylococcus aureus strain S.6.20.Sa S.6.20.Sa_contig55, whole genome shotgun sequence
Staphylococcus aureus	GCF_020167475.1_ASM2016747v1	NZ_JAINYI010000056.1	Staphylococcus aureus strain S.6.20.Sa S.6.20.Sa_contig56, whole genome shotgun sequence
Staphylococcus aureus	GCF_020167475.1_ASM2016747v1	NZ_JAINYI010000057.1	Staphylococcus aureus strain S.6.20.Sa S.6.20.Sa_contig57, whole genome shotgun sequence
Staphylococcus aureus	GCF_020167475.1_ASM2016747v1	NZ_JAINYI010000058.1	Staphylococcus aureus strain S.6.20.Sa S.6.20.Sa_contig58, whole genome shotgun sequence
Staphylococcus aureus	GCF_020167475.1_ASM2016747v1	NZ_JAINYI010000059.1	Staphylococcus aureus strain S.6.20.Sa S.6.20.Sa_contig59, whole genome shotgun sequence
Staphylococcus aureus	GCF_020167475.1_ASM2016747v1	NZ_JAINYI010000006.1	Staphylococcus aureus strain S.6.20.Sa S.6.20.Sa_contig6, whole genome shotgun sequence
Staphylococcus aureus	GCF_020167475.1_ASM2016747v1	NZ_JAINYI010000060.1	Staphylococcus aureus strain S.6.20.Sa S.6.20.Sa_contig60, whole genome shotgun sequence
Staphylococcus aureus	GCF_020167475.1_ASM2016747v1	NZ_JAINYI010000061.1	Staphylococcus aureus strain S.6.20.Sa S.6.20.Sa_contig61, whole genome shotgun sequence
Staphylococcus aureus	GCF_020167475.1_ASM2016747v1	NZ_JAINYI010000062.1	Staphylococcus aureus strain S.6.20.Sa S.6.20.Sa_contig62, whole genome shotgun sequence
Staphylococcus aureus	GCF_020167475.1_ASM2016747v1	NZ_JAINYI010000063.1	Staphylococcus aureus strain S.6.20.Sa S.6.20.Sa_contig63, whole genome shotgun sequence
Staphylococcus aureus	GCF_020167475.1_ASM2016747v1	NZ_JAINYI010000064.1	Staphylococcus aureus strain S.6.20.Sa S.6.20.Sa_contig64, whole genome shotgun sequence
Staphylococcus aureus	GCF_020167475.1_ASM2016747v1	NZ_JAINYI010000065.1	Staphylococcus aureus strain S.6.20.Sa S.6.20.Sa_contig65, whole genome shotgun sequence
Staphylococcus aureus	GCF_020167475.1_ASM2016747v1	NZ_JAINYI010000066.1	Staphylococcus aureus strain S.6.20.Sa S.6.20.Sa_contig66, whole genome shotgun sequence
Staphylococcus aureus	GCF_020167475.1_ASM2016747v1	NZ_JAINYI010000067.1	Staphylococcus aureus strain S.6.20.Sa S.6.20.Sa_contig67, whole genome shotgun sequence
Staphylococcus aureus	GCF_020167475.1_ASM2016747v1	NZ_JAINYI010000068.1	Staphylococcus aureus strain S.6.20.Sa S.6.20.Sa_contig68, whole genome shotgun sequence
Staphylococcus aureus	GCF_020167475.1_ASM2016747v1	NZ_JAINYI010000069.1	Staphylococcus aureus strain S.6.20.Sa S.6.20.Sa_contig69, whole genome shotgun sequence
Staphylococcus aureus	GCF_020167475.1_ASM2016747v1	NZ_JAINYI010000007.1	Staphylococcus aureus strain S.6.20.Sa S.6.20.Sa_contig7, whole genome shotgun sequence
Staphylococcus aureus	GCF_020167475.1_ASM2016747v1	NZ_JAINYI010000070.1	Staphylococcus aureus strain S.6.20.Sa S.6.20.Sa_contig70, whole genome shotgun sequence
Staphylococcus aureus	GCF_020167475.1_ASM2016747v1	NZ_JAINYI010000071.1	Staphylococcus aureus strain S.6.20.Sa S.6.20.Sa_contig71, whole genome shotgun sequence
Staphylococcus aureus	GCF_020167475.1_ASM2016747v1	NZ_JAINYI010000072.1	Staphylococcus aureus strain S.6.20.Sa S.6.20.Sa_contig72, whole genome shotgun sequence
Staphylococcus aureus	GCF_020167475.1_ASM2016747v1	NZ_JAINYI010000073.1	Staphylococcus aureus strain S.6.20.Sa S.6.20.Sa_contig73, whole genome shotgun sequence
Staphylococcus aureus	GCF_020167475.1_ASM2016747v1	NZ_JAINYI010000074.1	Staphylococcus aureus strain S.6.20.Sa S.6.20.Sa_contig74, whole genome shotgun sequence
Staphylococcus aureus	GCF_020167475.1_ASM2016747v1	NZ_JAINYI010000075.1	Staphylococcus aureus strain S.6.20.Sa S.6.20.Sa_contig75, whole genome shotgun sequence
Staphylococcus aureus	GCF_020167475.1_ASM2016747v1	NZ_JAINYI010000076.1	Staphylococcus aureus strain S.6.20.Sa S.6.20.Sa_contig76, whole genome shotgun sequence
Staphylococcus aureus	GCF_020167475.1_ASM2016747v1	NZ_JAINYI010000077.1	Staphylococcus aureus strain S.6.20.Sa S.6.20.Sa_contig77, whole genome shotgun sequence
Staphylococcus aureus	GCF_020167475.1_ASM2016747v1	NZ_JAINYI010000078.1	Staphylococcus aureus strain S.6.20.Sa S.6.20.Sa_contig78, whole genome shotgun sequence
Staphylococcus aureus	GCF_020167475.1_ASM2016747v1	NZ_JAINYI010000079.1	Staphylococcus aureus strain S.6.20.Sa S.6.20.Sa_contig79, whole genome shotgun sequence
Staphylococcus aureus	GCF_020167475.1_ASM2016747v1	NZ_JAINYI010000008.1	Staphylococcus aureus strain S.6.20.Sa S.6.20.Sa_contig8, whole genome shotgun sequence
Staphylococcus aureus	GCF_020167475.1_ASM2016747v1	NZ_JAINYI010000080.1	Staphylococcus aureus strain S.6.20.Sa S.6.20.Sa_contig80, whole genome shotgun sequence
Staphylococcus aureus	GCF_020167475.1_ASM2016747v1	NZ_JAINYI010000081.1	Staphylococcus aureus strain S.6.20.Sa S.6.20.Sa_contig81, whole genome shotgun sequence
Staphylococcus aureus	GCF_020167475.1_ASM2016747v1	NZ_JAINYI010000082.1	Staphylococcus aureus strain S.6.20.Sa S.6.20.Sa_contig82, whole genome shotgun sequence
Staphylococcus aureus	GCF_020167475.1_ASM2016747v1	NZ_JAINYI010000083.1	Staphylococcus aureus strain S.6.20.Sa S.6.20.Sa_contig83, whole genome shotgun sequence
Staphylococcus aureus	GCF_020167475.1_ASM2016747v1	NZ_JAINYI010000084.1	Staphylococcus aureus strain S.6.20.Sa S.6.20.Sa_contig84, whole genome shotgun sequence
Staphylococcus aureus	GCF_020167475.1_ASM2016747v1	NZ_JAINYI010000085.1	Staphylococcus aureus strain S.6.20.Sa S.6.20.Sa_contig85, whole genome shotgun sequence
Staphylococcus aureus	GCF_020167475.1_ASM2016747v1	NZ_JAINYI010000086.1	Staphylococcus aureus strain S.6.20.Sa S.6.20.Sa_contig86, whole genome shotgun sequence
Staphylococcus aureus	GCF_020167475.1_ASM2016747v1	NZ_JAINYI010000087.1	Staphylococcus aureus strain S.6.20.Sa S.6.20.Sa_contig87, whole genome shotgun sequence
Staphylococcus aureus	GCF_020167475.1_ASM2016747v1	NZ_JAINYI010000088.1	Staphylococcus aureus strain S.6.20.Sa S.6.20.Sa_contig88, whole genome shotgun sequence
Staphylococcus aureus	GCF_020167475.1_ASM2016747v1	NZ_JAINYI010000089.1	Staphylococcus aureus strain S.6.20.Sa S.6.20.Sa_contig89, whole genome shotgun sequence
Staphylococcus aureus	GCF_020167475.1_ASM2016747v1	NZ_JAINYI010000009.1	Staphylococcus aureus strain S.6.20.Sa S.6.20.Sa_contig9, whole genome shotgun sequence
Staphylococcus aureus	GCF_020167475.1_ASM2016747v1	NZ_JAINYI010000090.1	Staphylococcus aureus strain S.6.20.Sa S.6.20.Sa_contig90, whole genome shotgun sequence
Staphylococcus aureus	GCF_020167475.1_ASM2016747v1	NZ_JAINYI010000091.1	Staphylococcus aureus strain S.6.20.Sa S.6.20.Sa_contig91, whole genome shotgun sequence
Staphylococcus aureus	GCF_020167475.1_ASM2016747v1	NZ_JAINYI010000092.1	Staphylococcus aureus strain S.6.20.Sa S.6.20.Sa_contig92, whole genome shotgun sequence
Staphylococcus aureus	GCF_020167475.1_ASM2016747v1	NZ_JAINYI010000093.1	Staphylococcus aureus strain S.6.20.Sa S.6.20.Sa_contig93, whole genome shotgun sequence
Staphylococcus aureus	GCF_020167475.1_ASM2016747v1	NZ_JAINYI010000094.1	Staphylococcus aureus strain S.6.20.Sa S.6.20.Sa_contig94, whole genome shotgun sequence
Staphylococcus aureus	GCF_020167475.1_ASM2016747v1	NZ_JAINYI010000095.1	Staphylococcus aureus strain S.6.20.Sa S.6.20.Sa_contig95, whole genome shotgun sequence
Staphylococcus aureus	GCF_020167475.1_ASM2016747v1	NZ_JAINYI010000096.1	Staphylococcus aureus strain S.6.20.Sa S.6.20.Sa_contig96, whole genome shotgun sequence
Staphylococcus aureus	GCF_020167475.1_ASM2016747v1	NZ_JAINYI010000097.1	Staphylococcus aureus strain S.6.20.Sa S.6.20.Sa_contig97, whole genome shotgun sequence
Staphylococcus aureus	GCF_020167475.1_ASM2016747v1	NZ_JAINYI010000098.1	Staphylococcus aureus strain S.6.20.Sa S.6.20.Sa_contig98, whole genome shotgun sequence
Staphylococcus aureus	GCF_020167475.1_ASM2016747v1	NZ_JAINYI010000099.1	Staphylococcus aureus strain S.6.20.Sa S.6.20.Sa_contig99, whole genome shotgun sequence
Staphylococcus aureus	GCF_020386595.1_ASM2038659v1	NZ_CP077852.1	Staphylococcus aureus strain N6 chromosome, complete genome
Staphylococcus aureus	GCF_020388075.1_ASM2038807v1	NZ_CP077853.1	Staphylococcus aureus strain N5 chromosome, complete genome
Staphylococcus aureus	GCF_020388095.1_ASM2038809v1	NZ_CP077854.1	Staphylococcus aureus strain N4 chromosome, complete genome
Staphylococcus aureus	GCF_020388115.1_ASM2038811v1	NZ_CP077855.1	Staphylococcus aureus strain L6 chromosome, complete genome
Staphylococcus aureus	GCF_020388135.1_ASM2038813v1	NZ_CP077856.1	Staphylococcus aureus strain L5 chromosome, complete genome
Staphylococcus aureus	GCF_020388155.1_ASM2038815v1	NZ_CP077857.1	Staphylococcus aureus strain L4 chromosome, complete genome
Staphylococcus aureus	GCF_020388175.1_ASM2038817v1	NZ_CP077858.1	Staphylococcus aureus strain AC6 chromosome, complete genome
Staphylococcus aureus	GCF_020388195.1_ASM2038819v1	NZ_CP077859.1	Staphylococcus aureus strain AC5 chromosome, complete genome
Staphylococcus aureus	GCF_020388215.1_ASM2038821v1	NZ_CP077860.1	Staphylococcus aureus strain AC4 chromosome, complete genome
Staphylococcus aureus	GCF_020388235.1_ASM2038823v1	NZ_CP077861.1	Staphylococcus aureus strain 372 chromosome, complete genome
Staphylococcus aureus	GCF_020388235.1_ASM2038823v1	NZ_CP077862.1	Staphylococcus aureus strain 372 plasmid unnamed
Staphylococcus aureus	GCF_020388255.1_ASM2038825v1	NZ_CP077863.1	Staphylococcus aureus strain 371 chromosome, complete genome
Staphylococcus aureus	GCF_020388255.1_ASM2038825v1	NZ_CP077864.1	Staphylococcus aureus strain 371 plasmid unnamed
Staphylococcus aureus	GCF_020388275.1_ASM2038827v1	NZ_CP077865.1	Staphylococcus aureus strain 370 chromosome, complete genome
Staphylococcus aureus	GCF_020388275.1_ASM2038827v1	NZ_CP077866.1	Staphylococcus aureus strain 370 plasmid unnamed
Staphylococcus aureus	GCF_020388295.1_ASM2038829v1	NZ_CP077867.1	Staphylococcus aureus strain 367 chromosome, complete genome
Staphylococcus aureus	GCF_020388315.1_ASM2038831v1	NZ_CP077868.1	Staphylococcus aureus strain 366 chromosome, complete genome
Staphylococcus aureus	GCF_020388335.1_ASM2038833v1	NZ_CP077869.1	Staphylococcus aureus strain 365 chromosome, complete genome
Staphylococcus aureus	GCF_020388355.1_ASM2038835v1	NZ_CP077870.1	Staphylococcus aureus strain 360 chromosome, complete genome
Staphylococcus aureus	GCF_020388355.1_ASM2038835v1	NZ_CP077871.1	Staphylococcus aureus strain 360 plasmid unnamed
Staphylococcus aureus	GCF_020388395.1_ASM2038839v1	NZ_CP077933.1	Staphylococcus aureus strain 359 chromosome, complete genome
Staphylococcus aureus	GCF_020388395.1_ASM2038839v1	NZ_CP077934.1	Staphylococcus aureus strain 359 plasmid unnamed1, complete sequence
Staphylococcus aureus	GCF_020388395.1_ASM2038839v1	NZ_CP077935.1	Staphylococcus aureus strain 359 plasmid unnamed2, complete sequence
Staphylococcus aureus	GCF_020388555.1_ASM2038855v1	NZ_CP077872.1	Staphylococcus aureus strain 358 chromosome, complete genome
Staphylococcus aureus	GCF_020388555.1_ASM2038855v1	NZ_CP077876.1	Staphylococcus aureus strain 358 plasmid unnamed1, complete sequence
Staphylococcus aureus	GCF_020388555.1_ASM2038855v1	NZ_CP077875.1	Staphylococcus aureus strain 358 plasmid unnamed2, complete sequence
Staphylococcus aureus	GCF_020388555.1_ASM2038855v1	NZ_CP077873.1	Staphylococcus aureus strain 358 plasmid unnamed3
Staphylococcus aureus	GCF_020388555.1_ASM2038855v1	NZ_CP077874.1	Staphylococcus aureus strain 358 plasmid unnamed4
Staphylococcus aureus	GCF_020388655.1_ASM2038865v1	NZ_CP077877.1	Staphylococcus aureus strain 357 chromosome, complete genome
Staphylococcus aureus	GCF_020388655.1_ASM2038865v1	NZ_CP077879.1	Staphylococcus aureus strain 357 plasmid unnamed1, complete sequence
Staphylococcus aureus	GCF_020388655.1_ASM2038865v1	NZ_CP077878.1	Staphylococcus aureus strain 357 plasmid unnamed2, complete sequence
Staphylococcus aureus	GCF_020388675.1_ASM2038867v1	NZ_CP077880.1	Staphylococcus aureus strain 356 chromosome, complete genome
Staphylococcus aureus	GCF_020388675.1_ASM2038867v1	NZ_CP077881.1	Staphylococcus aureus strain 356 plasmid unnamed1, complete sequence
Staphylococcus aureus	GCF_020388675.1_ASM2038867v1	NZ_CP077884.1	Staphylococcus aureus strain 356 plasmid unnamed2
Staphylococcus aureus	GCF_020388675.1_ASM2038867v1	NZ_CP077882.1	Staphylococcus aureus strain 356 plasmid unnamed3
Staphylococcus aureus	GCF_020388675.1_ASM2038867v1	NZ_CP077883.1	Staphylococcus aureus strain 356 plasmid unnamed4, complete sequence
Staphylococcus aureus	GCF_020388695.1_ASM2038869v1	NZ_CP077885.1	Staphylococcus aureus strain 355 chromosome, complete genome
Staphylococcus aureus	GCF_020388695.1_ASM2038869v1	NZ_CP077887.1	Staphylococcus aureus strain 355 plasmid unnamed1, complete sequence
Staphylococcus aureus	GCF_020388695.1_ASM2038869v1	NZ_CP077886.1	Staphylococcus aureus strain 355 plasmid unnamed2
Staphylococcus aureus	GCF_020388715.1_ASM2038871v1	NZ_CP077888.1	Staphylococcus aureus strain 334 chromosome, complete genome
Staphylococcus aureus	GCF_020388735.1_ASM2038873v1	NZ_CP077889.1	Staphylococcus aureus strain 333 chromosome, complete genome
Staphylococcus aureus	GCF_020388735.1_ASM2038873v1	NZ_CP077891.1	Staphylococcus aureus strain 333 plasmid unnamed1
Staphylococcus aureus	GCF_020388735.1_ASM2038873v1	NZ_CP077890.1	Staphylococcus aureus strain 333 plasmid unnamed2
Staphylococcus aureus	GCF_020388735.1_ASM2038873v1	NZ_CP077892.1	Staphylococcus aureus strain 333 plasmid unnamed3
Staphylococcus aureus	GCF_020388765.1_ASM2038876v1	NZ_CP077893.1	Staphylococcus aureus strain 332 chromosome, complete genome
Staphylococcus aureus	GCF_020388785.1_ASM2038878v1	NZ_CP077894.1	Staphylococcus aureus strain 329 chromosome, complete genome
Staphylococcus aureus	GCF_020388785.1_ASM2038878v1	NZ_CP077896.1	Staphylococcus aureus strain 329 plasmid unnamed1, complete sequence
Staphylococcus aureus	GCF_020388785.1_ASM2038878v1	NZ_CP077895.1	Staphylococcus aureus strain 329 plasmid unnamed2
Staphylococcus aureus	GCF_020388805.1_ASM2038880v1	NZ_CP077897.1	Staphylococcus aureus strain 328 chromosome, complete genome
Staphylococcus aureus	GCF_020388825.1_ASM2038882v1	NZ_CP077898.1	Staphylococcus aureus strain 327 chromosome, complete genome
Staphylococcus aureus	GCF_020388845.1_ASM2038884v1	NZ_CP077899.1	Staphylococcus aureus strain 324 chromosome, complete genome
Staphylococcus aureus	GCF_020388845.1_ASM2038884v1	NZ_CP077900.1	Staphylococcus aureus strain 324 plasmid unnamed1
Staphylococcus aureus	GCF_020388845.1_ASM2038884v1	NZ_CP077902.1	Staphylococcus aureus strain 324 plasmid unnamed2
Staphylococcus aureus	GCF_020388845.1_ASM2038884v1	NZ_CP077904.1	Staphylococcus aureus strain 324 plasmid unnamed3
Staphylococcus aureus	GCF_020388845.1_ASM2038884v1	NZ_CP077903.1	Staphylococcus aureus strain 324 plasmid unnamed4
Staphylococcus aureus	GCF_020388845.1_ASM2038884v1	NZ_CP077901.1	Staphylococcus aureus strain 324 plasmid unnamed5
Staphylococcus aureus	GCF_020388845.1_ASM2038884v1	NZ_CP077905.1	Staphylococcus aureus strain 324 plasmid unnamed6
Staphylococcus aureus	GCF_020388865.1_ASM2038886v1	NZ_CP077906.1	Staphylococcus aureus strain 323 chromosome
Staphylococcus aureus	GCF_020388865.1_ASM2038886v1	NZ_CP077907.1	Staphylococcus aureus strain 323 plasmid unnamed, complete sequence
Staphylococcus aureus	GCF_020388885.1_ASM2038888v1	NZ_CP077908.1	Staphylococcus aureus strain 322 chromosome, complete genome
Staphylococcus aureus	GCF_020388885.1_ASM2038888v1	NZ_CP077910.1	Staphylococcus aureus strain 322 plasmid unnamed1, complete sequence
Staphylococcus aureus	GCF_020388885.1_ASM2038888v1	NZ_CP077909.1	Staphylococcus aureus strain 322 plasmid unnamed2
Staphylococcus aureus	GCF_020388905.1_ASM2038890v1	NZ_CP077936.1	Staphylococcus aureus strain 319 chromosome, complete genome
Staphylococcus aureus	GCF_020388905.1_ASM2038890v1	NZ_CP077938.1	Staphylococcus aureus strain 319 plasmid unnamed1, complete sequence
Staphylococcus aureus	GCF_020388905.1_ASM2038890v1	NZ_CP077937.1	Staphylococcus aureus strain 319 plasmid unnamed2
Staphylococcus aureus	GCF_020388925.1_ASM2038892v1	NZ_CP077911.1	Staphylococcus aureus strain 318 chromosome, complete genome
Staphylococcus aureus	GCF_020388925.1_ASM2038892v1	NZ_CP077912.1	Staphylococcus aureus strain 318 plasmid unnamed
Staphylococcus aureus	GCF_020388945.1_ASM2038894v1	NZ_CP077913.1	Staphylococcus aureus strain 317 chromosome
Staphylococcus aureus	GCF_020388945.1_ASM2038894v1	NZ_CP077914.1	Staphylococcus aureus strain 317 plasmid unnamed, complete sequence
Staphylococcus aureus	GCF_020388965.1_ASM2038896v1	NZ_CP077915.1	Staphylococcus aureus strain 282 chromosome, complete genome
Staphylococcus aureus	GCF_020388985.1_ASM2038898v1	NZ_CP077916.1	Staphylococcus aureus strain 281 chromosome, complete genome
Staphylococcus aureus	GCF_020389005.1_ASM2038900v1	NZ_CP077917.1	Staphylococcus aureus strain 280 chromosome, complete genome
Staphylococcus aureus	GCF_020389025.2_ASM2038902v2	NZ_CP077919.1	Staphylococcus aureus strain 278 chromosome, complete genome
Staphylococcus aureus	GCF_020389025.2_ASM2038902v2	NZ_CP077918.1	Staphylococcus aureus strain 278 plasmid unnamed, complete sequence
Staphylococcus aureus	GCF_020389165.1_ASM2038916v1	NZ_CP077920.1	Staphylococcus aureus strain 277 chromosome, complete genome
Staphylococcus aureus	GCF_020389265.1_ASM2038926v1	NZ_CP077921.1	Staphylococcus aureus strain 276 chromosome, complete genome
Staphylococcus aureus	GCF_020389325.1_ASM2038932v1	NZ_CP077922.1	Staphylococcus aureus strain 202 chromosome, complete genome
Staphylococcus aureus	GCF_020389425.1_ASM2038942v1	NZ_CP077923.1	Staphylococcus aureus strain 201 chromosome, complete genome
Staphylococcus aureus	GCF_020389445.1_ASM2038944v1	NZ_CP077924.1	Staphylococcus aureus strain 200 chromosome, complete genome
Staphylococcus aureus	GCF_020389465.1_ASM2038946v1	NZ_CP077939.1	Staphylococcus aureus strain 199 chromosome
Staphylococcus aureus	GCF_020389465.1_ASM2038946v1	NZ_CP077940.1	Staphylococcus aureus strain 199 plasmid unnamed
Staphylococcus aureus	GCF_020389485.1_ASM2038948v1	NZ_CP077925.1	Staphylococcus aureus strain 198 chromosome, complete genome
Staphylococcus aureus	GCF_020389505.1_ASM2038950v1	NZ_CP077926.1	Staphylococcus aureus strain 197 chromosome, complete genome
Staphylococcus aureus	GCF_020389505.1_ASM2038950v1	NZ_CP077927.1	Staphylococcus aureus strain 197 plasmid unnamed
Staphylococcus aureus	GCF_020389525.1_ASM2038952v1	NZ_CP077928.1	Staphylococcus aureus strain 196 chromosome, complete genome
Staphylococcus aureus	GCF_020389525.1_ASM2038952v1	NZ_CP077930.1	Staphylococcus aureus strain 196 plasmid unnamed1, complete sequence
Staphylococcus aureus	GCF_020389525.1_ASM2038952v1	NZ_CP077929.1	Staphylococcus aureus strain 196 plasmid unnamed2
Staphylococcus aureus	GCF_020389545.1_ASM2038954v1	NZ_CP077931.1	Staphylococcus aureus strain 195 chromosome, complete genome
Staphylococcus aureus	GCF_020389565.1_ASM2038956v1	NZ_CP077932.1	Staphylococcus aureus strain 194 chromosome, complete genome
Staphylococcus aureus	GCF_020526105.1_ASM2052610v1	NZ_CP084878.1	Staphylococcus aureus strain GS426 chromosome, complete genome
Staphylococcus aureus	GCF_020881895.1_ASM2088189v1	NZ_CP021178.1	Staphylococcus aureus subsp. aureus ST398 strain 2012-3 chromosome, complete genome
Staphylococcus aureus	GCF_020886635.1_ASM2088663v1	NZ_AP024203.1	Staphylococcus aureus strain SA23-1 chromosome, complete genome
Staphylococcus aureus	GCF_020886635.1_ASM2088663v1	NZ_AP024204.1	Staphylococcus aureus strain SA23-1 plasmid pSA23-1, complete sequence
Staphylococcus aureus	GCF_020887155.1_ASM2088715v1	NZ_AP025176.1	Staphylococcus aureus strain TPS5614 chromosome, complete genome
Staphylococcus aureus	GCF_020887215.1_ASM2088721v1	NZ_AP025177.1	Staphylococcus aureus strain TPS6281 chromosome, complete genome
Staphylococcus aureus	GCF_020887215.1_ASM2088721v1	NZ_AP025178.1	Staphylococcus aureus strain TPS6281 plasmid pTPS6281, complete sequence
Staphylococcus aureus	GCF_020889645.1_ASM2088964v1	NZ_CP084107.1	Staphylococcus aureus strain CC49/ST49-MSSA chromosome, complete genome
Staphylococcus aureus	GCF_020889665.1_ASM2088966v1	NZ_CP084892.1	Staphylococcus aureus strain CC1956/ST4614-MSSA chromosome, complete genome
Staphylococcus aureus	GCF_020985245.1_ASM2098524v1	NZ_CP087593.1	Staphylococcus aureus strain Newman NM-CQ chromosome, complete genome
Staphylococcus aureus	GCF_021172825.1_ASM2117282v1	NZ_CP089156.1	Staphylococcus aureus strain UNC_SaCF35 chromosome, complete genome
Staphylococcus aureus	GCF_021172845.1_ASM2117284v1	NZ_CP089154.1	Staphylococcus aureus strain UNC_SaCF36 chromosome, complete genome
Staphylococcus aureus	GCF_021172845.1_ASM2117284v1	NZ_CP089155.1	Staphylococcus aureus strain UNC_SaCF36 plasmid unnamed, complete sequence
Staphylococcus aureus	GCF_021172865.1_ASM2117286v1	NZ_CP089157.1	Staphylococcus aureus strain UNC_SaCF30 chromosome, complete genome
Staphylococcus aureus	GCF_021172865.1_ASM2117286v1	NZ_CP089158.1	Staphylococcus aureus strain UNC_SaCF30 plasmid unnamed, complete sequence
Staphylococcus aureus	GCF_021172885.1_ASM2117288v1	NZ_CP089159.1	Staphylococcus aureus strain UNC_SaCF18 chromosome, complete genome
Staphylococcus aureus	GCF_021172885.1_ASM2117288v1	NZ_CP089160.1	Staphylococcus aureus strain UNC_SaCF18 plasmid unnamed, complete sequence
Staphylococcus aureus	GCF_021172905.1_ASM2117290v1	NZ_CP089161.1	Staphylococcus aureus strain UNC_SaCF13 chromosome, complete genome
Staphylococcus aureus	GCF_021172925.1_ASM2117292v1	NZ_CP089162.1	Staphylococcus aureus strain UNC_SaCF11 chromosome, complete genome
Staphylococcus aureus	GCF_021172925.1_ASM2117292v1	NZ_CP089163.1	Staphylococcus aureus strain UNC_SaCF11 plasmid unnamed1, complete sequence
Staphylococcus aureus	GCF_021172925.1_ASM2117292v1	NZ_CP089164.1	Staphylococcus aureus strain UNC_SaCF11 plasmid unnamed2, complete sequence
Staphylococcus aureus	GCF_021172945.1_ASM2117294v1	NZ_CP089165.1	Staphylococcus aureus strain UNC_SaCF07 chromosome, complete genome
Staphylococcus aureus	GCF_021172945.1_ASM2117294v1	NZ_CP089166.1	Staphylococcus aureus strain UNC_SaCF07 plasmid unnamed, complete sequence
Staphylococcus aureus	GCF_021249285.1_ASM2124928v1	NZ_CP089586.1	Staphylococcus aureus strain E1185_IV_ST12 chromosome, complete genome
Staphylococcus aureus	GCF_021249285.1_ASM2124928v1	NZ_CP089587.1	Staphylococcus aureus strain E1185_IV_ST12 plasmid pE1185_IV_ST12, complete sequence
Staphylococcus aureus	GCF_021383605.1_ASM2138360v1	NZ_CP076564.1	Staphylococcus aureus strain P50D0 ESCAFLOR chromosome
Staphylococcus aureus	GCF_021383625.1_ASM2138362v1	NZ_CP076565.1	Staphylococcus aureus strain P41D28 ESCAFLOR chromosome
Staphylococcus aureus	GCF_021383645.1_ASM2138364v1	NZ_CP076567.1	Staphylococcus aureus strain P32D28 ESCAFLOR chromosome
Staphylococcus aureus	GCF_021383765.1_ASM2138376v1	NZ_CP076358.1	Staphylococcus aureus strain B-AoC-SA4 chromosome
Staphylococcus aureus	GCF_021383785.1_ASM2138378v1	NZ_CP076359.1	Staphylococcus aureus strain B-AoC-SA3 chromosome
Staphylococcus aureus	GCF_021383805.1_ASM2138380v1	NZ_CP076360.1	Staphylococcus aureus strain B-AoC-SA1 chromosome
Staphylococcus aureus	GCF_021383825.1_ASM2138382v1	NZ_CP076568.1	Staphylococcus aureus strain P5D0 ESCAFLOR chromosome
Staphylococcus aureus	GCF_021390135.1_ASM2139013v1	NZ_CP090001.1	Staphylococcus aureus strain RN6390 chromosome, complete genome
Staphylococcus aureus	GCF_021390135.1_ASM2139013v1	NZ_CP090002.1	Staphylococcus aureus strain RN6390 plasmid unnamed, complete sequence
Staphylococcus aureus	GCF_021460015.1_ASM2146001v1	NZ_CP086121.1	Staphylococcus aureus strain MIN-175 chromosome
Staphylococcus aureus	GCF_021491695.1_ASM2149169v1	NZ_CP090872.1	Staphylococcus aureus strain SAUR_BFS17 chromosome
Staphylococcus aureus	GCF_021491715.1_ASM2149171v1	NZ_CP090870.1	Staphylococcus aureus strain SAUR_BFS62 chromosome, complete genome
Staphylococcus aureus	GCF_021491735.1_ASM2149173v1	NZ_CP090873.1	Staphylococcus aureus strain SAUR_BFS16 chromosome, complete genome
Staphylococcus aureus	GCF_021491755.1_ASM2149175v1	NZ_CP090880.1	Staphylococcus aureus strain SAUR_BFS1 chromosome
Staphylococcus aureus	GCF_021491775.1_ASM2149177v1	NZ_CP090879.1	Staphylococcus aureus strain SAUR_BFS2 chromosome, complete genome
Staphylococcus aureus	GCF_021491795.1_ASM2149179v1	NZ_CP090874.1	Staphylococcus aureus strain SAUR_BFS14 chromosome
Staphylococcus aureus	GCF_021491815.1_ASM2149181v1	NZ_CP090875.1	Staphylococcus aureus strain SAUR_BFS13 chromosome
Staphylococcus aureus	GCF_021491835.1_ASM2149183v1	NZ_CP090877.1	Staphylococcus aureus strain SAUR_BFS11 chromosome, complete genome
Staphylococcus aureus	GCF_021491855.1_ASM2149185v1	NZ_CP090878.1	Staphylococcus aureus strain SAUR_BFS4 chromosome
Staphylococcus aureus	GCF_021491875.1_ASM2149187v1	NZ_CP090871.1	Staphylococcus aureus strain SAUR_BFS21 chromosome
Staphylococcus aureus	GCF_021491895.1_ASM2149189v1	NZ_CP090876.1	Staphylococcus aureus strain SAUR_BFS12 chromosome, complete genome
Staphylococcus aureus	GCF_021513355.1_ASM2151335v1	NZ_CP068682.1	Staphylococcus aureus strain NCCP11854 chromosome, complete genome
Staphylococcus aureus	GCF_021513355.1_ASM2151335v1	NZ_CP068683.1	Staphylococcus aureus strain NCCP11854 plasmid unnamed, complete sequence
Staphylococcus aureus	GCF_021725475.1_ASM2172547v1	NZ_CP091412.1	Staphylococcus aureus strain ATR-20003 chromosome, complete genome
Staphylococcus aureus	GCF_021725475.1_ASM2172547v1	NZ_CP091413.1	Staphylococcus aureus strain ATR-20003 plasmid unnamed1, complete sequence
Staphylococcus aureus	GCF_021725475.1_ASM2172547v1	NZ_CP091414.1	Staphylococcus aureus strain ATR-20003 plasmid unnamed2, complete sequence
Staphylococcus aureus	GCF_021869805.1_ASM2186980v1	NZ_CP086215.1	Staphylococcus aureus strain Patient 14, Isolate 02 chromosome, complete genome
Staphylococcus aureus	GCF_022163365.1_ASM2216336v1	NZ_CP091875.1	Staphylococcus aureus strain MN8 chromosome, complete genome
Staphylococcus aureus	GCF_022163485.1_ASM2216348v1	NZ_CP091876.1	Staphylococcus aureus strain FRI-1169 chromosome, complete genome
Staphylococcus aureus	GCF_022163485.1_ASM2216348v1	NZ_CP091877.1	Staphylococcus aureus strain FRI-1169 plasmid pFRI1169, complete sequence
Staphylococcus aureus	GCF_022221525.1_ASM2222152v1	NZ_CP080222.1	Staphylococcus aureus strain NT_8 chromosome, complete genome
Staphylococcus aureus	GCF_022221545.1_ASM2222154v1	NZ_CP080249.1	Staphylococcus aureus strain NV_1 chromosome, complete genome
Staphylococcus aureus	GCF_022221545.1_ASM2222154v1	NZ_CP080250.1	Staphylococcus aureus strain NV_1 plasmid pNV_1, complete sequence
Staphylococcus aureus	GCF_022221565.1_ASM2222156v1	NZ_CP080251.1	Staphylococcus aureus strain NT_611 chromosome, complete genome
Staphylococcus aureus	GCF_022221565.1_ASM2222156v1	NZ_CP080252.1	Staphylococcus aureus strain NT_611 plasmid pLDNT_611, complete sequence
Staphylococcus aureus	GCF_022226975.1_ASM2222697v1	NZ_CP092055.1	Staphylococcus aureus strain USA600 chromosome, complete genome
Staphylococcus aureus	GCF_022226995.1_ASM2222699v1	NZ_CP092052.1	Staphylococcus aureus strain USA300 chromosome, complete genome
Staphylococcus aureus	GCF_022226995.1_ASM2222699v1	NZ_CP092053.1	Staphylococcus aureus strain USA300 plasmid pAH5667_1, complete sequence
Staphylococcus aureus	GCF_022226995.1_ASM2222699v1	NZ_CP092054.1	Staphylococcus aureus strain USA300 plasmid pAH5667_2, complete sequence
Staphylococcus aureus	GCF_022369535.1_ASM2236953v1	NZ_CP062312.1	Staphylococcus aureus strain NAS_OP_163 chromosome, complete genome
Staphylococcus aureus	GCF_022369535.1_ASM2236953v1	NZ_CP062313.1	Staphylococcus aureus strain NAS_OP_163 plasmid unnamed, complete sequence
Staphylococcus aureus	GCF_022369595.1_ASM2236959v1	NZ_CP062314.1	Staphylococcus aureus strain NAS_OP_133 chromosome, complete genome
Staphylococcus aureus	GCF_022369595.1_ASM2236959v1	NZ_CP062315.1	Staphylococcus aureus strain NAS_OP_133 plasmid unnamed1, complete sequence
Staphylococcus aureus	GCF_022369595.1_ASM2236959v1	NZ_CP062316.1	Staphylococcus aureus strain NAS_OP_133 plasmid unnamed2, complete sequence
Staphylococcus aureus	GCF_022369595.1_ASM2236959v1	NZ_CP062317.1	Staphylococcus aureus strain NAS_OP_133 plasmid unnamed3, complete sequence
Staphylococcus aureus	GCF_022369695.1_ASM2236969v1	NZ_CP062318.1	Staphylococcus aureus strain NAS_OP_132 chromosome, complete genome
Staphylococcus aureus	GCF_022369695.1_ASM2236969v1	NZ_CP062319.1	Staphylococcus aureus strain NAS_OP_132 plasmid unnamed, complete sequence
Staphylococcus aureus	GCF_022385275.1_ASM2238527v1	NZ_CP092447.1	Staphylococcus aureus strain SYN chromosome, complete genome
Staphylococcus aureus	GCF_022385275.1_ASM2238527v1	NZ_CP092448.1	Staphylococcus aureus strain SYN plasmid unnamed, complete sequence
Staphylococcus aureus	GCF_022404575.1_ASM2240457v1	NZ_CP062320.1	Staphylococcus aureus strain NAS_OP_101 chromosome, complete genome
Staphylococcus aureus	GCF_022404575.1_ASM2240457v1	NZ_CP062321.1	Staphylococcus aureus strain NAS_OP_101 plasmid unnamed, complete sequence
Staphylococcus aureus	GCF_022404595.1_ASM2240459v1	NZ_CP062322.1	Staphylococcus aureus strain NAS_OP_071 chromosome, complete genome
Staphylococcus aureus	GCF_022404595.1_ASM2240459v1	NZ_CP062323.1	Staphylococcus aureus strain NAS_OP_071 plasmid unnamed, complete sequence
Staphylococcus aureus	GCF_022404615.1_ASM2240461v1	NZ_CP062324.1	Staphylococcus aureus strain NAS_OP_063 chromosome, complete genome
Staphylococcus aureus	GCF_022404615.1_ASM2240461v1	NZ_CP062325.1	Staphylococcus aureus strain NAS_OP_063 plasmid unnamed, complete sequence
Staphylococcus aureus	GCF_022404635.1_ASM2240463v1	NZ_CP062326.1	Staphylococcus aureus strain NAS_OP_043 chromosome, complete genome
Staphylococcus aureus	GCF_022404635.1_ASM2240463v1	NZ_CP062327.1	Staphylococcus aureus strain NAS_OP_043 plasmid unnamed1, complete sequence
Staphylococcus aureus	GCF_022404635.1_ASM2240463v1	NZ_CP062328.1	Staphylococcus aureus strain NAS_OP_043 plasmid unnamed2, complete sequence
Staphylococcus aureus	GCF_022404655.1_ASM2240465v1	NZ_CP062329.1	Staphylococcus aureus strain NAS_OP_026 chromosome, complete genome
Staphylococcus aureus	GCF_022404655.1_ASM2240465v1	NZ_CP062330.1	Staphylococcus aureus strain NAS_OP_026 plasmid pKH18, complete sequence
Staphylococcus aureus	GCF_022404675.1_ASM2240467v1	NZ_CP062331.1	Staphylococcus aureus strain NAS_OP_017 chromosome, complete genome
Staphylococcus aureus	GCF_022404675.1_ASM2240467v1	NZ_CP062332.1	Staphylococcus aureus strain NAS_OP_017 plasmid unnamed1, complete sequence
Staphylococcus aureus	GCF_022404675.1_ASM2240467v1	NZ_CP062333.1	Staphylococcus aureus strain NAS_OP_017 plasmid unnamed2, complete sequence
Staphylococcus aureus	GCF_022404695.1_ASM2240469v1	NZ_CP062334.1	Staphylococcus aureus strain NAS_NP_164 chromosome, complete genome
Staphylococcus aureus	GCF_022404695.1_ASM2240469v1	NZ_CP062335.1	Staphylococcus aureus strain NAS_NP_164 plasmid unnamed, complete sequence
Staphylococcus aureus	GCF_022404715.1_ASM2240471v1	NZ_CP062336.1	Staphylococcus aureus strain NAS_NP_161 chromosome, complete genome
Staphylococcus aureus	GCF_022404715.1_ASM2240471v1	NZ_CP062337.1	Staphylococcus aureus strain NAS_NP_161 plasmid unnamed, complete sequence
Staphylococcus aureus	GCF_022404735.1_ASM2240473v1	NZ_CP062338.1	Staphylococcus aureus strain NAS_NP_103 chromosome, complete genome
Staphylococcus aureus	GCF_022404735.1_ASM2240473v1	NZ_CP062339.1	Staphylococcus aureus strain NAS_NP_103 plasmid unnamed, complete sequence
Staphylococcus aureus	GCF_022404755.1_ASM2240475v1	NZ_CP062340.1	Staphylococcus aureus strain NAS_AN_275 chromosome, complete genome
Staphylococcus aureus	GCF_022404755.1_ASM2240475v1	NZ_CP062341.1	Staphylococcus aureus strain NAS_AN_275 plasmid unnamed, complete sequence
Staphylococcus aureus	GCF_022404775.1_ASM2240477v1	NZ_CP062342.1	Staphylococcus aureus strain NAS_AN_270 chromosome, complete genome
Staphylococcus aureus	GCF_022404775.1_ASM2240477v1	NZ_CP062343.1	Staphylococcus aureus strain NAS_AN_270 plasmid unnamed, complete sequence
Staphylococcus aureus	GCF_022405055.1_ASM2240505v1	NZ_CP062344.1	Staphylococcus aureus strain NAS_AN_265 chromosome, complete genome
Staphylococcus aureus	GCF_022405055.1_ASM2240505v1	NZ_CP062345.1	Staphylococcus aureus strain NAS_AN_265 plasmid unnamed, complete sequence
Staphylococcus aureus	GCF_022405075.1_ASM2240507v1	NZ_CP062346.1	Staphylococcus aureus strain NAS_AN_261 chromosome, complete genome
Staphylococcus aureus	GCF_022405075.1_ASM2240507v1	NZ_CP062347.1	Staphylococcus aureus strain NAS_AN_261 plasmid unnamed, complete sequence
Staphylococcus aureus	GCF_022405145.1_ASM2240514v1	NZ_CP062348.1	Staphylococcus aureus strain NAS_AN_260 chromosome, complete genome
Staphylococcus aureus	GCF_022405145.1_ASM2240514v1	NZ_CP062349.1	Staphylococcus aureus strain NAS_AN_260 plasmid unnamed, complete sequence
Staphylococcus aureus	GCF_022405185.1_ASM2240518v1	NZ_CP062350.1	Staphylococcus aureus strain NAS_AN_250 chromosome, complete genome
Staphylococcus aureus	GCF_022405185.1_ASM2240518v1	NZ_CP062351.1	Staphylococcus aureus strain NAS_AN_250 plasmid unnamed, complete sequence
Staphylococcus aureus	GCF_022405205.1_ASM2240520v1	NZ_CP062352.1	Staphylococcus aureus strain NAS_AN_233 chromosome, complete genome
Staphylococcus aureus	GCF_022405205.1_ASM2240520v1	NZ_CP062353.1	Staphylococcus aureus strain NAS_AN_233 plasmid unnamed, complete sequence
Staphylococcus aureus	GCF_022405235.1_ASM2240523v1	NZ_CP062354.1	Staphylococcus aureus strain NAS_AN_206 chromosome, complete genome
Staphylococcus aureus	GCF_022405235.1_ASM2240523v1	NZ_CP062355.1	Staphylococcus aureus strain NAS_AN_206 plasmid unnamed, complete sequence
Staphylococcus aureus	GCF_022405255.1_ASM2240525v1	NZ_CP062356.1	Staphylococcus aureus strain NAS_AN_203 chromosome, complete genome
Staphylococcus aureus	GCF_022405255.1_ASM2240525v1	NZ_CP062357.1	Staphylococcus aureus strain NAS_AN_203 plasmid unnamed, complete sequence
Staphylococcus aureus	GCF_022405275.1_ASM2240527v1	NZ_CP062358.1	Staphylococcus aureus strain NAS_AN_184 chromosome, complete genome
Staphylococcus aureus	GCF_022405275.1_ASM2240527v1	NZ_CP062359.1	Staphylococcus aureus strain NAS_AN_184 plasmid pSaD592, complete sequence
Staphylococcus aureus	GCF_022405295.1_ASM2240529v1	NZ_CP062360.1	Staphylococcus aureus strain NAS_AN_157 chromosome, complete genome
Staphylococcus aureus	GCF_022405295.1_ASM2240529v1	NZ_CP062361.1	Staphylococcus aureus strain NAS_AN_157 plasmid unnamed
Staphylococcus aureus	GCF_022405315.1_ASM2240531v1	NZ_CP062362.1	Staphylococcus aureus strain NAS_AN_152 chromosome, complete genome
Staphylococcus aureus	GCF_022405315.1_ASM2240531v1	NZ_CP062363.1	Staphylococcus aureus strain NAS_AN_152 plasmid pJRA307-1, complete sequence
Staphylococcus aureus	GCF_022405335.1_ASM2240533v1	NZ_CP062364.1	Staphylococcus aureus strain NAS_AN_130 chromosome, complete genome
Staphylococcus aureus	GCF_022405335.1_ASM2240533v1	NZ_CP062365.1	Staphylococcus aureus strain NAS_AN_130 plasmid unnamed, complete sequence
Staphylococcus aureus	GCF_022405355.1_ASM2240535v1	NZ_CP062366.1	Staphylococcus aureus strain NAS_AN_123 chromosome, complete genome
Staphylococcus aureus	GCF_022405355.1_ASM2240535v1	NZ_CP062367.1	Staphylococcus aureus strain NAS_AN_123 plasmid pSAP046A, complete sequence
Staphylococcus aureus	GCF_022405375.1_ASM2240537v1	NZ_CP062368.1	Staphylococcus aureus strain NAS_AN_115 chromosome, complete genome
Staphylococcus aureus	GCF_022405375.1_ASM2240537v1	NZ_CP062369.1	Staphylococcus aureus strain NAS_AN_115 plasmid unnamed, complete sequence
Staphylococcus aureus	GCF_022405395.1_ASM2240539v1	NZ_CP062370.1	Staphylococcus aureus strain NAS_AN_111 chromosome, complete genome
Staphylococcus aureus	GCF_022405395.1_ASM2240539v1	NZ_CP062371.1	Staphylococcus aureus strain NAS_AN_111 plasmid unnamed, complete sequence
Staphylococcus aureus	GCF_022405415.1_ASM2240541v1	NZ_CP062372.1	Staphylococcus aureus strain NAS_AN_109 chromosome, complete genome
Staphylococcus aureus	GCF_022405415.1_ASM2240541v1	NZ_CP062373.1	Staphylococcus aureus strain NAS_AN_109 plasmid unnamed1, complete sequence
Staphylococcus aureus	GCF_022405415.1_ASM2240541v1	NZ_CP062374.1	Staphylococcus aureus strain NAS_AN_109 plasmid unnamed2, complete sequence
Staphylococcus aureus	GCF_022405415.1_ASM2240541v1	NZ_CP062375.1	Staphylococcus aureus strain NAS_AN_109 plasmid unnamed3, complete sequence
Staphylococcus aureus	GCF_022405435.1_ASM2240543v1	NZ_CP062376.1	Staphylococcus aureus strain NAS_AN_099 chromosome, complete genome
Staphylococcus aureus	GCF_022405435.1_ASM2240543v1	NZ_CP062377.1	Staphylococcus aureus strain NAS_AN_099 plasmid unnamed, complete sequence
Staphylococcus aureus	GCF_022405455.1_ASM2240545v1	NZ_CP062378.1	Staphylococcus aureus strain NAS_AN_079 chromosome, complete genome
Staphylococcus aureus	GCF_022405455.1_ASM2240545v1	NZ_CP062379.1	Staphylococcus aureus strain NAS_AN_079 plasmid pSaD592, complete sequence
Staphylococcus aureus	GCF_022405475.1_ASM2240547v1	NZ_CP062380.1	Staphylococcus aureus strain NAS_AN_076 chromosome, complete genome
Staphylococcus aureus	GCF_022405475.1_ASM2240547v1	NZ_CP062381.1	Staphylococcus aureus strain NAS_AN_076 plasmid pPS00085.1A.1, complete sequence
Staphylococcus aureus	GCF_022405495.1_ASM2240549v1	NZ_CP062382.1	Staphylococcus aureus strain NAS_AN_068 chromosome, complete genome
Staphylococcus aureus	GCF_022405495.1_ASM2240549v1	NZ_CP062383.1	Staphylococcus aureus strain NAS_AN_068 plasmid unnamed, complete sequence
Staphylococcus aureus	GCF_022405515.1_ASM2240551v1	NZ_CP062384.1	Staphylococcus aureus strain NAS_AN_050 chromosome, complete genome
Staphylococcus aureus	GCF_022405515.1_ASM2240551v1	NZ_CP062385.1	Staphylococcus aureus strain NAS_AN_050 plasmid unnamed, complete sequence
Staphylococcus aureus	GCF_022405535.1_ASM2240553v1	NZ_CP062386.1	Staphylococcus aureus strain NAS_AN_047 chromosome, complete genome
Staphylococcus aureus	GCF_022405535.1_ASM2240553v1	NZ_CP062387.1	Staphylococcus aureus strain NAS_AN_047 plasmid unnamed
Staphylococcus aureus	GCF_022405555.1_ASM2240555v1	NZ_CP062388.1	Staphylococcus aureus strain NAS_AN_044 chromosome, complete genome
Staphylococcus aureus	GCF_022405555.1_ASM2240555v1	NZ_CP062389.1	Staphylococcus aureus strain NAS_AN_044 plasmid pSaD592, complete sequence
Staphylococcus aureus	GCF_022405575.1_ASM2240557v1	NZ_CP062390.1	Staphylococcus aureus strain NAS_AN_036 chromosome, complete genome
Staphylococcus aureus	GCF_022405575.1_ASM2240557v1	NZ_CP062391.1	Staphylococcus aureus strain NAS_AN_036 plasmid pSaBSN9S, complete sequence
Staphylococcus aureus	GCF_022405575.1_ASM2240557v1	NZ_CP062392.1	Staphylococcus aureus strain NAS_AN_036 plasmid pFORC_090.1, complete sequence
Staphylococcus aureus	GCF_022405595.1_ASM2240559v1	NZ_CP062393.1	Staphylococcus aureus strain NAS_AN_009 chromosome, complete genome
Staphylococcus aureus	GCF_022405595.1_ASM2240559v1	NZ_CP062394.1	Staphylococcus aureus strain NAS_AN_009 plasmid pLUH02, complete sequence
Staphylococcus aureus	GCF_022405615.1_ASM2240561v1	NZ_CP062395.1	Staphylococcus aureus strain NAS_AN_005 chromosome, complete genome
Staphylococcus aureus	GCF_022405615.1_ASM2240561v1	NZ_CP062396.1	Staphylococcus aureus strain NAS_AN_005 plasmid unnamed1, complete sequence
Staphylococcus aureus	GCF_022405615.1_ASM2240561v1	NZ_CP062397.1	Staphylococcus aureus strain NAS_AN_005 plasmid unnamed2, complete sequence
Staphylococcus aureus	GCF_022405655.1_ASM2240565v1	NZ_CP062398.1	Staphylococcus aureus strain NAS_OP_154 chromosome, complete genome
Staphylococcus aureus	GCF_022405675.1_ASM2240567v1	NZ_CP062399.1	Staphylococcus aureus strain NAS_OP_143 chromosome, complete genome
Staphylococcus aureus	GCF_022405735.1_ASM2240573v1	NZ_CP062400.1	Staphylococcus aureus strain NAS_OP_107 chromosome, complete genome
Staphylococcus aureus	GCF_022405755.1_ASM2240575v1	NZ_CP062401.1	Staphylococcus aureus strain NAS_OP_098 chromosome, complete genome
Staphylococcus aureus	GCF_022405775.1_ASM2240577v1	NZ_CP062402.1	Staphylococcus aureus strain NAS_OP_056 chromosome, complete genome
Staphylococcus aureus	GCF_022405795.1_ASM2240579v1	NZ_CP062403.1	Staphylococcus aureus strain NAS_OP_052 chromosome, complete genome
Staphylococcus aureus	GCF_022405815.1_ASM2240581v1	NZ_CP062404.1	Staphylococcus aureus strain NAS_NP_229 chromosome, complete genome
Staphylococcus aureus	GCF_022405835.1_ASM2240583v1	NZ_CP062405.1	Staphylococcus aureus strain NAS_NP_209 chromosome, complete genome
Staphylococcus aureus	GCF_022405855.1_ASM2240585v1	NZ_CP062406.1	Staphylococcus aureus strain NAS_NP_198 chromosome, complete genome
Staphylococcus aureus	GCF_022405875.1_ASM2240587v1	NZ_CP062407.1	Staphylococcus aureus strain NAS_NP_181 chromosome, complete genome
Staphylococcus aureus	GCF_022405895.1_ASM2240589v1	NZ_CP062408.1	Staphylococcus aureus strain NAS_AN_247 chromosome, complete genome
Staphylococcus aureus	GCF_022405915.1_ASM2240591v1	NZ_CP062409.1	Staphylococcus aureus strain NAS_AN_239 chromosome, complete genome
Staphylococcus aureus	GCF_022405935.1_ASM2240593v1	NZ_CP062410.1	Staphylococcus aureus strain NAS_AN_205 chromosome, complete genome
Staphylococcus aureus	GCF_022405955.1_ASM2240595v1	NZ_CP062411.1	Staphylococcus aureus strain NAS_AN_204 chromosome, complete genome
Staphylococcus aureus	GCF_022405975.1_ASM2240597v1	NZ_CP062412.1	Staphylococcus aureus strain NAS_AN_181 chromosome, complete genome
Staphylococcus aureus	GCF_022405995.1_ASM2240599v1	NZ_CP062413.1	Staphylococcus aureus strain NAS_AN_176 chromosome, complete genome
Staphylococcus aureus	GCF_022406015.1_ASM2240601v1	NZ_CP062414.1	Staphylococcus aureus strain NAS_AN_175 chromosome, complete genome
Staphylococcus aureus	GCF_022406035.1_ASM2240603v1	NZ_CP062415.1	Staphylococcus aureus strain NAS_AN_150 chromosome, complete genome
Staphylococcus aureus	GCF_022406055.1_ASM2240605v1	NZ_CP062416.1	Staphylococcus aureus strain NAS_AN_149 chromosome, complete genome
Staphylococcus aureus	GCF_022406075.1_ASM2240607v1	NZ_CP062417.1	Staphylococcus aureus strain NAS_AN_143 chromosome, complete genome
Staphylococcus aureus	GCF_022406125.1_ASM2240612v1	NZ_CP062418.1	Staphylococcus aureus strain NAS_AN_136 chromosome, complete genome
Staphylococcus aureus	GCF_022406315.1_ASM2240631v1	NZ_CP062419.1	Staphylococcus aureus strain NAS_AN_023 chromosome, complete genome
Staphylococcus aureus	GCF_022406435.1_ASM2240643v1	NZ_CP062420.1	Staphylococcus aureus strain NAS_AN_016 chromosome, complete genome
Staphylococcus aureus	GCF_022406555.1_ASM2240655v1	NZ_CP062421.1	Staphylococcus aureus strain NAS_AN_003 chromosome, complete genome
Staphylococcus aureus	GCF_022406675.1_ASM2240667v1	NZ_CP060141.1	Staphylococcus aureus strain 2868B2 chromosome, complete genome
Staphylococcus aureus	GCF_022406675.1_ASM2240667v1	NZ_CP060142.1	Staphylococcus aureus strain 2868B2 plasmid p2868B2, complete sequence
Staphylococcus aureus	GCF_022406795.1_ASM2240679v1	NZ_CP063745.1	Staphylococcus aureus strain NAS_AN_212 chromosome, complete genome
Staphylococcus aureus	GCF_022493095.1_ASM2249309v1	NZ_CP062439.1	Staphylococcus aureus strain NAS_AN_285 chromosome, complete genome
Staphylococcus aureus	GCF_022493095.1_ASM2249309v1	NZ_CP062440.1	Staphylococcus aureus strain NAS_AN_285 plasmid unnamed, complete sequence
Staphylococcus aureus	GCF_022494545.1_ASM2249454v1	NZ_CP088157.1	Staphylococcus aureus strain 199 chromosome, complete genome
Staphylococcus aureus	GCF_022494565.1_ASM2249456v1	NZ_CP088158.1	Staphylococcus aureus strain 697 chromosome, complete genome
Staphylococcus aureus	GCF_022532145.1_ASM2253214v1	NZ_CP092825.1	Staphylococcus aureus strain GY8 chromosome, complete genome
Staphylococcus aureus	GCF_022532145.1_ASM2253214v1	NZ_CP092826.1	Staphylococcus aureus strain GY8 plasmid p1, complete sequence
Staphylococcus aureus	GCF_022682325.1_ASM2268232v1	NZ_CP093527.1	Staphylococcus aureus strain 697R chromosome, complete genome
Staphylococcus aureus	GCF_022691325.1_ASM2269132v1	NZ_CP092556.1	Staphylococcus aureus strain VMRSA-WC062 chromosome, complete genome
Staphylococcus aureus	GCF_022691325.1_ASM2269132v1	NZ_CP092557.1	Staphylococcus aureus strain VMRSA-WC062 plasmid unnamed, complete sequence
Staphylococcus aureus	GCF_022691345.1_ASM2269134v1	NZ_CP092558.1	Staphylococcus aureus strain VMRSA-WC052 chromosome, complete genome
Staphylococcus aureus	GCF_022691345.1_ASM2269134v1	NZ_CP092559.1	Staphylococcus aureus strain VMRSA-WC052 plasmid unnamed1, complete sequence
Staphylococcus aureus	GCF_022691345.1_ASM2269134v1	NZ_CP092560.1	Staphylococcus aureus strain VMRSA-WC052 plasmid unnamed2, complete sequence
Staphylococcus aureus	GCF_022691365.1_ASM2269136v1	NZ_CP092561.1	Staphylococcus aureus strain MRSA-WC101 chromosome, complete genome
Staphylococcus aureus	GCF_022691365.1_ASM2269136v1	NZ_CP092562.1	Staphylococcus aureus strain MRSA-WC101 plasmid unnamed, complete sequence
Staphylococcus aureus	GCF_022691385.1_ASM2269138v1	NZ_CP092563.1	Staphylococcus aureus strain MRSA-WC090 chromosome, complete genome
Staphylococcus aureus	GCF_022691385.1_ASM2269138v1	NZ_CP092564.1	Staphylococcus aureus strain MRSA-WC090 plasmid unnamed, complete sequence
Staphylococcus aureus	GCF_022691405.1_ASM2269140v1	NZ_CP092565.1	Staphylococcus aureus strain MRSA-WC061 chromosome, complete genome
Staphylococcus aureus	GCF_022691405.1_ASM2269140v1	NZ_CP092566.1	Staphylococcus aureus strain MRSA-WC061 plasmid unnamed, complete sequence
Staphylococcus aureus	GCF_022691425.1_ASM2269142v1	NZ_CP092567.1	Staphylococcus aureus strain MRSA-WC000 chromosome, complete genome
Staphylococcus aureus	GCF_022691425.1_ASM2269142v1	NZ_CP092568.1	Staphylococcus aureus strain MRSA-WC000 plasmid unnamed, complete sequence
Staphylococcus aureus	GCF_022693165.1_ASM2269316v1	NZ_CP092538.1	Staphylococcus aureus strain VMRSA-WC123 chromosome, complete genome
Staphylococcus aureus	GCF_022693165.1_ASM2269316v1	NZ_CP092539.1	Staphylococcus aureus strain VMRSA-WC123 plasmid unnamed, complete sequence
Staphylococcus aureus	GCF_022693185.1_ASM2269318v1	NZ_CP092540.1	Staphylococcus aureus strain VMRSA-WC121 chromosome, complete genome
Staphylococcus aureus	GCF_022693185.1_ASM2269318v1	NZ_CP092541.1	Staphylococcus aureus strain VMRSA-WC121 plasmid unnamed, complete sequence
Staphylococcus aureus	GCF_022693205.1_ASM2269320v1	NZ_CP092542.1	Staphylococcus aureus strain VRMSSA-WC113 chromosome, complete genome
Staphylococcus aureus	GCF_022693205.1_ASM2269320v1	NZ_CP092543.1	Staphylococcus aureus strain VRMSSA-WC113 plasmid unnamed, complete sequence
Staphylococcus aureus	GCF_022693225.1_ASM2269322v1	NZ_CP092581.1	Staphylococcus aureus strain VRMSSA-WC111 chromosome, complete genome
Staphylococcus aureus	GCF_022693225.1_ASM2269322v1	NZ_CP092582.1	Staphylococcus aureus strain VRMSSA-WC111 plasmid unnamed, complete sequence
Staphylococcus aureus	GCF_022693245.1_ASM2269324v1	NZ_CP092544.1	Staphylococcus aureus strain VMRSA-WC102 chromosome, complete genome
Staphylococcus aureus	GCF_022693245.1_ASM2269324v1	NZ_CP092545.1	Staphylococcus aureus strain VMRSA-WC102 plasmid unnamed1, complete sequence
Staphylococcus aureus	GCF_022693245.1_ASM2269324v1	NZ_CP092546.1	Staphylococcus aureus strain VMRSA-WC102 plasmid unnamed2, complete sequence
Staphylococcus aureus	GCF_022693265.1_ASM2269326v1	NZ_CP092547.1	Staphylococcus aureus strain VMRSA-WC083 chromosome, complete genome
Staphylococcus aureus	GCF_022693265.1_ASM2269326v1	NZ_CP092548.1	Staphylococcus aureus strain VMRSA-WC083 plasmid unnamed1, complete sequence
Staphylococcus aureus	GCF_022693265.1_ASM2269326v1	NZ_CP092549.1	Staphylococcus aureus strain VMRSA-WC083 plasmid unnamed2, complete sequence
Staphylococcus aureus	GCF_022693285.1_ASM2269328v1	NZ_CP092550.1	Staphylococcus aureus strain VMRSA-WC082 chromosome, complete genome
Staphylococcus aureus	GCF_022693285.1_ASM2269328v1	NZ_CP092551.1	Staphylococcus aureus strain VMRSA-WC082 plasmid unnamed, complete sequence
Staphylococcus aureus	GCF_022693305.1_ASM2269330v1	NZ_CP092552.1	Staphylococcus aureus strain VMRSA-WC081 chromosome, complete genome
Staphylococcus aureus	GCF_022693305.1_ASM2269330v1	NZ_CP092553.1	Staphylococcus aureus strain VMRSA-WC081 plasmid unnamed, complete sequence
Staphylococcus aureus	GCF_022693325.1_ASM2269332v1	NZ_CP092554.1	Staphylococcus aureus strain VMRSA-WC071 chromosome, complete genome
Staphylococcus aureus	GCF_022693325.1_ASM2269332v1	NZ_CP092555.1	Staphylococcus aureus strain VMRSA-WC071 plasmid unnamed, complete sequence
Staphylococcus aureus	GCF_022699245.1_ASM2269924v1	NZ_CP093930.1	Staphylococcus aureus strain WA121-2010_15611 chromosome, complete genome
Staphylococcus aureus	GCF_022699245.1_ASM2269924v1	NZ_CP093931.1	Staphylococcus aureus strain WA121-2010_15611 plasmid p2010-15611-1, complete sequence
Staphylococcus aureus	GCF_022699245.1_ASM2269924v1	NZ_CP093932.1	Staphylococcus aureus strain WA121-2010_15611 plasmid p2010-15611-2, complete sequence
Staphylococcus aureus	GCF_022699265.1_ASM2269926v1	NZ_CP093935.1	Staphylococcus aureus strain WA121-2021_16354 chromosome, complete genome
Staphylococcus aureus	GCF_022699265.1_ASM2269926v1	NZ_CP093936.1	Staphylococcus aureus strain WA121-2021_16354 plasmid p2021-16354-1, complete sequence
Staphylococcus aureus	GCF_022699265.1_ASM2269926v1	NZ_CP093937.1	Staphylococcus aureus strain WA121-2021_16354 plasmid p2021-16354-2, complete sequence
Staphylococcus aureus	GCF_022699285.1_ASM2269928v1	NZ_CP093933.1	Staphylococcus aureus strain WA121-2021_15363 chromosome, complete genome
Staphylococcus aureus	GCF_022699285.1_ASM2269928v1	NZ_CP093934.1	Staphylococcus aureus strain WA121-2021_15363 plasmid p2021-15363, complete sequence
Staphylococcus aureus	GCF_022809795.1_ASM2280979v1	NZ_CP094443.1	Staphylococcus aureus strain N10CSA27 chromosome, complete genome
Staphylococcus aureus	GCF_022809795.1_ASM2280979v1	NZ_CP094444.1	Staphylococcus aureus strain N10CSA27 plasmid pN10CSA27, complete sequence
Staphylococcus aureus	GCF_022832755.1_ASM2283275v1	NZ_CP094855.1	Staphylococcus aureus strain NY2491 chromosome, complete genome
Staphylococcus aureus	GCF_022832755.1_ASM2283275v1	NZ_CP094856.1	Staphylococcus aureus strain NY2491 plasmid pNY2491, complete sequence
Staphylococcus aureus	GCF_022832775.1_ASM2283277v1	NZ_CP094857.1	Staphylococcus aureus strain ATCC 29213 chromosome, complete genome
Staphylococcus aureus	GCF_022832775.1_ASM2283277v1	NZ_CP094858.1	Staphylococcus aureus strain ATCC 29213 plasmid pATCC29213, complete sequence
Staphylococcus aureus	GCF_022832835.1_ASM2283283v1	NZ_CP094853.1	Staphylococcus aureus strain NY2010 chromosome, complete genome
Staphylococcus aureus	GCF_022832835.1_ASM2283283v1	NZ_CP094854.1	Staphylococcus aureus strain NY2010 plasmid pNY2010, complete sequence
Staphylococcus aureus	GCF_022869625.1_ASM2286962v1	NZ_CP064365.1	Staphylococcus aureus strain PartF-Saureus-RM8376 chromosome, complete genome
Staphylococcus aureus	GCF_022869625.1_ASM2286962v1	NZ_CP064366.1	Staphylococcus aureus strain PartF-Saureus-RM8376 plasmid unnamed, complete sequence
Staphylococcus aureus	GCF_022870005.1_ASM2287000v1	NZ_CP064389.1	Staphylococcus aureus strain PartE-Saureus-RM8376 chromosome, complete genome
Staphylococcus aureus	GCF_022870005.1_ASM2287000v1	NZ_CP064390.1	Staphylococcus aureus strain PartE-Saureus-RM8376 plasmid unnamed, complete sequence
Staphylococcus aureus	GCF_022870465.1_ASM2287046v1	NZ_CP078521.1	Staphylococcus aureus strain ATCC 29213 chromosome, complete genome
Staphylococcus aureus	GCF_022870465.1_ASM2287046v1	NZ_CP078522.1	Staphylococcus aureus strain ATCC 29213 plasmid unnamed, complete sequence
Staphylococcus aureus	GCF_022870625.1_ASM2287062v1	NZ_CP064772.1	Staphylococcus aureus strain TCH32767 chromosome, complete genome
Staphylococcus aureus	GCF_023170025.1_ASM2317002v1	NZ_AP025683.1	Staphylococcus aureus strain JP025 chromosome
Staphylococcus aureus	GCF_023170025.1_ASM2317002v1	NZ_AP025684.1	Staphylococcus aureus strain JP025 plasmid pJP025
Staphylococcus aureus	GCF_023170045.1_ASM2317004v1	NZ_AP025693.1	Staphylococcus aureus strain JICS127 chromosome, complete genome
Staphylococcus aureus	GCF_023170045.1_ASM2317004v1	NZ_AP025694.1	Staphylococcus aureus strain JICS127 plasmid JICSp1, complete sequence
Staphylococcus aureus	GCF_023170045.1_ASM2317004v1	NZ_AP025695.1	Staphylococcus aureus strain JICS127 plasmid JICSp2, complete sequence
Staphylococcus aureus	GCF_023204895.1_ASM2320489v1	NZ_CP096248.1	Staphylococcus aureus strain RAC082018-A chromosome
Staphylococcus aureus	GCF_023204915.1_ASM2320491v1	NZ_CP096249.1	Staphylococcus aureus strain RAC075018-C chromosome
Staphylococcus aureus	GCF_023204935.1_ASM2320493v1	NZ_CP096250.1	Staphylococcus aureus strain RAC013018-A chromosome
Staphylococcus aureus	GCF_900004855.1_BB155	NZ_LN854556.1	Staphylococcus aureus strain BB155 chromosome 1, complete sequence
Staphylococcus aureus	GCF_900017775.1_NZAK3	NZ_LT009690.1	Staphylococcus aureus strain NZAK3 chromosome 1
Staphylococcus aureus	GCF_900017775.1_NZAK3	NZ_LT009691.1	Staphylococcus aureus strain NZAK3 plasmid 2
Staphylococcus aureus	GCF_900092595.1_Sa_Newman_UoM	NZ_LT598688.1	Staphylococcus aureus isolate Sa_Newman_UoM chromosome 1
Staphylococcus aureus	GCF_900096745.1_AUS0325	NZ_LT615218.1	Staphylococcus aureus strain AUS0325 chromosome 1
Staphylococcus aureus	GCF_900129335.1_PP_HGAG_QV30_2SC_T4	NZ_LT671859.1	Staphylococcus aureus isolate Clinical isolate chromosome I
Staphylococcus aureus	GCF_900129335.1_PP_HGAG_QV30_2SC_T4	NZ_LT671860.1	Staphylococcus aureus isolate Clinical isolate plasmid II
Staphylococcus aureus	GCF_900240125.1_171	NZ_LT963437.1	Staphylococcus aureus isolate Staphylococcus aureus 171 chromosome I
Staphylococcus aureus	GCF_900323905.1_24117-WT	NZ_LT996891.1	Staphylococcus aureus isolate 24117-WT chromosome I
Staphylococcus aureus	GCF_900323925.1_1549-WT	NZ_LT992434.1	Staphylococcus aureus isolate 1549-WT chromosome I
Staphylococcus aureus	GCF_900323955.1_1549-REV	NZ_LT992436.1	Staphylococcus aureus isolate 1549-REV chromosome I
Staphylococcus aureus	GCF_900323965.1_1549-SCV	NZ_LT992435.1	Staphylococcus aureus isolate 1549-SCV chromosome I
Staphylococcus aureus	GCF_900324045.1_24117-REV	NZ_LT996889.1	Staphylococcus aureus isolate 24117-REV chromosome I
Staphylococcus aureus	GCF_900324065.1_24117-SCV	NZ_LT996890.1	Staphylococcus aureus isolate 24117-SCV chromosome I
Staphylococcus aureus	GCF_900324205.1_1_1439	NZ_LT992456.1	Staphylococcus aureus isolate 1_1439 chromosome I
Staphylococcus aureus	GCF_900324205.1_1_1439	NZ_LT992457.1	Staphylococcus aureus isolate 1_1439 plasmid II
Staphylococcus aureus	GCF_900324215.1_3_LA_115	NZ_LT992464.1	Staphylococcus aureus isolate 3_LA_115 chromosome I
Staphylococcus aureus	GCF_900324225.1_7_4623	NZ_LT992458.1	Staphylococcus aureus isolate 7_4623 chromosome I
Staphylococcus aureus	GCF_900324235.1_5_3949	NZ_LT992462.1	Staphylococcus aureus isolate 5_3949 chromosome I
Staphylococcus aureus	GCF_900324245.1_8_LA_272	NZ_LT992461.1	Staphylococcus aureus isolate 8_LA_272 chromosome I
Staphylococcus aureus	GCF_900324255.1_2_LA_86	NZ_LT992463.1	Staphylococcus aureus isolate 2_LA_86 chromosome I
Staphylococcus aureus	GCF_900324265.1_9_LA_281	NZ_LT992460.1	Staphylococcus aureus isolate 9_LA_281 chromosome I
Staphylococcus aureus	GCF_900324275.1_6_LA_232	NZ_LT992465.1	Staphylococcus aureus isolate 6_LA_232 chromosome I
Staphylococcus aureus	GCF_900324285.1_4_LA_208	NZ_LT992466.1	Staphylococcus aureus isolate 4_LA_208 chromosome I
Staphylococcus aureus	GCF_900324295.1_16_LA_309	NZ_LT992467.1	Staphylococcus aureus isolate 16_LA_309 chromosome I
Staphylococcus aureus	GCF_900324305.1_13_LA_301	NZ_LT992470.1	Staphylococcus aureus isolate 13_LA_301 chromosome I
Staphylococcus aureus	GCF_900324315.1_12_LA_293	NZ_LT992468.1	Staphylococcus aureus isolate 12_LA_293 chromosome I
Staphylococcus aureus	GCF_900324325.1_14_5418	NZ_LT992473.1	Staphylococcus aureus isolate 14_5418 chromosome I
Staphylococcus aureus	GCF_900324335.1_15_LA_305	NZ_LT992469.1	Staphylococcus aureus isolate 15_LA_305 chromosome I
Staphylococcus aureus	GCF_900324345.1_17_LA_343	NZ_LT992471.1	Staphylococcus aureus isolate 17_LA_343 chromosome I
Staphylococcus aureus	GCF_900324355.1_10_5235	NZ_LT992472.1	Staphylococcus aureus isolate 10_5235 chromosome I
Staphylococcus aureus	GCF_900324365.1_19_LA_388	NZ_LT992474.1	Staphylococcus aureus isolate 19_LA_388 chromosome I
Staphylococcus aureus	GCF_900324385.1_20_LA_415	NZ_LT992475.1	Staphylococcus aureus isolate 20_LA_415 chromosome I
Staphylococcus aureus	GCF_900324405.1_21_LA_436	NZ_LT992476.1	Staphylococcus aureus isolate 21_LA_436 chromosome I
Staphylococcus aureus	GCF_900324415.1_22_LA_562	NZ_LT992477.1	Staphylococcus aureus isolate 22_LA_562 chromosome I
Staphylococcus aureus	GCF_900474525.1_40677_F01	NZ_LS483301.1	Staphylococcus aureus strain NCTC13394 chromosome 1, complete sequence
Staphylococcus aureus	GCF_900474535.1_40853_C01	NZ_LS483300.1	Staphylococcus aureus strain NCTC7485 chromosome 1, complete sequence
Staphylococcus aureus	GCF_900474555.1_40657_E01	NZ_LS483308.1	Staphylococcus aureus strain NCTC13137 chromosome 1, complete sequence
Staphylococcus aureus	GCF_900474565.1_41315_B01	NZ_LS483302.1	Staphylococcus aureus strain NCTC8726 chromosome 1, complete sequence
Staphylococcus aureus	GCF_900474575.1_40415_F02	NZ_LS483309.1	Staphylococcus aureus strain NCTC9944 chromosome 1, complete sequence
Staphylococcus aureus	GCF_900474665.1_41236_D02	NZ_LS483310.1	Staphylococcus aureus strain NCTC9752 chromosome 1, complete sequence
Staphylococcus aureus	GCF_900474675.1_40961_F01	NZ_LS483314.1	Staphylococcus aureus strain NCTC3761 chromosome 1, complete sequence
Staphylococcus aureus	GCF_900474695.1_41004_B01	NZ_LS483317.1	Staphylococcus aureus strain NCTC5663 chromosome 1, complete sequence
Staphylococcus aureus	GCF_900474715.1_41004_D01	NZ_LS483311.1	Staphylococcus aureus strain NCTC6136 chromosome 1, complete sequence
Staphylococcus aureus	GCF_900474725.1_40677_A01	NZ_LS483319.1	Staphylococcus aureus strain NCTC13140 chromosome 1, complete sequence
Staphylococcus aureus	GCF_900474735.1_40871_F01	NZ_LS483316.1	Staphylococcus aureus strain NCTC13395 chromosome 1, complete sequence
Staphylococcus aureus	GCF_900474755.1_41236_E02	NZ_LS483324.1	Staphylococcus aureus strain NCTC10344 chromosome 1, complete sequence
Staphylococcus aureus	GCF_900475055.1_42197_E02	NZ_LS483350.1	Staphylococcus aureus strain NCTC11940 chromosome 1, complete sequence
Staphylococcus aureus	GCF_900475245.1_43024_E01	NZ_LS483365.1	Staphylococcus aureus subsp. aureus NCTC 8325 chromosome 1, complete sequence
Staphylococcus aureus	GCF_900478245.1_35910_A02	NZ_LS483484.1	Staphylococcus aureus strain NCTC13277 chromosome 1, complete sequence
Staphylococcus aureus	GCF_900607245.1_JKD6009	NZ_LR027876.1	Staphylococcus aureus strain JKD6009 isolate JKD6009 chromosome 1
Staphylococcus aureus	GCF_900607255.1_BPH2019	NZ_LR027870.1	Staphylococcus aureus strain BPH2019 isolate BPH2019 chromosome 1
Staphylococcus aureus	GCF_900607255.1_BPH2019	NZ_LR027871.1	Staphylococcus aureus strain BPH2019 isolate BPH2019 plasmid 2
Staphylococcus aureus	GCF_900607255.1_BPH2019	NZ_LR027872.1	Staphylococcus aureus strain BPH2019 isolate BPH2019 plasmid 3
Staphylococcus aureus	GCF_900607265.1_BPH2003	NZ_LR027878.1	Staphylococcus aureus strain BPH2003 isolate BPH2003 chromosome 1
Staphylococcus aureus	GCF_900607265.1_BPH2003	NZ_LR027879.1	Staphylococcus aureus strain BPH2003 isolate BPH2003 plasmid 2
Staphylococcus aureus	GCF_900607275.1_BPH2070	NZ_LR027873.1	Staphylococcus aureus strain BPH2070 isolate BPH2070 chromosome 1
Staphylococcus aureus	GCF_900607285.1_BPH3244	NZ_LR027877.1	Staphylococcus aureus isolate BPH3244 chromosome 1
Staphylococcus aureus	GCF_900607295.1_BPH2869	NZ_LR027869.1	Staphylococcus aureus isolate BPH2869 chromosome 1
Staphylococcus aureus	GCF_900607305.1_BPH2056	NZ_LR027874.1	Staphylococcus aureus strain BPH2056 isolate BPH2056 chromosome 1
Staphylococcus aureus	GCF_900607305.1_BPH2056	NZ_LR027875.1	Staphylococcus aureus strain BPH2056 isolate BPH2056 plasmid 2
Staphylococcus aureus	GCF_900620215.1_BPH2760	NZ_LR130509.1	Staphylococcus aureus strain BPH2760 isolate BPH2760 chromosome 1
Staphylococcus aureus	GCF_900620215.1_BPH2760	NZ_LR130510.1	Staphylococcus aureus strain BPH2760 isolate BPH2760 plasmid 2
Staphylococcus aureus	GCF_900620225.1_BPH2819	NZ_LR130511.1	Staphylococcus aureus strain BPH2819 isolate BPH2819 chromosome 1
Staphylococcus aureus	GCF_900620225.1_BPH2819	NZ_LR130512.1	Staphylococcus aureus strain BPH2819 isolate BPH2819 plasmid 2
Staphylococcus aureus	GCF_900620235.1_BPH2900	NZ_LR130513.1	Staphylococcus aureus strain BPH2900 isolate BPH2900 chromosome 1
Staphylococcus aureus	GCF_900620235.1_BPH2900	NZ_LR130514.1	Staphylococcus aureus strain BPH2900 isolate BPH2900 plasmid 2
Staphylococcus aureus	GCF_900620245.1_BPH2947	NZ_LR130515.1	Staphylococcus aureus strain BPH2947 isolate BPH2947 chromosome 1
Staphylococcus aureus	GCF_900620245.1_BPH2947	NZ_LR130516.1	Staphylococcus aureus strain BPH2947 isolate BPH2947 plasmid 2
Staphylococcus aureus	GCF_900620245.1_BPH2947	NZ_LR130517.1	Staphylococcus aureus strain BPH2947 isolate BPH2947 plasmid 3
Staphylococcus aureus	GCF_900620255.1_BPH2986	NZ_LR130518.1	Staphylococcus aureus strain BPH2986 isolate BPH2986 chromosome 1
Staphylococcus aureus	GCF_900620255.1_BPH2986	NZ_LR130519.1	Staphylococcus aureus strain BPH2986 isolate BPH2986 plasmid 2
Staphylococcus aureus	GCF_900620255.1_BPH2986	NZ_LR130520.1	Staphylococcus aureus strain BPH2986 isolate BPH2986 plasmid 3
Staphylococcus aureus	GCF_900635095.1_33763_A01	NZ_LR133917.1	Staphylococcus aureus strain NCTC8317 chromosome 1, complete sequence
Staphylococcus aureus	GCF_900635245.1_40415_C02	NZ_LR134086.1	Staphylococcus aureus strain NCTC13142 chromosome 1, complete sequence
Staphylococcus aureus	GCF_900635265.1_40574_H02	NZ_LR134085.1	Staphylococcus aureus strain NCTC12233 chromosome 1, complete sequence
Staphylococcus aureus	GCF_900635285.1_40677_B02	NZ_LR134087.1	Staphylococcus aureus strain NCTC7121 chromosome 1, complete sequence
Staphylococcus aureus	GCF_900635305.1_40961_G01	NZ_LR134091.1	Staphylococcus aureus strain NCTC4137 chromosome 1, complete sequence
Staphylococcus aureus	GCF_900635315.1_41255_H01	NZ_LR134090.1	Staphylococcus aureus strain NCTC9555 chromosome 1, complete sequence
Staphylococcus aureus	GCF_900635335.1_41556_G01	NZ_LR134093.1	Staphylococcus aureus strain NCTC11965 chromosome 1, complete sequence
Staphylococcus aureus	GCF_900635505.1_3012STDY6191362	NZ_LR134139.1	Staphylococcus aureus strain NCTC4163 chromosome 1, complete sequence
Staphylococcus aureus	GCF_900635905.1_35910_F01	NZ_LR134193.1	Staphylococcus aureus strain NCTC13616 chromosome 1, complete sequence
Staphylococcus aureus	GCF_900636335.1_40798_F01	NZ_LR134271.1	Staphylococcus aureus strain NCTC7988 chromosome 1, complete sequence
Staphylococcus aureus	GCF_900636695.1_43874_B01	NZ_LR134305.1	Staphylococcus aureus strain NCTC1803 chromosome 1, complete sequence
Staphylococcus aureus	GCF_900637155.1_49386_H02	NZ_LR134351.1	Staphylococcus aureus strain NCTC13811 chromosome 1, complete sequence
Staphylococcus aureus	GCF_903932595.1_P3.1	NZ_LR822060.1	Staphylococcus aureus isolate P3.1 chromosome 1, complete sequence
Staphylococcus aureus	GCF_903932605.1_HU-14	NZ_LR822061.1	Staphylococcus aureus isolate HU-14 chromosome 1, complete sequence
Bacillus anthracis	GCF_000007845.1_ASM784v1	NC_003997.3	Bacillus anthracis str. Ames, complete sequence
Bacillus anthracis	GCF_000008165.1_ASM816v1	NC_005945.1	Bacillus anthracis str. Sterne, complete sequence
Bacillus anthracis	GCF_000008445.1_ASM844v1	NC_007530.2	Bacillus anthracis str. 'Ames Ancestor', complete sequence
Bacillus anthracis	GCF_000008445.1_ASM844v1	NC_007322.2	Bacillus anthracis str. 'Ames Ancestor' plasmid pXO1, complete sequence
Bacillus anthracis	GCF_000008445.1_ASM844v1	NC_007323.3	Bacillus anthracis str. 'Ames Ancestor' plasmid pXO2, complete sequence
Bacillus anthracis	GCF_000021445.1_ASM2144v1	NC_012581.1	Bacillus anthracis str. CDC 684, complete sequence
Bacillus anthracis	GCF_000021445.1_ASM2144v1	NC_012579.1	Bacillus anthracis str. CDC 684 plasmid pX01, complete sequence
Bacillus anthracis	GCF_000021445.1_ASM2144v1	NC_012577.1	Bacillus anthracis str. CDC 684 plasmid pX02, complete sequence
Bacillus anthracis	GCF_000022865.1_ASM2286v1	NC_012659.1	Bacillus anthracis str. A0248, complete sequence
Bacillus anthracis	GCF_000022865.1_ASM2286v1	NC_012656.1	Bacillus anthracis str. A0248 plasmid pXO1, complete sequence
Bacillus anthracis	GCF_000022865.1_ASM2286v1	NC_012655.1	Bacillus anthracis str. A0248 plasmid pXO2, complete sequence
Bacillus anthracis	GCF_000258885.1_ASM25888v1	NC_017729.1	Bacillus anthracis str. H9401, complete sequence
Bacillus anthracis	GCF_000258885.1_ASM25888v1	NC_017726.1	Bacillus anthracis str. H9401 plasmid BAP1, complete sequence
Bacillus anthracis	GCF_000258885.1_ASM25888v1	NC_017727.1	Bacillus anthracis str. H9401 plasmid BAP2, complete sequence
Bacillus anthracis	GCF_000295695.2_ASM29569v2	NZ_CP047131.1	Bacillus anthracis str. BF1 chromosome, complete genome
Bacillus anthracis	GCF_000295695.2_ASM29569v2	NZ_CP047132.1	Bacillus anthracis str. BF1 plasmid pXO1, complete sequence
Bacillus anthracis	GCF_000295695.2_ASM29569v2	NZ_CP047133.1	Bacillus anthracis str. BF1 plasmid pXO2, complete sequence
Bacillus anthracis	GCF_000512775.2_ASM51277v2	NZ_CP001974.2	Bacillus anthracis str. A16R chromosome, complete genome
Bacillus anthracis	GCF_000512775.2_ASM51277v2	NZ_CP001975.2	Bacillus anthracis str. A16R plasmid pXO1, complete sequence
Bacillus anthracis	GCF_000512835.2_ASM51283v2	NZ_CP001970.2	Bacillus anthracis str. A16 chromosome, complete genome
Bacillus anthracis	GCF_000512835.2_ASM51283v2	NZ_CP001971.2	Bacillus anthracis str. A16 plasmid pXO1, complete sequence
Bacillus anthracis	GCF_000512835.2_ASM51283v2	NZ_CP001972.2	Bacillus anthracis str. A16 plasmid pXO2, complete sequence
Bacillus anthracis	GCF_000534935.2_ASM53493v2	NZ_AP018443.1	Bacillus anthracis strain CZC5 chromosome, complete genome
Bacillus anthracis	GCF_000534935.2_ASM53493v2	NZ_AP018444.1	Bacillus anthracis strain CZC5 plasmid pXO1, complete sequence
Bacillus anthracis	GCF_000534935.2_ASM53493v2	NZ_AP018445.1	Bacillus anthracis strain CZC5 plasmid pXO2, complete sequence
Bacillus anthracis	GCF_000558965.1_Ba8903G_1.0	NZ_CM002401.1	Bacillus anthracis 8903-G chromosome, whole genome shotgun sequence
Bacillus anthracis	GCF_000558965.1_Ba8903G_1.0	NZ_CM002402.1	Bacillus anthracis 8903-G plasmid pXO1, whole genome shotgun sequence
Bacillus anthracis	GCF_000558965.1_Ba8903G_1.0	NZ_CM002403.1	Bacillus anthracis 8903-G plasmid pXO2, whole genome shotgun sequence
Bacillus anthracis	GCF_000558985.1_Ba9080G_1.0	NZ_CM002398.1	Bacillus anthracis 9080-G chromosome, whole genome shotgun sequence
Bacillus anthracis	GCF_000558985.1_Ba9080G_1.0	NZ_CM002399.1	Bacillus anthracis 9080-G plasmid pXO1, whole genome shotgun sequence
Bacillus anthracis	GCF_000558985.1_Ba9080G_1.0	NZ_CM002400.1	Bacillus anthracis 9080-G plasmid pXO2, whole genome shotgun sequence
Bacillus anthracis	GCF_000559005.1_Ba52G_1.0	NZ_CM002395.1	Bacillus anthracis 52-G chromosome, whole genome shotgun sequence
Bacillus anthracis	GCF_000559005.1_Ba52G_1.0	NZ_CM002396.1	Bacillus anthracis 52-G plasmid pXO1, whole genome shotgun sequence
Bacillus anthracis	GCF_000559005.1_Ba52G_1.0	NZ_CM002397.1	Bacillus anthracis 52-G plasmid pXO2, whole genome shotgun sequence
Bacillus anthracis	GCF_000583105.1_ASM58310v1	NZ_CP006742.1	Bacillus anthracis str. SVA11 chromosome, complete genome
Bacillus anthracis	GCF_000583105.1_ASM58310v1	NZ_CP006743.1	Bacillus anthracis str. SVA11 plasmid pXO1, complete sequence
Bacillus anthracis	GCF_000583105.1_ASM58310v1	NZ_CP006744.1	Bacillus anthracis str. SVA11 plasmid pXO2, complete sequence
Bacillus anthracis	GCF_000725325.1_ASM72532v1	NZ_CP008846.1	Bacillus anthracis strain HYU01 chromosome, complete genome
Bacillus anthracis	GCF_000725325.1_ASM72532v1	NZ_CP008847.1	Bacillus anthracis strain HYU01 plasmid pX01, complete sequence
Bacillus anthracis	GCF_000725325.1_ASM72532v1	NZ_CP008848.1	Bacillus anthracis strain HYU01 plasmid pX02, complete sequence
Bacillus anthracis	GCF_000742315.1_ASM74231v1	NZ_CM002879.1	Bacillus anthracis strain Smith 1013 chromosome, whole genome shotgun sequence
Bacillus anthracis	GCF_000742315.1_ASM74231v1	NZ_CM002880.1	Bacillus anthracis strain Smith 1013 plasmid pXO2, whole genome shotgun sequence
Bacillus anthracis	GCF_000742655.1_ASM74265v1	NZ_CP007618.1	Bacillus anthracis strain 2000031021 chromosome, complete genome
Bacillus anthracis	GCF_000742655.1_ASM74265v1	NZ_CP007617.1	Bacillus anthracis strain 2000031021 plasmid pXO2, complete sequence
Bacillus anthracis	GCF_000742695.1_ASM74269v1	NZ_CP008752.1	Bacillus anthracis strain delta Sterne chromosome
Bacillus anthracis	GCF_000742875.1_ASM74287v1	NZ_CP007704.1	Bacillus anthracis strain BFV chromosome
Bacillus anthracis	GCF_000742875.1_ASM74287v1	NZ_CP007702.1	Bacillus anthracis strain BFV plasmid unnamed_1, complete sequence
Bacillus anthracis	GCF_000742875.1_ASM74287v1	NZ_CP007703.1	Bacillus anthracis strain BFV plasmid unnamed_2
Bacillus anthracis	GCF_000742895.1_ASM74289v1	NZ_CP007666.1	Bacillus anthracis str. Vollum chromosome, complete genome
Bacillus anthracis	GCF_000742895.1_ASM74289v1	NZ_CP007664.1	Bacillus anthracis str. Vollum plasmid unnamed_1, complete sequence
Bacillus anthracis	GCF_000742895.1_ASM74289v1	NZ_CP007665.1	Bacillus anthracis str. Vollum plasmid unnamed_2, complete sequence
Bacillus anthracis	GCF_000831505.1_ASM83150v1	NZ_CP010813.1	Bacillus anthracis strain Pollino chromosome
Bacillus anthracis	GCF_000831505.1_ASM83150v1	NZ_CP010814.1	Bacillus anthracis strain Pollino plasmid pXO1
Bacillus anthracis	GCF_000831505.1_ASM83150v1	NZ_CP010815.1	Bacillus anthracis strain Pollino plasmid pXO2, complete sequence
Bacillus anthracis	GCF_000832425.1_ASM83242v1	NZ_CP009325.1	Bacillus anthracis strain PAK-1 chromosome, complete genome
Bacillus anthracis	GCF_000832425.1_ASM83242v1	NZ_CP009324.1	Bacillus anthracis strain PAK-1 plasmid 1, complete sequence
Bacillus anthracis	GCF_000832445.1_ASM83244v1	NZ_CP009328.1	Bacillus anthracis strain Vollum 1B chromosome, complete genome
Bacillus anthracis	GCF_000832445.1_ASM83244v1	NZ_CP009327.1	Bacillus anthracis strain Vollum 1B plasmid 1, complete sequence
Bacillus anthracis	GCF_000832445.1_ASM83244v1	NZ_CP009326.1	Bacillus anthracis strain Vollum 1B plasmid 2, complete sequence
Bacillus anthracis	GCF_000832465.1_ASM83246v1	NZ_CP009331.1	Bacillus anthracis strain K3 chromosome, complete genome
Bacillus anthracis	GCF_000832465.1_ASM83246v1	NZ_CP009330.1	Bacillus anthracis strain K3 plasmid 1, complete sequence
Bacillus anthracis	GCF_000832465.1_ASM83246v1	NZ_CP009329.1	Bacillus anthracis strain K3 plasmid 2, complete sequence
Bacillus anthracis	GCF_000832505.1_ASM83250v1	NZ_CP009341.1	Bacillus anthracis strain Ohio ACB chromosome, complete genome
Bacillus anthracis	GCF_000832505.1_ASM83250v1	NZ_CP009340.1	Bacillus anthracis strain Ohio ACB plasmid 1, complete sequence
Bacillus anthracis	GCF_000832505.1_ASM83250v1	NZ_CP009339.1	Bacillus anthracis strain Ohio ACB plasmid 2, complete sequence
Bacillus anthracis	GCF_000832565.1_ASM83256v1	NZ_CP009464.1	Bacillus anthracis strain SK-102 chromosome, complete genome
Bacillus anthracis	GCF_000832565.1_ASM83256v1	NZ_CP009463.1	Bacillus anthracis strain SK-102 plasmid pXO1, complete sequence
Bacillus anthracis	GCF_000832565.1_ASM83256v1	NZ_CP009462.1	Bacillus anthracis strain SK-102 plasmid pXO2, complete sequence
Bacillus anthracis	GCF_000832585.1_ASM83258v1	NZ_CP009476.1	Bacillus anthracis strain Pasteur chromosome, complete genome
Bacillus anthracis	GCF_000832585.1_ASM83258v1	NZ_CP009475.1	Bacillus anthracis strain Pasteur plasmid pXO2, complete sequence
Bacillus anthracis	GCF_000832635.1_ASM83263v1	NZ_CP009541.1	Bacillus anthracis str. Sterne chromosome, complete genome
Bacillus anthracis	GCF_000832635.1_ASM83263v1	NZ_CP009540.1	Bacillus anthracis str. Sterne plasmid pXO1, complete sequence
Bacillus anthracis	GCF_000832665.1_ASM83266v1	NZ_CP009544.1	Bacillus anthracis strain BA1015 chromosome, complete genome
Bacillus anthracis	GCF_000832665.1_ASM83266v1	NZ_CP009543.1	Bacillus anthracis strain BA1015 plasmid pXO1, complete sequence
Bacillus anthracis	GCF_000832665.1_ASM83266v1	NZ_CP009542.1	Bacillus anthracis strain BA1015 plasmid pXO2, complete sequence
Bacillus anthracis	GCF_000832725.1_ASM83272v1	NZ_CP009700.1	Bacillus anthracis strain BA1035 chromosome, complete genome
Bacillus anthracis	GCF_000832725.1_ASM83272v1	NZ_CP009699.1	Bacillus anthracis strain BA1035 plasmid pXO1, complete sequence
Bacillus anthracis	GCF_000832725.1_ASM83272v1	NZ_CP009698.1	Bacillus anthracis strain BA1035 plasmid pXO2, complete sequence
Bacillus anthracis	GCF_000832745.1_ASM83274v1	NZ_CP009697.1	Bacillus anthracis strain RA3 chromosome, complete genome
Bacillus anthracis	GCF_000832745.1_ASM83274v1	NZ_CP009696.1	Bacillus anthracis strain RA3 plasmid pXO1, complete sequence
Bacillus anthracis	GCF_000832745.1_ASM83274v1	NZ_CP009695.1	Bacillus anthracis strain RA3 plasmid pXO2, complete sequence
Bacillus anthracis	GCF_000832785.1_ASM83278v1	NZ_CP009598.1	Bacillus anthracis str. V770-NP-1R chromosome, complete genome
Bacillus anthracis	GCF_000832785.1_ASM83278v1	NZ_CP009597.1	Bacillus anthracis str. V770-NP-1R plasmid pXO1, complete sequence
Bacillus anthracis	GCF_000832965.1_ASM83296v1	NZ_CP009902.1	Bacillus anthracis strain 2002013094 chromosome, complete genome
Bacillus anthracis	GCF_000832965.1_ASM83296v1	NZ_CP009901.1	Bacillus anthracis strain 2002013094 plasmid pXO1, complete sequence
Bacillus anthracis	GCF_000832965.1_ASM83296v1	NZ_CP009900.1	Bacillus anthracis strain 2002013094 plasmid pXO2, complete sequence
Bacillus anthracis	GCF_000833065.1_ASM83306v1	NZ_CP009981.1	Bacillus anthracis strain Ames isolate BACI008 chromosome, complete genome
Bacillus anthracis	GCF_000833065.1_ASM83306v1	NZ_CP009980.1	Bacillus anthracis strain Ames isolate BACI008 plasmid unnamed1, complete sequence
Bacillus anthracis	GCF_000833065.1_ASM83306v1	NZ_CP009979.1	Bacillus anthracis strain Ames isolate BACI008 plasmid unnamed2, complete sequence
Bacillus anthracis	GCF_000833125.1_ASM83312v1	NZ_CP010322.1	Bacillus anthracis strain Canadian Bison isolate A0369 chromosome, complete genome
Bacillus anthracis	GCF_000833125.1_ASM83312v1	NZ_CP010321.1	Bacillus anthracis strain Canadian Bison isolate A0369 plasmid 1, complete sequence
Bacillus anthracis	GCF_000833125.1_ASM83312v1	NZ_CP010320.1	Bacillus anthracis strain Canadian Bison isolate A0369 plasmid 2, complete sequence
Bacillus anthracis	GCF_000833275.1_ASM83327v1	NZ_CP009315.1	Bacillus anthracis str. Turkey32 strain 35 chromosome, complete genome
Bacillus anthracis	GCF_000833275.1_ASM83327v1	NZ_CP009314.1	Bacillus anthracis str. Turkey32 strain 35 plasmid unnamed, complete sequence
Bacillus anthracis	GCF_000833275.1_ASM83327v1	NZ_CP009316.1	Bacillus anthracis str. Turkey32 strain 35 plasmid unnamed, complete sequence
Bacillus anthracis	GCF_000875715.1_ASM87571v1	NZ_CP010852.1	Bacillus anthracis strain A1144 chromosome, complete genome
Bacillus anthracis	GCF_000875715.1_ASM87571v1	NZ_CP010853.1	Bacillus anthracis strain A1144 plasmid pXO1, complete sequence
Bacillus anthracis	GCF_000875715.1_ASM87571v1	NZ_CP010854.1	Bacillus anthracis strain A1144 plasmid pXO2, complete sequence
Bacillus anthracis	GCF_001277955.1_ASM127795v1	NZ_CP012519.1	Bacillus anthracis strain Larissa chromosome, complete genome
Bacillus anthracis	GCF_001277955.1_ASM127795v1	NZ_CP012520.1	Bacillus anthracis strain Larissa plasmid pXO1, complete sequence
Bacillus anthracis	GCF_001277955.1_ASM127795v1	NZ_CP012521.1	Bacillus anthracis strain Larissa plasmid pXO2, complete sequence
Bacillus anthracis	GCF_001543225.1_ASM154322v1	NZ_CP014179.1	Bacillus anthracis strain Stendal chromosome, complete genome
Bacillus anthracis	GCF_001543225.1_ASM154322v1	NZ_CP014177.1	Bacillus anthracis strain Stendal plasmid pXO1, complete sequence
Bacillus anthracis	GCF_001543225.1_ASM154322v1	NZ_CP014178.1	Bacillus anthracis strain Stendal plasmid pXO2, complete sequence
Bacillus anthracis	GCF_001654475.1_ASM165447v1	NZ_CP015779.1	Bacillus anthracis strain Tangail-1 chromosome, complete genome
Bacillus anthracis	GCF_001654475.1_ASM165447v1	NZ_CP015777.1	Bacillus anthracis strain Tangail-1 plasmid pXO1, complete sequence
Bacillus anthracis	GCF_001654475.1_ASM165447v1	NZ_CP015778.1	Bacillus anthracis strain Tangail-1 plasmid pXO2, complete sequence
Bacillus anthracis	GCF_001683065.1_ASM168306v1	NZ_CP012729.1	Bacillus anthracis strain Parent2 chromosome, complete genome
Bacillus anthracis	GCF_001683095.1_ASM168309v1	NZ_CP012730.1	Bacillus anthracis strain Parent1 chromosome, complete genome
Bacillus anthracis	GCF_001683135.1_ASM168313v1	NZ_CP012720.1	Bacillus anthracis strain PR01 chromosome, complete genome
Bacillus anthracis	GCF_001683155.1_ASM168315v1	NZ_CP012721.1	Bacillus anthracis strain PR02 chromosome, complete genome
Bacillus anthracis	GCF_001683175.1_ASM168317v1	NZ_CP012722.1	Bacillus anthracis strain PR05 chromosome, complete genome
Bacillus anthracis	GCF_001683195.1_ASM168319v1	NZ_CP012723.1	Bacillus anthracis strain PR06 chromosome, complete genome
Bacillus anthracis	GCF_001683215.1_ASM168321v1	NZ_CP012724.1	Bacillus anthracis strain PR07 chromosome, complete genome
Bacillus anthracis	GCF_001683235.1_ASM168323v1	NZ_CP012725.1	Bacillus anthracis strain PR08 chromosome, complete genome
Bacillus anthracis	GCF_001683255.1_ASM168325v1	NZ_CP012726.1	Bacillus anthracis strain PR09-1 chromosome, complete genome
Bacillus anthracis	GCF_001683275.1_ASM168327v1	NZ_CP012727.1	Bacillus anthracis strain PR09-4 chromosome, complete genome
Bacillus anthracis	GCF_001683295.1_ASM168329v1	NZ_CP012728.1	Bacillus anthracis strain PR10-4 chromosome, complete genome
Bacillus anthracis	GCF_001936375.1_ASM193637v1	NZ_CP018903.1	Bacillus anthracis strain Tyrol 4675 chromosome, complete genome
Bacillus anthracis	GCF_001936375.1_ASM193637v1	NZ_CP018904.1	Bacillus anthracis strain Tyrol 4675 plasmid pXO1, complete sequence
Bacillus anthracis	GCF_001936375.1_ASM193637v1	NZ_CP018905.1	Bacillus anthracis strain Tyrol 4675 plasmid pXO2, complete sequence
Bacillus anthracis	GCF_001990245.1_ASM199024v1	NZ_CP019588.1	Bacillus anthracis strain SPV842_15 chromosome, complete genome
Bacillus anthracis	GCF_001990245.1_ASM199024v1	NZ_CP019589.1	Bacillus anthracis strain SPV842_15 plasmid pX01, complete sequence
Bacillus anthracis	GCF_002208785.1_ASM220878v2	NZ_CP022044.1	Bacillus anthracis strain FDAARGOS_341 chromosome, complete genome
Bacillus anthracis	GCF_002208785.1_ASM220878v2	NZ_CP022045.1	Bacillus anthracis strain FDAARGOS_341 plasmid unnamed1, complete sequence
Bacillus anthracis	GCF_002277915.1_ASM227791v1	NZ_CP023001.1	Bacillus anthracis strain 14RA5914 chromosome, complete genome
Bacillus anthracis	GCF_002277915.1_ASM227791v1	NZ_CP023002.1	Bacillus anthracis strain 14RA5914 plasmid pX01, complete sequence
Bacillus anthracis	GCF_002277915.1_ASM227791v1	NZ_CP023003.1	Bacillus anthracis strain 14RA5914 plasmid pX02, complete sequence
Bacillus anthracis	GCF_002356575.1_ASM235657v1	NZ_AP014833.1	Bacillus anthracis strain Shikan-NIID chromosome
Bacillus anthracis	GCF_002356575.1_ASM235657v1	NZ_AP014834.1	Bacillus anthracis strain Shikan-NIID plasmid pXO1
Bacillus anthracis	GCF_002356575.1_ASM235657v1	NZ_AP014835.1	Bacillus anthracis strain Shikan-NIID plasmid pXO2
Bacillus anthracis	GCF_002980615.3_ASM298061v3	NZ_CP066168.1	Bacillus anthracis strain STI1 chromosome, complete genome
Bacillus anthracis	GCF_003227955.1_ASM322795v1	NZ_CP029805.1	Bacillus anthracis strain London_499 chromosome, complete genome
Bacillus anthracis	GCF_003227955.1_ASM322795v1	NZ_CP029806.1	Bacillus anthracis strain London_499 plasmid pX01, complete sequence
[truncated: 158 more rows]
